# Supplementary material for: The Intrinsic Barrier Width and Its Role in Chemical Reactivity
Source: PubMed Central journal article supplement (PMC10683502; doi:10.1021/acscentsci.3c00926), 2023-11-06
Supplement: oc3c00926_si_001.pdf [file oc3c00926_si_001.pdf]

# The Intrinsic Barrier Width and its Role in Chemical Reactivity

Guanqi Qiu\* and Peter R. Schreiner\*

*Institute of Organic Chemistry, Justus Liebig University, Heinrich-Buff-Ring 17, 35392 Giessen, Germany*

\*Authors to whom correspondence should be addressed; Email: Guanqi.Qiu@org.chemie.uni-giessen.de, prs@uni-giessen.de

## Supporting Information

### Table of Contents

|                                                                        |      |
|------------------------------------------------------------------------|------|
| 1. Cartesian Coordinates of Computationally Optimized Geometries ..... | S2   |
| 2. Tunneling Computations.....                                         | S68  |
| 3. Computed Linear Free Energy Relationships .....                     | S80  |
| 4. Computed and Matrix IR Spectra.....                                 | S84  |
| 5. Matrix Kinetic Measurements .....                                   | S99  |
| References .....                                                       | S106 |

## 1. Cartesian Coordinates of Computationally Optimized Geometries

Atomic cartesian coordinates [Å] of benzoic acid derivatives were optimized at the MP2/cc-pVDZ level of theory as implemented in Gaussian 16.<sup>1</sup> This choice was made based on the comparison of energy single points for *Z*-benzoic acid derived from various levels of theory with those obtained at CCSD(T)/cc-pVTZ from our previous study.<sup>2</sup> MP2/cc-pVDZ energies are the closest to CCSD(T)/cc-pVTZ and are better than B3LYP/cc-pVDZ and M06-2X/cc-pVDZ.

Optimized structures, electronic energies, and zero-point vibrational energies (ZPVE) are provided. For transition states, the imaginary frequency is given.

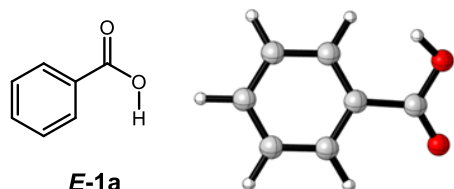

|   |              |              |              |
|---|--------------|--------------|--------------|
| 6 | -1.887838000 | -1.196161000 | 0.145423000  |
| 6 | -0.486404000 | -1.224983000 | 0.121509000  |
| 6 | 0.241804000  | -0.026138000 | -0.007883000 |
| 6 | -0.445650000 | 1.196516000  | -0.152074000 |
| 6 | -1.850185000 | 1.220018000  | -0.141478000 |
| 1 | -2.450089000 | -2.128843000 | 0.258727000  |
| 1 | 0.066195000  | -2.165262000 | 0.205201000  |
| 1 | 0.102075000  | 2.131965000  | -0.316342000 |
| 1 | -2.379345000 | 2.170529000  | -0.264690000 |
| 6 | 1.743833000  | -0.121196000 | -0.032888000 |
| 8 | 2.340949000  | -1.136182000 | -0.317100000 |
| 8 | 2.420672000  | 1.017907000  | 0.285710000  |
| 1 | 1.780736000  | 1.647868000  | 0.649580000  |
| 6 | -2.573042000 | 0.025895000  | 0.015682000  |
| 1 | -3.667647000 | 0.046240000  | 0.028900000  |

E = -419.618700 au ZPVE = 0.115519 au

For deuterated acid (**E-5a**): ZPVE = 0.112060175 au

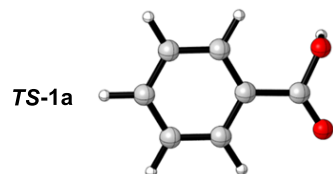

|   |              |              |              |
|---|--------------|--------------|--------------|
| 6 | 1.917806000  | 1.183191000  | -0.050175000 |
| 6 | 0.517359000  | 1.236958000  | -0.035482000 |
| 6 | -0.231406000 | 0.043092000  | 0.010649000  |
| 6 | 0.427152000  | -1.201812000 | 0.054143000  |
| 6 | 1.830447000  | -1.248549000 | 0.042496000  |
| 1 | 2.499251000  | 2.110223000  | -0.089022000 |
| 1 | -0.015658000 | 2.191905000  | -0.060439000 |

|   |              |              |              |
|---|--------------|--------------|--------------|
| 1 | -0.162545000 | -2.120095000 | 0.111328000  |
| 1 | 2.343156000  | -2.215354000 | 0.080257000  |
| 6 | -1.725319000 | 0.143275000  | 0.021973000  |
| 8 | -2.328250000 | 1.191255000  | 0.086624000  |
| 8 | -2.387811000 | -1.080893000 | 0.003015000  |
| 1 | -2.488677000 | -1.330798000 | -0.928012000 |
| 6 | 2.577485000  | -0.059340000 | -0.011920000 |
| 1 | 3.671818000  | -0.099668000 | -0.021323000 |

E = -419.609303 au    ZPVE = 0.114051 au     $\nu_1 = 563.02i \text{ cm}^{-1}$  For deuterated acid (**TS-5a**): ZPVE = 0.110967219 au     $\nu_1 = 394.28i \text{ cm}^{-1}$

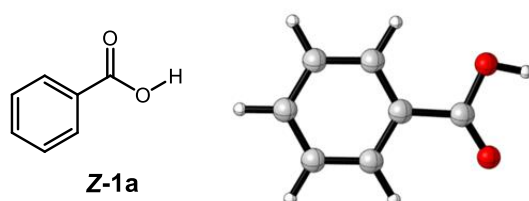

|   |              |              |              |
|---|--------------|--------------|--------------|
| 6 | 1.909138000  | 1.194908000  | 0.000277000  |
| 6 | 0.507344000  | 1.230532000  | 0.000227000  |
| 6 | -0.223538000 | 0.026826000  | 0.000022000  |
| 6 | 0.447399000  | -1.211868000 | -0.000229000 |
| 6 | 1.850926000  | -1.239124000 | -0.000250000 |
| 1 | 2.478733000  | 2.130042000  | 0.000520000  |
| 1 | -0.039617000 | 2.177765000  | 0.000355000  |
| 1 | -0.129075000 | -2.140318000 | -0.000299000 |
| 1 | 2.375667000  | -2.200185000 | -0.000592000 |
| 6 | -1.715178000 | 0.120914000  | -0.000044000 |
| 8 | -2.345271000 | 1.162627000  | -0.000602000 |
| 8 | -2.311934000 | -1.099674000 | 0.000579000  |
| 1 | -3.265625000 | -0.902027000 | 0.000319000  |
| 6 | 2.583748000  | -0.039314000 | -0.000026000 |
| 1 | 3.678531000  | -0.066158000 | 0.000018000  |

E = -419.629553 au    ZPVE = 0.115807 au  
For deuterated acid (**Z-5a**): ZPVE = 0.112342502 au

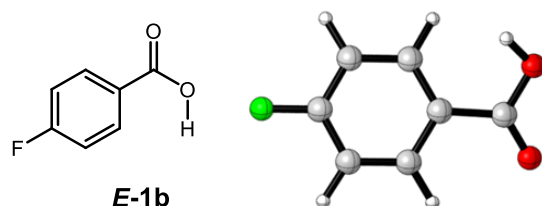

|   |              |              |              |
|---|--------------|--------------|--------------|
| 6 | -1.446013000 | -1.215298000 | 0.135566000  |
| 6 | -0.046196000 | -1.228168000 | 0.116899000  |
| 6 | 0.678122000  | -0.025869000 | -0.005803000 |
| 6 | -0.018455000 | 1.191277000  | -0.150489000 |
| 6 | -1.421492000 | 1.213208000  | -0.145946000 |

|   |              |              |              |
|---|--------------|--------------|--------------|
| 1 | -2.027187000 | -2.135601000 | 0.241826000  |
| 1 | 0.507548000  | -2.167491000 | 0.199943000  |
| 1 | 0.519646000  | 2.132458000  | -0.310490000 |
| 1 | -1.980939000 | 2.144757000  | -0.267933000 |
| 6 | 2.179233000  | -0.115369000 | -0.029808000 |
| 8 | 2.778546000  | -1.130895000 | -0.306929000 |
| 8 | 2.853222000  | 1.028080000  | 0.278947000  |
| 1 | 2.216269000  | 1.656251000  | 0.650736000  |
| 6 | -2.114432000 | 0.008297000  | 0.005100000  |
| 9 | -3.461565000 | 0.024852000  | 0.017407000  |

E = -518.651803 au    ZPVE = 0.107515 au

For deuterated acid (**E-5b**): ZPVE = 0.104060717 au

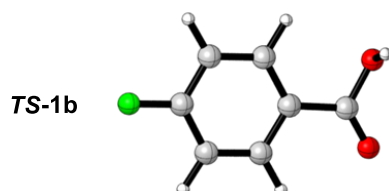

|   |              |              |              |
|---|--------------|--------------|--------------|
| 6 | 1.467389000  | 1.218437000  | 0.045646000  |
| 6 | 0.068152000  | 1.248317000  | 0.034234000  |
| 6 | -0.669050000 | 0.047049000  | -0.010305000 |
| 6 | 0.006566000  | -1.188617000 | -0.057226000 |
| 6 | 1.408271000  | -1.225849000 | -0.049291000 |
| 1 | 2.062182000  | 2.135411000  | 0.082949000  |
| 1 | -0.472075000 | 2.198834000  | 0.060855000  |
| 1 | -0.568503000 | -2.115762000 | -0.114778000 |
| 1 | 1.957751000  | -2.170532000 | -0.089265000 |
| 6 | -2.162149000 | 0.130052000  | -0.020065000 |
| 8 | -2.776796000 | 1.170992000  | -0.086163000 |
| 8 | -2.809051000 | -1.102295000 | 0.001201000  |
| 1 | -2.898407000 | -1.356431000 | 0.932370000  |
| 6 | 2.117486000  | -0.021442000 | 0.004294000  |
| 9 | 3.465094000  | -0.054309000 | 0.013761000  |

E = -518.642995 au    ZPVE = 0.10607700 au     $\nu_i = 529.37i \text{ cm}^{-1}$

For deuterated acid (**TS-5b**): ZPVE = 0.102992813 au     $\nu_i = 389.97i \text{ cm}^{-1}$

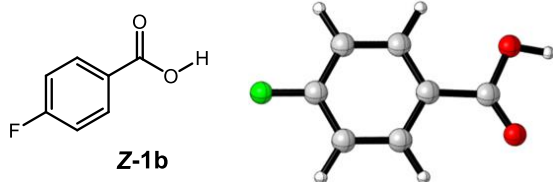

|   |              |              |              |
|---|--------------|--------------|--------------|
| 6 | 1.462691000  | 1.220017000  | 0.000201000  |
| 6 | 0.062385000  | 1.237406000  | 0.000160000  |
| 6 | -0.661587000 | 0.029537000  | 0.000053000  |
| 6 | 0.021427000  | -1.202529000 | -0.000122000 |
| 6 | 1.423203000  | -1.225996000 | -0.000146000 |
| 1 | 2.049319000  | 2.142924000  | 0.000332000  |

|   |              |              |              |
|---|--------------|--------------|--------------|
| 1 | -0.487841000 | 2.182419000  | 0.000256000  |
| 1 | -0.543748000 | -2.137567000 | -0.000167000 |
| 1 | 1.980519000  | -2.166895000 | -0.000447000 |
| 6 | -2.152128000 | 0.112435000  | -0.000029000 |
| 8 | -2.789251000 | 1.149748000  | -0.000417000 |
| 8 | -2.737994000 | -1.113154000 | 0.000370000  |
| 1 | -3.693658000 | -0.925312000 | 0.000096000  |
| 6 | 2.122652000  | -0.014298000 | -0.000005000 |
| 9 | 3.471279000  | -0.036417000 | -0.000040000 |

E = -518.663283 au      ZPVE = 0.107829 au

For deuterated acid (**Z-5b**): ZPVE = 0.104364382 au

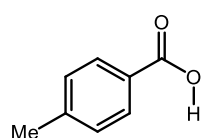

**E-1c**

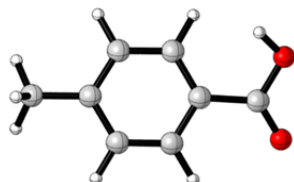

|   |              |              |              |
|---|--------------|--------------|--------------|
| 6 | -1.402316000 | -1.203344000 | 0.124404000  |
| 6 | -0.002271000 | -1.228029000 | 0.111580000  |
| 6 | 0.725097000  | -0.028008000 | -0.008660000 |
| 6 | 0.027147000  | 1.186979000  | -0.156719000 |
| 6 | -1.377110000 | 1.198952000  | -0.155841000 |
| 1 | -1.957338000 | -2.143187000 | 0.227759000  |
| 1 | 0.549695000  | -2.168809000 | 0.195734000  |
| 1 | 0.565057000  | 2.128634000  | -0.319433000 |
| 1 | -1.907833000 | 2.149078000  | -0.285893000 |
| 6 | 2.226300000  | -0.114763000 | -0.026131000 |
| 8 | 2.832073000  | -1.127773000 | -0.299349000 |
| 8 | 2.895020000  | 1.031242000  | 0.287601000  |
| 1 | 2.248273000  | 1.659636000  | 0.642009000  |
| 6 | -2.114372000 | 0.008400000  | -0.008001000 |
| 6 | -3.624742000 | 0.024353000  | 0.033583000  |
| 1 | -3.988264000 | -0.016097000 | 1.075442000  |
| 1 | -4.027408000 | 0.939974000  | -0.427974000 |
| 1 | -4.045315000 | -0.844217000 | -0.498955000 |

E = -458.804279 au      ZPVE = 0.143061 au

For deuterated acid (**E-5c**): ZPVE = 0.139601992 au

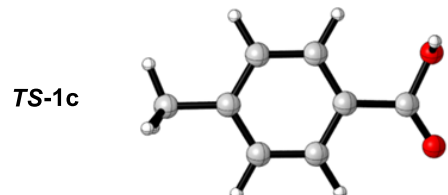

|   |              |             |              |
|---|--------------|-------------|--------------|
| 6 | 1.423438000  | 1.204259000 | 0.043647000  |
| 6 | 0.024881000  | 1.246287000 | 0.031941000  |
| 6 | -0.715574000 | 0.046732000 | -0.011607000 |

|   |              |              |              |
|---|--------------|--------------|--------------|
| 6 | -0.038735000 | -1.186566000 | -0.054755000 |
| 6 | 1.365068000  | -1.213894000 | -0.045505000 |
| 1 | 1.992156000  | 2.141104000  | 0.080816000  |
| 1 | -0.513671000 | 2.198282000  | 0.057728000  |
| 1 | -0.612879000 | -2.114978000 | -0.109793000 |
| 1 | 1.885939000  | -2.177651000 | -0.082738000 |
| 6 | -2.208631000 | 0.129932000  | -0.020221000 |
| 8 | -2.825090000 | 1.170529000  | -0.079664000 |
| 8 | -2.857164000 | -1.102916000 | -0.004304000 |
| 1 | -2.954221000 | -1.354985000 | 0.926486000  |
| 6 | 2.118055000  | -0.025121000 | 0.005623000  |
| 6 | 3.629054000  | -0.048876000 | 0.011317000  |
| 1 | 4.028366000  | 0.470798000  | 0.898901000  |
| 1 | 4.013175000  | -1.081017000 | 0.017424000  |
| 1 | 4.033821000  | 0.461035000  | -0.879728000 |

$E = -458.794799$  au     $ZPVE = 0.141478$  au     $\nu_i = 535.23i$   $\text{cm}^{-1}$

For deuterated acid (**TS-5c**):  $ZPVE = 0.138482629$  au     $\nu_i = 393.85i$   $\text{cm}^{-1}$

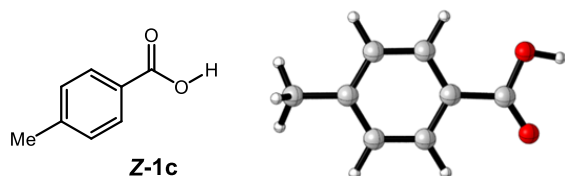

|   |              |              |              |
|---|--------------|--------------|--------------|
| 6 | 1.418209000  | 1.208433000  | -0.010124000 |
| 6 | 0.017537000  | 1.236149000  | -0.004076000 |
| 6 | -0.707938000 | 0.029861000  | 0.000240000  |
| 6 | -0.021966000 | -1.199579000 | -0.004186000 |
| 6 | 1.380871000  | -1.211357000 | -0.010071000 |
| 1 | 1.977235000  | 2.151522000  | -0.017158000 |
| 1 | -0.531983000 | 2.182094000  | -0.005028000 |
| 1 | -0.585412000 | -2.136212000 | -0.005505000 |
| 1 | 1.910735000  | -2.171082000 | -0.016995000 |
| 6 | -2.198860000 | 0.111188000  | 0.003327000  |
| 8 | -2.838965000 | 1.147000000  | 0.005290000  |
| 8 | -2.785753000 | -1.114808000 | 0.004442000  |
| 1 | -3.740816000 | -0.924187000 | 0.006867000  |
| 6 | 2.123603000  | -0.013234000 | -0.013769000 |
| 6 | 3.634534000  | -0.034887000 | 0.016920000  |
| 1 | 4.006589000  | 0.011722000  | 1.055729000  |
| 1 | 4.029524000  | -0.957138000 | -0.438715000 |
| 1 | 4.055921000  | 0.826305000  | -0.526617000 |

$E = -458.814926$  au     $ZPVE = 0.143328$  au

For deuterated acid (**Z-5c**):  $ZPVE = 0.139863474$  au

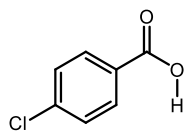

**E-1d**

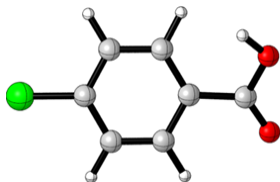

|    |              |              |              |
|----|--------------|--------------|--------------|
| 6  | -1.009816000 | -1.221651000 | 0.131024000  |
| 6  | 0.390226000  | -1.229791000 | 0.114244000  |
| 6  | 1.111997000  | -0.026159000 | -0.006950000 |
| 6  | 0.411197000  | 1.188121000  | -0.153217000 |
| 6  | -0.991869000 | 1.206625000  | -0.151408000 |
| 1  | -1.575109000 | -2.151834000 | 0.237830000  |
| 1  | 0.945716000  | -2.168344000 | 0.198584000  |
| 1  | 0.945941000  | 2.131790000  | -0.311925000 |
| 1  | -1.540066000 | 2.144723000  | -0.275344000 |
| 6  | 2.613972000  | -0.111313000 | -0.027470000 |
| 8  | 3.215213000  | -1.125745000 | -0.304436000 |
| 8  | 3.284022000  | 1.033232000  | 0.283274000  |
| 1  | 2.644903000  | 1.661111000  | 0.651975000  |
| 6  | -1.693708000 | 0.000083000  | -0.000440000 |
| 17 | -3.435721000 | 0.016892000  | 0.013734000  |

E = -878.670972 au    ZPVE = 0.105867 au

For deuterated acid (**E-5d**): ZPVE = 0.102413514 au

**TS-1d**

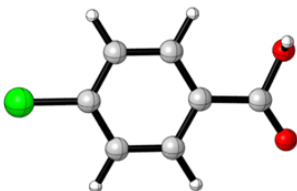

|    |              |              |              |
|----|--------------|--------------|--------------|
| 6  | 1.026834000  | 1.232241000  | 0.042195000  |
| 6  | -0.372778000 | 1.252987000  | 0.032561000  |
| 6  | -1.103406000 | 0.048058000  | -0.011497000 |
| 6  | -0.419730000 | -1.182789000 | -0.059694000 |
| 6  | 0.982246000  | -1.212438000 | -0.054064000 |
| 1  | 1.602908000  | 2.161185000  | 0.079681000  |
| 1  | -0.917814000 | 2.201100000  | 0.060385000  |
| 1  | -0.988691000 | -2.114123000 | -0.116900000 |
| 1  | 1.523584000  | -2.161885000 | -0.094966000 |
| 6  | -2.597719000 | 0.121956000  | -0.018160000 |
| 8  | -3.217175000 | 1.159992000  | -0.084441000 |
| 8  | -3.236643000 | -1.113878000 | 0.004790000  |
| 1  | -3.323129000 | -1.369150000 | 0.936000000  |
| 6  | 1.696252000  | -0.003978000 | -0.000374000 |
| 17 | 3.439029000  | -0.036603000 | 0.011012000  |

E = -878.662144 au    ZPVE = 0.104417 au     $\nu_i = 530.21i \text{ cm}^{-1}$

For deuterated acid (**TS-5d**): ZPVE = 0.101334518 au     $\nu_i = 390.50i \text{ cm}^{-1}$

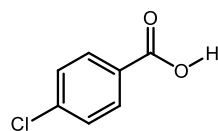

**Z-1d**

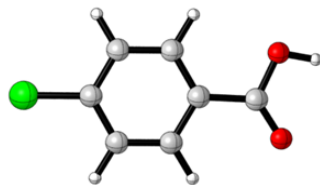

|    |              |              |              |
|----|--------------|--------------|--------------|
| 6  | 1.023860000  | 1.229122000  | 0.000225000  |
| 6  | -0.376626000 | 1.240162000  | 0.000183000  |
| 6  | -1.096457000 | 0.030103000  | 0.000064000  |
| 6  | -0.407731000 | -1.198487000 | -0.000140000 |
| 6  | 0.994245000  | -1.217185000 | -0.000145000 |
| 1  | 1.593531000  | 2.162701000  | 0.000376000  |
| 1  | -0.929784000 | 2.183834000  | 0.000286000  |
| 1  | -0.968313000 | -2.136651000 | -0.000169000 |
| 1  | 1.541609000  | -2.164023000 | -0.000481000 |
| 6  | -2.588100000 | 0.107226000  | -0.000034000 |
| 8  | -3.227777000 | 1.142869000  | -0.000463000 |
| 8  | -3.168198000 | -1.120454000 | 0.000399000  |
| 1  | -4.125020000 | -0.938111000 | 0.000121000  |
| 6  | 1.700745000  | -0.002765000 | -0.000017000 |
| 17 | 3.444480000  | -0.024478000 | -0.000025000 |

E = -878.682507 au      ZPVE = 0.106176 au

For deuterated acid (**Z-5d**): ZPVE = 0.102710869 au

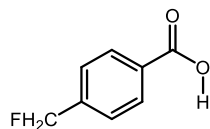

**E-1e**

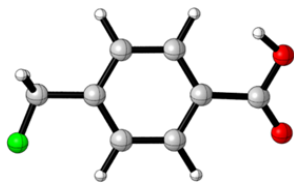

|   |              |              |              |
|---|--------------|--------------|--------------|
| 6 | -1.089508000 | -0.988162000 | 0.099111000  |
| 6 | 0.304317000  | -1.138276000 | 0.091487000  |
| 6 | 1.141150000  | -0.011805000 | -0.012571000 |
| 6 | 0.563834000  | 1.267998000  | -0.150095000 |
| 6 | -0.830913000 | 1.413350000  | -0.157504000 |
| 1 | -1.739372000 | -1.861847000 | 0.192894000  |
| 1 | 0.766222000  | -2.126878000 | 0.170053000  |
| 1 | 1.190647000  | 2.155473000  | -0.296431000 |
| 1 | -1.269145000 | 2.411532000  | -0.277756000 |
| 6 | 2.628367000  | -0.239623000 | -0.021874000 |
| 8 | 3.136608000  | -1.300072000 | -0.312049000 |
| 8 | 3.399649000  | 0.831841000  | 0.317834000  |
| 1 | 2.814648000  | 1.510389000  | 0.686651000  |
| 6 | -1.666622000 | 0.288759000  | -0.024158000 |
| 6 | -3.167701000 | 0.467680000  | -0.022811000 |
| 1 | -3.477780000 | 1.103391000  | 0.825344000  |
| 1 | -3.497173000 | 0.951044000  | -0.959442000 |
| 9 | -3.819517000 | -0.750753000 | 0.089211000  |



E = -557.829474 au    ZPVE = 0.136321 au  
 For deuterated acid (**E-5e**): ZPVE = 0.132863681 au

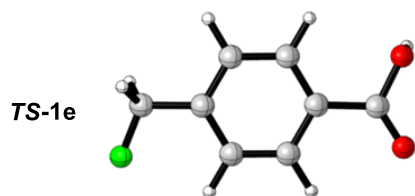

|   |              |              |              |
|---|--------------|--------------|--------------|
| 6 | -1.105182000 | -0.996169000 | -0.021101000 |
| 6 | 0.286974000  | -1.157798000 | -0.017392000 |
| 6 | 1.131690000  | -0.031228000 | 0.014058000  |
| 6 | 0.571352000  | 1.261784000  | 0.053832000  |
| 6 | -0.821522000 | 1.416860000  | 0.053164000  |
| 1 | -1.764186000 | -1.867616000 | -0.049400000 |
| 1 | 0.738692000  | -2.154022000 | -0.040140000 |
| 1 | 1.228694000  | 2.133600000  | 0.099363000  |
| 1 | -1.252883000 | 2.424866000  | 0.087650000  |
| 6 | 2.612290000  | -0.249177000 | 0.015373000  |
| 8 | 3.131304000  | -1.340526000 | 0.086702000  |
| 8 | 3.368583000  | 0.919542000  | -0.020848000 |
| 1 | 3.477924000  | 1.153447000  | -0.955108000 |
| 6 | -1.668500000 | 0.292536000  | 0.013970000  |
| 6 | -3.167567000 | 0.485580000  | 0.019057000  |
| 1 | -3.485984000 | 0.990702000  | 0.948167000  |
| 1 | -3.477781000 | 1.107642000  | -0.839106000 |
| 9 | -3.833420000 | -0.728341000 | -0.062669000 |

E = -557.820329 au    ZPVE = 0.134854 au     $\nu_i = 533.43i \text{ cm}^{-1}$   
 For deuterated acid (**TS-5e**): ZPVE = 0.131771267 au     $\nu_i = 392.70i \text{ cm}^{-1}$

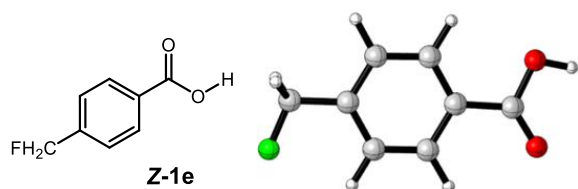

|   |              |              |              |
|---|--------------|--------------|--------------|
| 6 | -1.102062000 | -0.993435000 | 0.000022000  |
| 6 | 0.291972000  | -1.144828000 | 0.000037000  |
| 6 | 1.125539000  | -0.011830000 | 0.000040000  |
| 6 | 0.559127000  | 1.278784000  | 0.000018000  |
| 6 | -0.834692000 | 1.422237000  | -0.000031000 |
| 1 | -1.754505000 | -1.870211000 | 0.000053000  |
| 1 | 0.752936000  | -2.136946000 | 0.000019000  |
| 1 | 1.208475000  | 2.157798000  | 0.000004000  |
| 1 | -1.273281000 | 2.427696000  | -0.000071000 |
| 6 | 2.603262000  | -0.231536000 | 0.000002000  |
| 8 | 3.143163000  | -1.322530000 | -0.000093000 |
| 8 | 3.300034000  | 0.935096000  | 0.000064000  |

|   |              |              |              |
|---|--------------|--------------|--------------|
| 1 | 4.234025000  | 0.658904000  | -0.000047000 |
| 6 | -1.674131000 | 0.291007000  | -0.000013000 |
| 6 | -3.174394000 | 0.474338000  | -0.000060000 |
| 1 | -3.492797000 | 1.036978000  | 0.895401000  |
| 1 | -3.492744000 | 1.036818000  | -0.895640000 |
| 9 | -3.832824000 | -0.746666000 | 0.000048000  |

E = -557.840619 au    ZPVE = 0.13661 au

For deuterated acid (**Z-5e**): ZPVE = 0.133145227 au

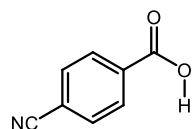

**E-1f**

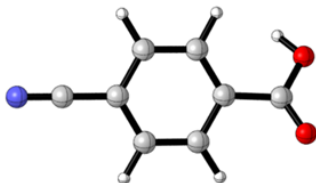

|   |              |              |              |
|---|--------------|--------------|--------------|
| 6 | -1.127363000 | 1.223633000  | 0.134553000  |
| 6 | 0.271405000  | 1.230794000  | 0.118205000  |
| 6 | 0.989622000  | 0.024283000  | -0.005213000 |
| 6 | 0.290336000  | -1.191045000 | -0.155854000 |
| 6 | -1.111126000 | -1.208028000 | -0.155062000 |
| 6 | -1.822997000 | 0.000709000  | -0.000847000 |
| 1 | -1.689737000 | 2.155850000  | 0.243868000  |
| 1 | 0.831356000  | 2.166394000  | 0.204014000  |
| 1 | 0.828098000  | -2.132714000 | -0.314451000 |
| 1 | -1.657991000 | -2.147186000 | -0.281360000 |
| 6 | 2.493833000  | 0.109317000  | -0.026847000 |
| 8 | 3.089797000  | 1.123972000  | -0.313432000 |
| 8 | 3.165122000  | -1.030823000 | 0.290337000  |
| 1 | 2.530811000  | -1.659592000 | 0.665931000  |
| 6 | -3.266542000 | -0.013519000 | 0.010563000  |
| 7 | -4.454985000 | -0.026402000 | 0.021396000  |

E = -511.625818 au    ZPVE = 0.113246 au

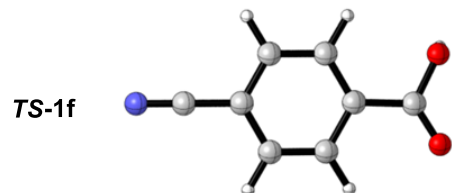

**TS-1f**

|   |              |              |              |
|---|--------------|--------------|--------------|
| 6 | -1.144771000 | 1.233766000  | 0.044384000  |
| 6 | 0.253632000  | 1.253737000  | 0.035357000  |
| 6 | 0.980928000  | 0.045987000  | -0.009713000 |
| 6 | 0.298927000  | -1.186362000 | -0.061164000 |
| 6 | -1.101835000 | -1.214705000 | -0.056324000 |
| 6 | -1.826442000 | -0.004044000 | -0.000739000 |
| 1 | -1.717895000 | 2.165076000  | 0.083102000  |
| 1 | 0.803132000  | 2.199037000  | 0.064560000  |

|   |              |              |              |
|---|--------------|--------------|--------------|
| 1 | 0.870201000  | -2.116040000 | -0.119027000 |
| 1 | -1.641446000 | -2.165643000 | -0.099619000 |
| 6 | 2.478470000  | 0.119160000  | -0.017191000 |
| 8 | 3.093056000  | 1.159522000  | -0.089927000 |
| 8 | 3.116569000  | -1.113690000 | 0.009309000  |
| 1 | 3.200885000  | -1.372215000 | 0.940024000  |
| 6 | -3.269754000 | -0.031089000 | 0.008177000  |
| 7 | -4.458116000 | -0.053654000 | 0.017026000  |

E = -511.61723 au    ZPVE = 0.111788 au     $\nu_1 = 531.30i \text{ cm}^{-1}$

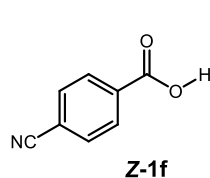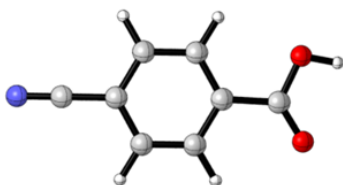

|   |              |              |              |
|---|--------------|--------------|--------------|
| 6 | 1.142067000  | 1.230826000  | -0.000350000 |
| 6 | -0.257065000 | 1.241602000  | -0.000266000 |
| 6 | -0.973867000 | 0.028752000  | -0.000078000 |
| 6 | -0.287168000 | -1.201868000 | 0.000191000  |
| 6 | 1.113414000  | -1.219623000 | 0.000309000  |
| 6 | 1.831137000  | -0.002969000 | 0.000001000  |
| 1 | 1.709135000  | 2.166596000  | -0.000511000 |
| 1 | -0.814498000 | 2.182562000  | -0.000393000 |
| 1 | -0.851026000 | -2.137850000 | 0.000137000  |
| 1 | 1.658985000  | -2.168114000 | 0.000499000  |
| 6 | -2.468045000 | 0.105857000  | 0.000031000  |
| 8 | -3.103658000 | 1.143622000  | 0.000685000  |
| 8 | -3.045442000 | -1.121180000 | -0.000559000 |
| 1 | -4.003467000 | -0.943996000 | -0.000291000 |
| 6 | 3.274696000  | -0.020810000 | 0.000010000  |
| 7 | 4.463237000  | -0.035620000 | 0.000068000  |

E = -511.637909 au    ZPVE = 0.113568 au

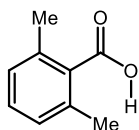

**E-2a**

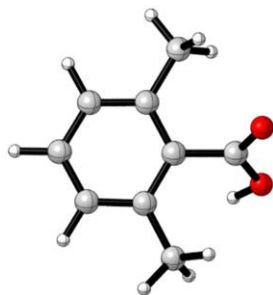

|   |              |              |              |
|---|--------------|--------------|--------------|
| 6 | -1.988381000 | 1.144792000  | -0.103848000 |
| 6 | -0.584909000 | 1.230466000  | -0.058931000 |
| 6 | 0.157551000  | 0.026795000  | 0.022265000  |
| 6 | -0.480003000 | -1.236110000 | 0.098008000  |

|   |              |              |              |
|---|--------------|--------------|--------------|
| 6 | -1.887892000 | -1.275890000 | 0.068709000  |
| 6 | -2.639783000 | -0.097366000 | -0.040254000 |
| 1 | -2.576498000 | 2.066358000  | -0.179101000 |
| 1 | -2.396205000 | -2.244151000 | 0.141405000  |
| 1 | -3.733560000 | -0.145205000 | -0.066227000 |
| 6 | 1.661008000  | 0.112729000  | 0.075420000  |
| 8 | 2.288487000  | 0.716239000  | 0.916913000  |
| 8 | 2.305552000  | -0.551359000 | -0.927722000 |
| 1 | 1.619732000  | -0.886660000 | -1.526246000 |
| 6 | 0.309274000  | -2.524695000 | 0.226665000  |
| 1 | 0.675058000  | -2.890679000 | -0.748975000 |
| 1 | 1.186100000  | -2.402883000 | 0.882665000  |
| 1 | -0.327579000 | -3.315686000 | 0.653099000  |
| 6 | 0.107405000  | 2.574956000  | -0.086499000 |
| 1 | 0.624672000  | 2.766095000  | 0.866843000  |
| 1 | 0.872095000  | 2.619399000  | -0.880336000 |
| 1 | -0.621740000 | 3.380307000  | -0.265866000 |

E = -497.985962 au    ZPVE = 0.171019 au

For deuterated acid (**E-6a**): ZPVE = 0.167541594 au

TS-2a

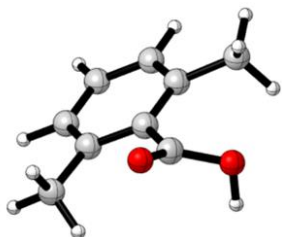

|   |              |              |              |
|---|--------------|--------------|--------------|
| 6 | 1.850743000  | 1.328456000  | -0.058701000 |
| 6 | 0.445142000  | 1.253788000  | -0.092140000 |
| 6 | -0.160969000 | -0.029098000 | -0.025683000 |
| 6 | 0.623357000  | -1.211228000 | 0.057941000  |
| 6 | 2.023751000  | -1.082385000 | 0.118030000  |
| 6 | 2.639666000  | 0.175523000  | 0.058214000  |
| 1 | 2.330196000  | 2.311485000  | -0.127382000 |
| 1 | 2.636728000  | -1.986710000 | 0.202620000  |
| 1 | 3.731268000  | 0.256729000  | 0.094668000  |
| 6 | -1.653998000 | -0.174163000 | -0.071406000 |
| 8 | -2.239102000 | -1.020798000 | -0.708995000 |
| 8 | -2.348559000 | 0.776550000  | 0.674930000  |
| 1 | -2.451257000 | 0.403839000  | 1.564235000  |
| 6 | 0.009622000  | -2.594996000 | 0.084734000  |
| 1 | -0.807907000 | -2.672525000 | 0.820050000  |
| 1 | -0.422981000 | -2.854405000 | -0.893874000 |
| 1 | 0.777059000  | -3.341334000 | 0.343894000  |
| 6 | -0.349080000 | 2.536991000  | -0.227921000 |
| 1 | -1.172974000 | 2.437912000  | -0.951763000 |
| 1 | -0.801550000 | 2.833167000  | 0.731052000  |
| 1 | 0.313295000  | 3.348501000  | -0.569392000 |

$E = -497.972269$  au     $ZPVE = 0.169752$  au     $\nu_i = 509.05i$   $\text{cm}^{-1}$   
 For deuterated acid (**TS-6a**):  $ZPVE = 0.166673498$  au     $\nu_i = 418.54i$   $\text{cm}^{-1}$

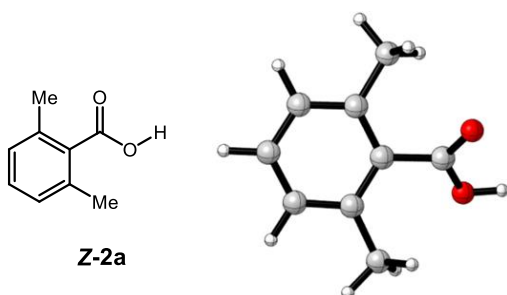

|   |              |              |              |
|---|--------------|--------------|--------------|
| 6 | 2.004996000  | 1.125115000  | 0.102225000  |
| 6 | 0.601432000  | 1.220552000  | 0.064223000  |
| 6 | -0.152512000 | 0.020637000  | -0.012977000 |
| 6 | 0.479404000  | -1.247447000 | -0.084517000 |
| 6 | 1.886865000  | -1.290278000 | -0.065762000 |
| 6 | 2.649460000  | -0.118350000 | 0.034696000  |
| 1 | 2.597475000  | 2.043746000  | 0.178184000  |
| 1 | 2.388151000  | -2.262375000 | -0.133558000 |
| 1 | 3.743061000  | -0.173695000 | 0.056003000  |
| 6 | -1.645885000 | 0.136634000  | -0.061637000 |
| 8 | -2.268409000 | 0.932190000  | -0.741372000 |
| 8 | -2.261383000 | -0.744291000 | 0.770854000  |
| 1 | -3.213197000 | -0.580317000 | 0.631940000  |
| 6 | -0.292305000 | -2.546258000 | -0.195918000 |
| 1 | -0.758203000 | -2.818498000 | 0.764098000  |
| 1 | -1.100760000 | -2.480032000 | -0.941572000 |
| 1 | 0.386210000  | -3.359301000 | -0.499325000 |
| 6 | -0.053181000 | 2.584536000  | 0.110185000  |
| 1 | -0.520549000 | 2.831580000  | -0.855472000 |
| 1 | -0.850430000 | 2.630554000  | 0.869910000  |
| 1 | 0.696930000  | 3.354300000  | 0.350830000  |

$E = -497.993031$  au     $ZPVE = 0.171518$  au  
 For deuterated acid (**Z-6a**):  $ZPVE = 0.168058167$  au

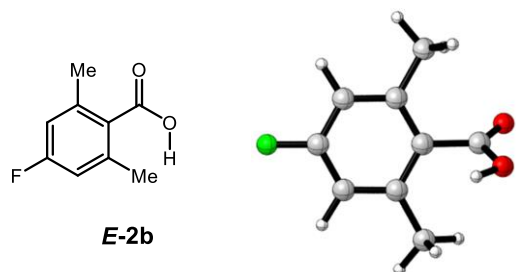

|   |              |              |              |
|---|--------------|--------------|--------------|
| 6 | -1.591495000 | 1.210071000  | 0.089321000  |
| 6 | -0.187415000 | 1.248887000  | 0.055253000  |
| 6 | 0.524539000  | 0.025755000  | -0.021207000 |
| 6 | -0.151666000 | -1.216409000 | -0.105822000 |

|   |              |              |              |
|---|--------------|--------------|--------------|
| 6 | -1.559048000 | -1.222757000 | -0.087579000 |
| 6 | -2.253684000 | -0.017829000 | 0.017653000  |
| 1 | -2.178489000 | 2.130887000  | 0.160058000  |
| 1 | -2.119795000 | -2.159296000 | -0.166256000 |
| 6 | 2.029431000  | 0.073299000  | -0.066324000 |
| 8 | 2.673960000  | 0.699545000  | -0.877895000 |
| 8 | 2.655574000  | -0.652483000 | 0.904747000  |
| 1 | 1.963559000  | -0.988610000 | 1.495375000  |
| 6 | 0.591147000  | -2.532526000 | -0.233856000 |
| 1 | 1.492418000  | -2.434410000 | -0.858997000 |
| 1 | 0.908685000  | -2.927687000 | 0.747351000  |
| 1 | -0.062493000 | -3.290548000 | -0.693009000 |
| 6 | 0.534062000  | 2.577560000  | 0.090463000  |
| 1 | 1.299973000  | 2.598651000  | 0.883550000  |
| 1 | 1.055332000  | 2.760054000  | -0.862091000 |
| 1 | -0.176795000 | 3.397718000  | 0.274437000  |
| 9 | -3.603765000 | -0.037730000 | 0.041929000  |

E = -597.019494 au    ZPVE = 0.163116 au  
 For deuterated acid (**E-6b**): ZPVE = 0.159637594 au

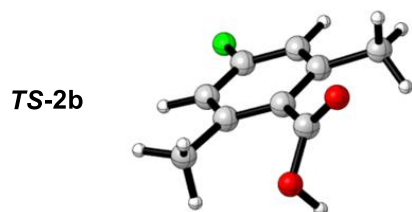

|   |              |              |              |
|---|--------------|--------------|--------------|
| 6 | -1.602102000 | 1.197505000  | -0.091356000 |
| 6 | -0.197923000 | 1.246998000  | -0.045640000 |
| 6 | 0.529416000  | 0.027340000  | 0.027829000  |
| 6 | -0.144929000 | -1.221798000 | 0.099259000  |
| 6 | -1.551044000 | -1.230548000 | 0.079466000  |
| 6 | -2.256434000 | -0.032271000 | -0.026847000 |
| 1 | -2.193579000 | 2.114874000  | -0.167126000 |
| 1 | -2.105691000 | -2.171098000 | 0.150941000  |
| 6 | 2.026924000  | 0.099005000  | 0.058983000  |
| 8 | 2.657985000  | 0.943161000  | 0.655070000  |
| 8 | 2.669311000  | -0.916061000 | -0.647417000 |
| 1 | 2.781433000  | -0.590391000 | -1.553825000 |
| 6 | 0.572819000  | -2.549975000 | 0.230329000  |
| 1 | 1.003608000  | -2.868852000 | -0.731100000 |
| 1 | 1.403553000  | -2.499165000 | 0.950523000  |
| 1 | -0.135100000 | -3.321624000 | 0.571954000  |
| 6 | 0.476763000  | 2.601773000  | -0.079443000 |
| 1 | 0.928808000  | 2.840002000  | 0.895506000  |
| 1 | 1.291306000  | 2.638989000  | -0.820475000 |
| 1 | -0.258112000 | 3.381678000  | -0.333016000 |
| 9 | -3.606171000 | -0.063264000 | -0.060009000 |

E = -597.006293 au    ZPVE = 0.161883 au     $\nu_i = 566.84i \text{ cm}^{-1}$

For deuterated acid (**ZS-6b**): ZPVE = 0.158808478 au  $\nu_i = 416.47i \text{ cm}^{-1}$

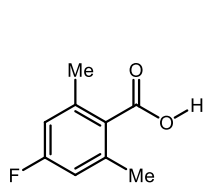

**Z-2b**

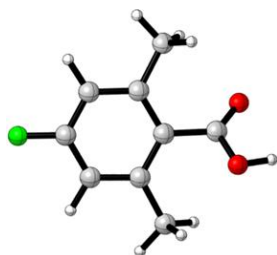

|   |              |              |              |
|---|--------------|--------------|--------------|
| 6 | -1.600706000 | 1.202773000  | 0.085634000  |
| 6 | -0.195935000 | 1.243420000  | 0.056138000  |
| 6 | 0.521296000  | 0.019710000  | -0.014831000 |
| 6 | -0.157115000 | -1.225156000 | -0.087769000 |
| 6 | -1.563664000 | -1.226242000 | -0.077222000 |
| 6 | -2.262171000 | -0.023083000 | 0.016596000  |
| 1 | -2.186833000 | 2.124007000  | 0.155607000  |
| 1 | -2.123225000 | -2.164044000 | -0.145537000 |
| 6 | 2.016667000  | 0.089314000  | -0.052259000 |
| 8 | 2.667531000  | 0.904149000  | -0.681060000 |
| 8 | 2.601816000  | -0.858037000 | 0.727502000  |
| 1 | 3.558508000  | -0.715913000 | 0.599150000  |
| 6 | 0.558561000  | -2.556110000 | -0.195559000 |
| 1 | 1.371875000  | -2.523644000 | -0.937266000 |
| 1 | 1.008991000  | -2.844684000 | 0.766758000  |
| 1 | -0.153228000 | -3.339473000 | -0.499820000 |
| 6 | 0.493323000  | 2.590068000  | 0.105748000  |
| 1 | 1.291802000  | 2.611910000  | 0.864490000  |
| 1 | 0.967493000  | 2.824999000  | -0.859338000 |
| 1 | -0.236957000 | 3.378008000  | 0.347437000  |
| 9 | -3.612750000 | -0.045358000 | 0.035347000  |

$E = -597.027054 \text{ au}$  ZPVE = 0.163669 au

For deuterated acid (**Z-6b**): ZPVE = 0.160206167 au

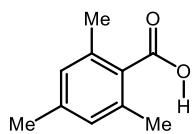

**E-2c**

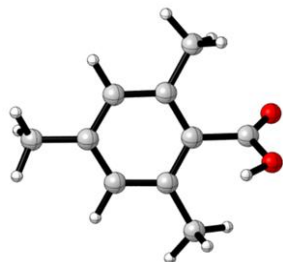

|   |              |              |              |
|---|--------------|--------------|--------------|
| 6 | -1.554765000 | 1.196528000  | 0.095392000  |
| 6 | -0.151139000 | 1.246880000  | 0.055138000  |
| 6 | 0.563105000  | 0.026110000  | -0.026020000 |
| 6 | -0.114918000 | -1.214180000 | -0.104245000 |
| 6 | -1.523198000 | -1.210071000 | -0.081076000 |
| 6 | -2.261470000 | -0.019785000 | 0.028416000  |
| 1 | -2.114243000 | 2.137168000  | 0.174741000  |

|   |              |              |              |
|---|--------------|--------------|--------------|
| 1 | -2.055713000 | -2.166641000 | -0.154844000 |
| 6 | 2.067681000  | 0.072525000  | -0.069577000 |
| 8 | 2.715940000  | 0.691838000  | -0.883699000 |
| 8 | 2.690764000  | -0.647237000 | 0.908952000  |
| 1 | 1.994046000  | -0.983842000 | 1.493825000  |
| 6 | 0.627110000  | -2.531331000 | -0.231160000 |
| 1 | 1.521024000  | -2.439135000 | -0.868370000 |
| 1 | 0.957850000  | -2.922345000 | 0.747667000  |
| 1 | -0.031995000 | -3.292690000 | -0.677589000 |
| 6 | 0.570397000  | 2.575967000  | 0.091729000  |
| 1 | 1.332125000  | 2.601138000  | 0.889241000  |
| 1 | 1.096933000  | 2.759933000  | -0.857865000 |
| 1 | -0.142369000 | 3.396084000  | 0.270817000  |
| 6 | -3.773104000 | -0.033341000 | 0.026828000  |
| 1 | -4.177542000 | 0.703010000  | 0.740788000  |
| 1 | -4.168051000 | 0.221472000  | -0.972408000 |
| 1 | -4.163900000 | -1.026779000 | 0.299420000  |

E = -537.17139 au      ZPVE = 0.19858 au

For deuterated acid (**E-6c**): ZPVE = 0.195101355 au

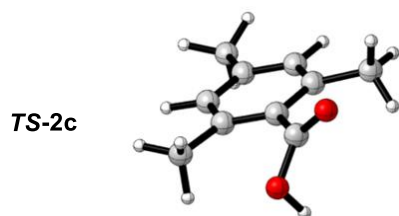

|   |              |              |              |
|---|--------------|--------------|--------------|
| 6 | -1.562913000 | 1.190115000  | -0.080409000 |
| 6 | -0.158116000 | 1.246414000  | -0.041086000 |
| 6 | 0.567322000  | 0.026849000  | 0.028405000  |
| 6 | -0.112300000 | -1.217698000 | 0.105459000  |
| 6 | -1.519147000 | -1.211234000 | 0.093580000  |
| 6 | -2.265536000 | -0.024954000 | -0.010639000 |
| 1 | -2.124649000 | 2.129839000  | -0.151559000 |
| 1 | -2.048065000 | -2.169061000 | 0.175647000  |
| 6 | 2.065080000  | 0.092455000  | 0.053695000  |
| 8 | 2.704057000  | 0.926494000  | 0.655690000  |
| 8 | 2.700012000  | -0.917427000 | -0.669007000 |
| 1 | 2.811255000  | -0.577889000 | -1.570324000 |
| 6 | 0.603333000  | -2.547352000 | 0.235472000  |
| 1 | 1.031168000  | -2.870517000 | -0.726117000 |
| 1 | 1.436468000  | -2.499762000 | 0.953836000  |
| 1 | -0.105534000 | -3.317161000 | 0.580513000  |
| 6 | 0.521095000  | 2.599260000  | -0.075564000 |
| 1 | 0.982285000  | 2.835630000  | 0.895810000  |
| 1 | 1.329470000  | 2.638857000  | -0.823859000 |
| 1 | -0.213887000 | 3.382274000  | -0.320791000 |
| 6 | -3.775034000 | -0.057798000 | -0.077088000 |
| 1 | -4.212384000 | 0.864982000  | 0.337532000  |
| 1 | -4.121623000 | -0.151897000 | -1.121616000 |



1 -4.179755000 -0.914161000 0.486519000

E = -537.157774 au ZPVE = 0.197333 au  $\nu_i = 568.81i \text{ cm}^{-1}$

For deuterated acid (**TS-6c**): ZPVE = 0.194256813 au  $\nu_i = 417.91i \text{ cm}^{-1}$

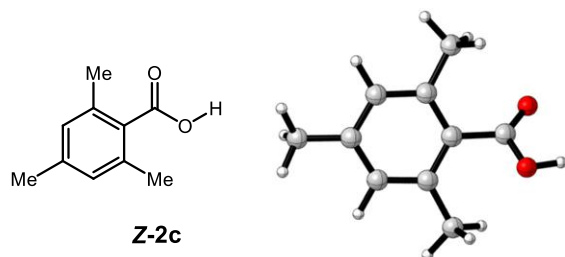

|   |              |              |              |
|---|--------------|--------------|--------------|
| 6 | -1.562782000 | 1.191986000  | 0.094878000  |
| 6 | -0.157895000 | 1.241664000  | 0.059278000  |
| 6 | 0.558717000  | 0.019432000  | -0.016611000 |
| 6 | -0.123075000 | -1.222252000 | -0.086237000 |
| 6 | -1.530263000 | -1.210631000 | -0.070617000 |
| 6 | -2.270706000 | -0.020580000 | 0.028740000  |
| 1 | -2.119929000 | 2.133790000  | 0.174285000  |
| 1 | -2.063195000 | -2.167567000 | -0.134846000 |
| 6 | 2.054127000  | 0.085654000  | -0.057395000 |
| 8 | 2.706627000  | 0.886142000  | -0.702935000 |
| 8 | 2.639032000  | -0.847886000 | 0.740007000  |
| 1 | 3.595529000  | -0.709054000 | 0.606817000  |
| 6 | 0.591907000  | -2.553920000 | -0.192893000 |
| 1 | 1.402141000  | -2.526003000 | -0.938878000 |
| 1 | 1.046867000  | -2.842701000 | 0.767534000  |
| 1 | -0.121846000 | -3.337840000 | -0.492469000 |
| 6 | 0.535504000  | 2.586472000  | 0.110040000  |
| 1 | 1.332047000  | 2.608700000  | 0.871502000  |
| 1 | 1.012907000  | 2.822524000  | -0.853457000 |
| 1 | -0.193515000 | 3.376632000  | 0.350037000  |
| 6 | -3.782151000 | -0.039855000 | 0.017750000  |
| 1 | -4.194820000 | 0.797428000  | 0.603995000  |
| 1 | -4.170025000 | 0.050800000  | -1.012484000 |
| 1 | -4.171726000 | -0.980568000 | 0.439783000  |

E = -537.178459 au ZPVE = 0.199115 au

For deuterated acid (**Z-6c**): ZPVE = 0.195652175 au

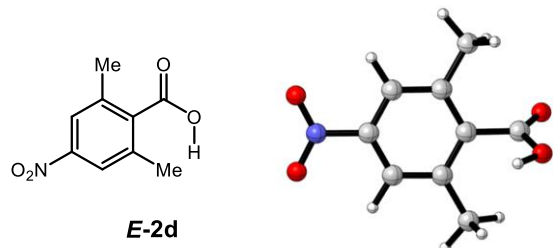

|   |              |             |             |
|---|--------------|-------------|-------------|
| 6 | -0.973760000 | 1.230323000 | 0.062022000 |
|---|--------------|-------------|-------------|

|   |              |              |              |
|---|--------------|--------------|--------------|
| 6 | 0.430744000  | 1.254921000  | 0.036564000  |
| 6 | 1.131082000  | 0.023675000  | -0.020356000 |
| 6 | 0.450030000  | -1.217046000 | -0.096939000 |
| 6 | -0.956418000 | -1.217157000 | -0.087074000 |
| 1 | -1.555611000 | 2.153338000  | 0.118350000  |
| 1 | -1.524498000 | -2.148065000 | -0.155208000 |
| 6 | 2.637883000  | 0.055244000  | -0.065901000 |
| 8 | 3.283016000  | 0.597395000  | -0.934928000 |
| 8 | 3.254924000  | -0.582727000 | 0.967929000  |
| 1 | 2.560786000  | -0.866857000 | 1.583409000  |
| 6 | 1.172300000  | 2.571543000  | 0.060577000  |
| 1 | 1.923533000  | 2.592122000  | 0.867809000  |
| 1 | 1.713050000  | 2.724526000  | -0.886563000 |
| 1 | 0.473102000  | 3.407054000  | 0.215436000  |
| 6 | 1.198895000  | -2.530192000 | -0.198968000 |
| 1 | 2.073552000  | -2.445069000 | -0.863453000 |
| 1 | 1.561369000  | -2.875679000 | 0.784632000  |
| 1 | 0.537233000  | -3.313209000 | -0.600018000 |
| 6 | -1.638547000 | 0.000252000  | -0.000391000 |
| 7 | -3.119000000 | -0.012797000 | 0.017844000  |
| 8 | -3.675558000 | -1.111160000 | -0.051893000 |
| 8 | -3.692728000 | 1.075498000  | 0.103079000  |

E = -702.013457 au    ZPVE = 0.173673 au

TS-2d

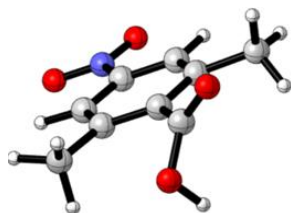

|   |              |              |              |
|---|--------------|--------------|--------------|
| 6 | -0.978923000 | 1.225736000  | -0.066014000 |
| 6 | 0.425860000  | 1.256289000  | -0.030489000 |
| 6 | 1.136697000  | 0.026016000  | 0.030112000  |
| 6 | 0.453141000  | -1.218199000 | 0.101919000  |
| 6 | -0.952843000 | -1.216094000 | 0.093388000  |
| 1 | -1.562005000 | 2.147189000  | -0.132032000 |
| 1 | -1.517592000 | -2.148819000 | 0.162115000  |
| 6 | 2.637991000  | 0.075434000  | 0.053560000  |
| 8 | 3.279943000  | 0.861678000  | 0.712865000  |
| 8 | 3.255271000  | -0.891674000 | -0.732262000 |
| 1 | 3.361280000  | -0.507071000 | -1.616383000 |
| 6 | 1.126178000  | 2.597073000  | -0.057660000 |
| 1 | 1.595625000  | 2.810840000  | 0.914781000  |
| 1 | 1.930444000  | 2.625626000  | -0.810517000 |
| 1 | 0.404516000  | 3.394866000  | -0.290746000 |
| 6 | 1.171228000  | -2.546379000 | 0.213592000  |
| 1 | 1.589322000  | -2.853572000 | -0.757147000 |
| 1 | 2.011044000  | -2.498604000 | 0.923920000  |
| 1 | 0.468700000  | -3.321244000 | 0.557711000  |
| 6 | -1.641388000 | -0.003448000 | -0.002188000 |

|   |              |              |              |
|---|--------------|--------------|--------------|
| 7 | -3.120859000 | -0.020941000 | -0.028064000 |
| 8 | -3.675303000 | -1.120113000 | 0.048820000  |
| 8 | -3.697782000 | 1.064960000  | -0.125994000 |

E = -702.000379 au    ZPVE = 0.1724 au     $\nu_i = 569.38i \text{ cm}^{-1}$

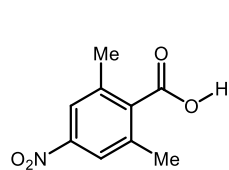

**Z-2d**

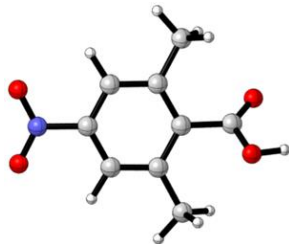

|   |              |              |              |
|---|--------------|--------------|--------------|
| 6 | -0.979967000 | 1.225157000  | 0.068373000  |
| 6 | 0.424939000  | 1.250909000  | 0.044652000  |
| 6 | 1.129321000  | 0.018798000  | -0.015455000 |
| 6 | 0.445079000  | -1.223223000 | -0.086107000 |
| 6 | -0.961124000 | -1.217672000 | -0.082167000 |
| 1 | -1.560214000 | 2.148618000  | 0.130511000  |
| 1 | -1.528399000 | -2.149102000 | -0.146211000 |
| 6 | 2.627831000  | 0.071619000  | -0.052793000 |
| 8 | 3.282980000  | 0.827300000  | -0.746449000 |
| 8 | 3.194288000  | -0.815649000 | 0.803602000  |
| 1 | 4.155025000  | -0.698116000 | 0.678066000  |
| 6 | 1.136461000  | 2.584892000  | 0.087754000  |
| 1 | 1.923808000  | 2.599282000  | 0.858555000  |
| 1 | 1.627419000  | 2.796159000  | -0.874445000 |
| 1 | 0.418173000  | 3.389044000  | 0.309145000  |
| 6 | 1.163839000  | -2.552212000 | -0.179454000 |
| 1 | 1.979096000  | -2.521607000 | -0.919550000 |
| 1 | 1.611330000  | -2.827284000 | 0.788150000  |
| 1 | 0.456100000  | -3.340724000 | -0.478366000 |
| 6 | -1.645928000 | -0.002227000 | 0.002045000  |
| 7 | -3.125512000 | -0.015126000 | 0.016633000  |
| 8 | -3.682979000 | -1.113026000 | -0.057262000 |
| 8 | -3.700098000 | 1.073046000  | 0.102187000  |

E = -702.021397 au    ZPVE = 0.174228 au

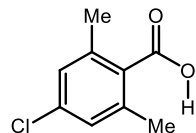

**E-2e**

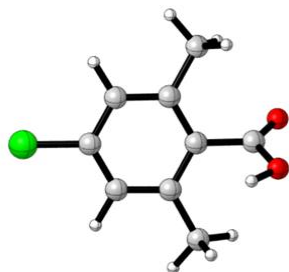

|   |              |             |             |
|---|--------------|-------------|-------------|
| 6 | -1.213104000 | 1.221123000 | 0.078755000 |
| 6 | 0.191693000  | 1.251731000 | 0.049706000 |

|    |              |              |              |
|----|--------------|--------------|--------------|
| 6  | 0.897152000  | 0.025194000  | -0.022666000 |
| 6  | 0.214664000  | -1.212971000 | -0.110026000 |
| 6  | -1.192891000 | -1.212244000 | -0.097923000 |
| 1  | -1.781974000 | 2.153507000  | 0.147698000  |
| 1  | -1.744711000 | -2.154053000 | -0.178515000 |
| 6  | 2.402852000  | 0.062836000  | -0.062118000 |
| 8  | 3.053240000  | 0.668847000  | -0.884088000 |
| 8  | 3.019565000  | -0.647857000 | 0.925309000  |
| 1  | 2.322971000  | -0.970840000 | 1.518064000  |
| 6  | 0.921957000  | 2.575562000  | 0.087051000  |
| 1  | 1.679765000  | 2.593741000  | 0.888137000  |
| 1  | 1.453641000  | 2.750452000  | -0.861232000 |
| 1  | 0.215406000  | 3.401592000  | 0.260914000  |
| 6  | 0.953442000  | -2.531750000 | -0.232763000 |
| 1  | 1.848519000  | -2.439745000 | -0.868025000 |
| 1  | 1.280740000  | -2.917684000 | 0.748743000  |
| 1  | 0.294558000  | -3.293014000 | -0.678801000 |
| 6  | -1.893018000 | -0.003514000 | 0.005163000  |
| 17 | -3.638109000 | -0.020452000 | 0.030716000  |

E = -957.039175 au    ZPVE = 0.16144161 au  
 For deuterated acid (**E-6e**): ZPVE = 0.157966183 au

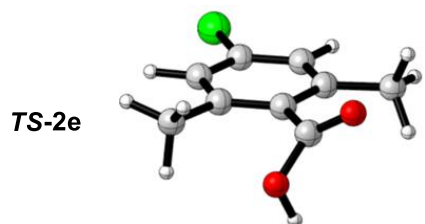

|    |              |              |              |
|----|--------------|--------------|--------------|
| 6  | -1.189155000 | 1.213017000  | -0.095859000 |
| 6  | 0.217469000  | 1.216145000  | -0.107303000 |
| 6  | 0.902303000  | -0.026230000 | -0.030047000 |
| 6  | 0.185970000  | -1.251886000 | 0.040189000  |
| 6  | -1.219193000 | -1.215365000 | 0.079017000  |
| 1  | -1.738047000 | 2.156718000  | -0.172044000 |
| 1  | -1.789496000 | -2.146323000 | 0.153324000  |
| 6  | 2.401425000  | -0.082723000 | -0.052433000 |
| 8  | 3.042946000  | -0.910384000 | -0.660079000 |
| 8  | 3.027791000  | 0.926611000  | 0.674591000  |
| 1  | 3.135800000  | 0.589022000  | 1.577219000  |
| 6  | 0.926501000  | 2.549287000  | -0.234431000 |
| 1  | 1.349090000  | 2.870987000  | 0.729698000  |
| 1  | 1.761744000  | 2.503302000  | -0.949994000 |
| 1  | 0.215723000  | 3.316069000  | -0.580975000 |
| 6  | 0.874532000  | -2.599603000 | 0.077256000  |
| 1  | 1.682037000  | -2.629657000 | 0.826502000  |
| 1  | 0.145893000  | -3.388061000 | 0.322067000  |
| 1  | 1.338024000  | -2.830241000 | -0.894164000 |
| 6  | -1.895776000 | 0.008672000  | 0.009577000  |
| 17 | -3.640654000 | 0.032969000  | 0.044498000  |

$E = -957.025984$  au     $ZPVE = 0.16019898$  au     $\nu_i = 567.41i$   $\text{cm}^{-1}$   
 For deuterated acid (**TS-6e**):  $ZPVE = 0.157123076$  au     $\nu_i = 417.00i$   $\text{cm}^{-1}$

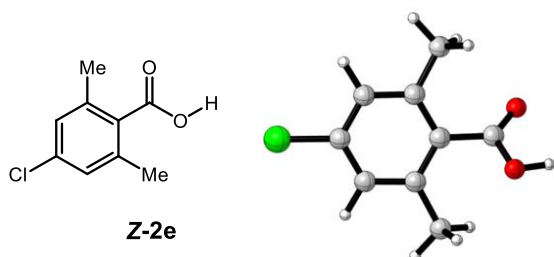

|    |              |              |              |
|----|--------------|--------------|--------------|
| 6  | -1.220200000 | 1.215707000  | 0.079279000  |
| 6  | 0.185212000  | 1.246794000  | 0.053510000  |
| 6  | 0.894452000  | 0.019010000  | -0.015449000 |
| 6  | 0.208725000  | -1.220915000 | -0.092553000 |
| 6  | -1.198217000 | -1.213719000 | -0.086950000 |
| 1  | -1.787375000 | 2.148913000  | 0.148826000  |
| 1  | -1.749889000 | -2.156092000 | -0.158597000 |
| 6  | 2.391126000  | 0.077758000  | -0.049685000 |
| 8  | 3.047956000  | 0.875835000  | -0.693051000 |
| 8  | 2.965095000  | -0.858682000 | 0.750199000  |
| 1  | 3.923835000  | -0.727205000 | 0.625064000  |
| 6  | 0.885382000  | 2.587699000  | 0.105320000  |
| 1  | 1.678629000  | 2.603667000  | 0.869811000  |
| 1  | 1.367374000  | 2.816518000  | -0.857375000 |
| 1  | 0.160576000  | 3.382440000  | 0.340956000  |
| 6  | 0.918637000  | -2.555075000 | -0.198073000 |
| 1  | 1.732900000  | -2.526054000 | -0.939075000 |
| 1  | 1.366130000  | -2.844384000 | 0.765376000  |
| 1  | 0.204228000  | -3.335688000 | -0.503080000 |
| 6  | -1.900686000 | -0.006150000 | 0.006317000  |
| 17 | -3.646317000 | -0.023882000 | 0.025918000  |

$E = -957.046777$  au     $ZPVE = 0.161985179$  au  
 For deuterated acid (**Z-6e**):  $ZPVE = 0.15852588$  au

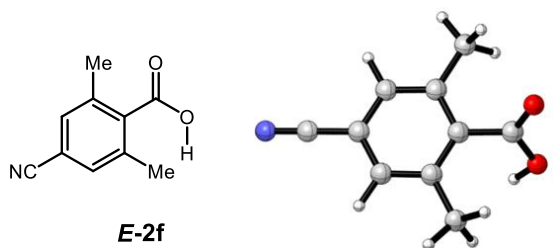

|   |              |              |              |
|---|--------------|--------------|--------------|
| 6 | 1.320776000  | 1.223735000  | 0.074582000  |
| 6 | -0.082694000 | 1.253401000  | 0.047286000  |
| 6 | -0.783016000 | 0.023261000  | -0.020670000 |
| 6 | -0.104084000 | -1.217720000 | -0.105856000 |
| 6 | 1.301494000  | -1.215715000 | -0.094281000 |
| 6 | 2.012829000  | -0.003357000 | 0.003875000  |

|   |              |              |              |
|---|--------------|--------------|--------------|
| 1 | 1.887421000  | 2.158423000  | 0.140114000  |
| 1 | 1.852189000  | -2.159256000 | -0.170219000 |
| 6 | -2.290133000 | 0.055780000  | -0.065714000 |
| 8 | -2.935094000 | 0.599691000  | -0.933480000 |
| 8 | -2.906458000 | -0.583862000 | 0.967470000  |
| 1 | -2.211734000 | -0.869268000 | 1.581737000  |
| 6 | -0.855691000 | -2.528554000 | -0.219674000 |
| 1 | -1.229699000 | -2.877284000 | 0.758357000  |
| 1 | -1.723230000 | -2.437897000 | -0.892875000 |
| 1 | -0.193528000 | -3.312636000 | -0.618162000 |
| 6 | -0.824284000 | 2.570113000  | 0.080616000  |
| 1 | -1.364072000 | 2.731312000  | -0.865709000 |
| 1 | -1.575852000 | 2.585242000  | 0.887690000  |
| 1 | -0.125674000 | 3.404974000  | 0.242658000  |
| 6 | 3.455820000  | -0.017568000 | 0.024927000  |
| 7 | 4.644355000  | -0.030069000 | 0.044851000  |

E = -589.995049 au    ZPVE = 0.168803108 au  
 For deuterated acid (**E-6f**): ZPVE = 0.165334359 au

TS-2f

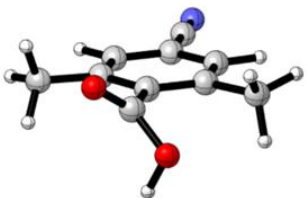

|   |              |              |              |
|---|--------------|--------------|--------------|
| 6 | 1.297031000  | 1.216250000  | -0.098992000 |
| 6 | -0.108050000 | 1.219342000  | -0.110032000 |
| 6 | -0.788539000 | -0.025484000 | -0.028733000 |
| 6 | -0.076549000 | -1.253883000 | 0.043767000  |
| 6 | 1.327142000  | -1.216777000 | 0.082003000  |
| 6 | 2.015903000  | 0.009771000  | 0.009292000  |
| 1 | 1.843779000  | 2.161855000  | -0.176210000 |
| 1 | 1.895671000  | -2.149424000 | 0.158059000  |
| 6 | -2.290151000 | -0.077533000 | -0.054095000 |
| 8 | -2.929374000 | -0.869656000 | -0.708582000 |
| 8 | -2.910111000 | 0.894471000  | 0.723548000  |
| 1 | -3.017289000 | 0.516175000  | 1.610253000  |
| 6 | -0.775064000 | -2.595670000 | 0.081204000  |
| 1 | -1.579414000 | -2.619846000 | 0.834170000  |
| 1 | -1.243397000 | -2.819144000 | -0.889554000 |
| 1 | -0.052885000 | -3.391018000 | 0.321768000  |
| 6 | -0.829035000 | 2.545095000  | -0.234628000 |
| 1 | -1.665283000 | 2.489991000  | -0.948735000 |
| 1 | -1.252295000 | 2.859618000  | 0.731455000  |
| 1 | -0.127666000 | 3.319576000  | -0.582497000 |
| 6 | 3.458404000  | 0.030012000  | 0.038547000  |
| 7 | 4.646872000  | 0.046708000  | 0.064511000  |

E = -589.981985 au    ZPVE = 0.167554741 au     $\nu_i = 568.63i \text{ cm}^{-1}$

For deuterated acid (**ZS-6f**): ZPVE = 0.164481833 au  $\nu_i = 418.32i \text{ cm}^{-1}$

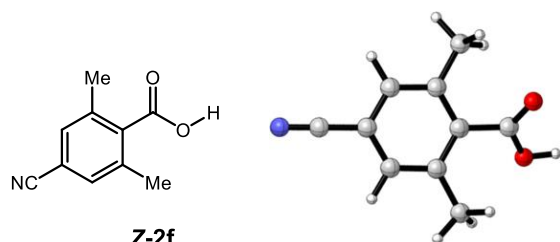

**Z-2f**

|   |              |              |              |
|---|--------------|--------------|--------------|
| 6 | 1.328098000  | 1.217781000  | 0.081654000  |
| 6 | -0.075827000 | 1.248976000  | 0.056178000  |
| 6 | -0.780418000 | 0.018212000  | -0.014617000 |
| 6 | -0.098633000 | -1.224035000 | -0.094378000 |
| 6 | 1.306736000  | -1.216679000 | -0.088642000 |
| 6 | 2.020949000  | -0.006551000 | 0.006633000  |
| 1 | 1.893184000  | 2.152866000  | 0.152528000  |
| 1 | 1.856442000  | -2.160889000 | -0.160626000 |
| 6 | -2.279267000 | 0.072607000  | -0.053491000 |
| 8 | -2.932507000 | 0.829397000  | -0.747331000 |
| 8 | -2.847105000 | -0.814927000 | 0.801678000  |
| 1 | -3.807703000 | -0.696762000 | 0.675174000  |
| 6 | -0.820343000 | -2.550774000 | -0.199341000 |
| 1 | -1.272307000 | -2.832464000 | 0.764226000  |
| 1 | -1.632272000 | -2.513225000 | -0.942918000 |
| 1 | -0.114238000 | -3.339639000 | -0.501828000 |
| 6 | -0.787134000 | 2.583002000  | 0.109022000  |
| 1 | -1.279283000 | 2.801854000  | -0.850843000 |
| 1 | -1.573003000 | 2.592700000  | 0.881507000  |
| 1 | -0.069057000 | 3.386162000  | 0.335453000  |
| 6 | 3.463800000  | -0.021177000 | 0.022852000  |
| 7 | 4.652482000  | -0.033505000 | 0.036761000  |

E = -590.002973 au ZPVE = 0.169363283 au

For deuterated acid (**Z-6f**): ZPVE = 0.165902789 au

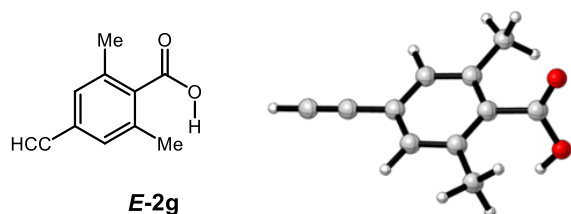

**E-2g**

|   |              |              |              |
|---|--------------|--------------|--------------|
| 6 | 1.303095000  | 1.219783000  | 0.076685000  |
| 6 | -0.099988000 | 1.252860000  | 0.047836000  |
| 6 | -0.803939000 | 0.024721000  | -0.023605000 |
| 6 | -0.121778000 | -1.214706000 | -0.109823000 |
| 6 | 1.283780000  | -1.210114000 | -0.097939000 |
| 6 | 2.007060000  | -0.002987000 | 0.004482000  |
| 1 | 1.867832000  | 2.155834000  | 0.145600000  |
| 1 | 1.832190000  | -2.155156000 | -0.177692000 |

|   |              |              |              |
|---|--------------|--------------|--------------|
| 6 | -2.309771000 | 0.059406000  | -0.061513000 |
| 8 | -2.963174000 | 0.646888000  | -0.894521000 |
| 8 | -2.922403000 | -0.631462000 | 0.942680000  |
| 1 | -2.222252000 | -0.944745000 | 1.536624000  |
| 6 | -0.865754000 | -2.530446000 | -0.230322000 |
| 1 | -1.211559000 | -2.904755000 | 0.749214000  |
| 1 | -1.750411000 | -2.439450000 | -0.880618000 |
| 1 | -0.204465000 | -3.299655000 | -0.658873000 |
| 6 | -0.835642000 | 2.573541000  | 0.084696000  |
| 1 | -1.372429000 | 2.744261000  | -0.861606000 |
| 1 | -1.589708000 | 2.591553000  | 0.889508000  |
| 1 | -0.131505000 | 3.402909000  | 0.252784000  |
| 6 | 3.446395000  | -0.016806000 | 0.025046000  |
| 6 | 4.681460000  | -0.028077000 | 0.044581000  |
| 1 | 5.757413000  | -0.037255000 | 0.059047000  |

E = -573.90906 au      ZPVE = 0.179041641 au

TS-2g

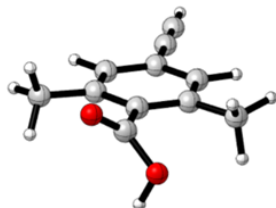

|   |              |              |              |
|---|--------------|--------------|--------------|
| 6 | 1.280649000  | 1.210687000  | -0.097752000 |
| 6 | -0.124229000 | 1.217932000  | -0.108548000 |
| 6 | -0.809015000 | -0.025100000 | -0.030147000 |
| 6 | -0.094392000 | -1.252504000 | 0.040832000  |
| 6 | 1.309013000  | -1.213555000 | 0.079513000  |
| 6 | 2.010572000  | 0.008276000  | 0.009243000  |
| 1 | 1.826126000  | 2.157440000  | -0.175076000 |
| 1 | 1.874856000  | -2.148297000 | 0.155164000  |
| 6 | -2.308396000 | -0.079075000 | -0.051861000 |
| 8 | -2.952291000 | -0.893306000 | -0.674984000 |
| 8 | -2.931453000 | 0.917237000  | 0.696200000  |
| 1 | -3.040172000 | 0.561099000  | 1.591590000  |
| 6 | -0.788700000 | -2.597131000 | 0.079026000  |
| 1 | -1.593569000 | -2.625360000 | 0.831471000  |
| 1 | -1.256431000 | -2.825808000 | -0.890879000 |
| 1 | -0.062298000 | -3.388627000 | 0.320864000  |
| 6 | -0.837975000 | 2.548381000  | -0.234587000 |
| 1 | -1.673109000 | 2.500433000  | -0.950533000 |
| 1 | -1.261800000 | 2.868242000  | 0.729641000  |
| 1 | -0.129837000 | 3.317781000  | -0.580883000 |
| 6 | 3.449214000  | 0.027399000  | 0.037299000  |
| 6 | 4.684285000  | 0.043662000  | 0.062894000  |
| 1 | 5.760036000  | 0.057814000  | 0.083450000  |

E = -573.89568 au      ZPVE = 0.177773339 au       $\nu_i = 568.63i \text{ cm}^{-1}$



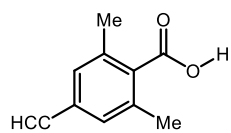

**Z-2g**

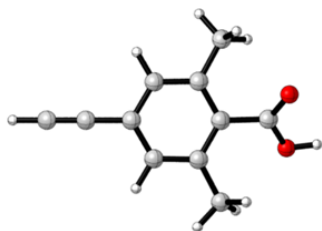

|   |              |              |              |
|---|--------------|--------------|--------------|
| 6 | 1.310802000  | 1.213801000  | 0.079887000  |
| 6 | -0.092847000 | 1.247722000  | 0.054292000  |
| 6 | -0.800761000 | 0.018458000  | -0.014997000 |
| 6 | -0.115483000 | -1.222388000 | -0.093207000 |
| 6 | 1.289700000  | -1.211680000 | -0.088031000 |
| 6 | 2.015801000  | -0.006102000 | 0.006258000  |
| 1 | 1.873872000  | 2.150577000  | 0.150445000  |
| 1 | 1.837638000  | -2.157321000 | -0.160665000 |
| 6 | -2.297780000 | 0.074837000  | -0.050145000 |
| 8 | -2.955669000 | 0.856404000  | -0.712546000 |
| 8 | -2.869776000 | -0.843302000 | 0.772064000  |
| 1 | -3.828898000 | -0.716235000 | 0.644925000  |
| 6 | -0.830668000 | -2.553484000 | -0.198861000 |
| 1 | -1.280738000 | -2.841207000 | 0.763948000  |
| 1 | -1.643751000 | -2.522127000 | -0.941514000 |
| 1 | -0.118875000 | -3.337057000 | -0.502673000 |
| 6 | -0.798866000 | 2.585341000  | 0.106891000  |
| 1 | -1.287158000 | 2.810634000  | -0.853542000 |
| 1 | -1.587772000 | 2.599889000  | 0.876287000  |
| 1 | -0.076281000 | 3.383762000  | 0.337132000  |
| 6 | 3.454842000  | -0.020328000 | 0.022123000  |
| 6 | 4.690170000  | -0.031811000 | 0.036039000  |
| 1 | 5.766058000  | -0.041933000 | 0.048020000  |

E = -573.916441 au      ZPVE = 0.179556287 au

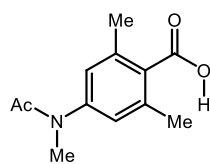

**E-2h**

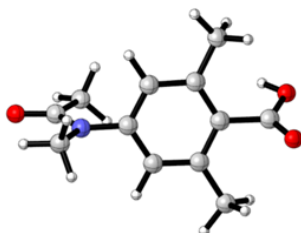

|   |              |              |              |
|---|--------------|--------------|--------------|
| 6 | 0.326515000  | -1.326410000 | 0.118912000  |
| 6 | -1.073721000 | -1.264913000 | 0.220028000  |
| 6 | -1.713717000 | -0.029837000 | -0.052171000 |
| 6 | -0.979383000 | 1.111104000  | -0.460349000 |
| 6 | 0.419116000  | 1.000177000  | -0.574695000 |
| 6 | 1.078073000  | -0.201437000 | -0.266717000 |
| 1 | 0.852005000  | -2.260627000 | 0.348220000  |
| 1 | 1.010938000  | 1.856997000  | -0.917364000 |
| 6 | -3.216094000 | 0.038158000  | 0.047573000  |
| 8 | -3.977295000 | -0.663758000 | -0.579597000 |

|   |              |              |              |
|---|--------------|--------------|--------------|
| 8 | -3.689777000 | 0.969026000  | 0.924458000  |
| 1 | -2.919841000 | 1.350739000  | 1.374418000  |
| 6 | -1.659064000 | 2.423328000  | -0.800225000 |
| 1 | -2.612948000 | 2.263990000  | -1.327851000 |
| 1 | -1.874974000 | 3.026114000  | 0.099510000  |
| 1 | -1.006960000 | 3.028679000  | -1.449202000 |
| 6 | -1.870463000 | -2.491423000 | 0.604618000  |
| 1 | -2.544436000 | -2.284782000 | 1.452934000  |
| 1 | -2.503599000 | -2.820655000 | -0.234211000 |
| 1 | -1.197576000 | -3.314349000 | 0.891036000  |
| 7 | 2.494956000  | -0.303223000 | -0.399771000 |
| 6 | 3.007366000  | -0.940242000 | -1.610159000 |
| 1 | 4.103392000  | -0.953094000 | -1.537520000 |
| 1 | 2.625323000  | -1.971473000 | -1.694750000 |
| 1 | 2.703036000  | -0.375607000 | -2.508903000 |
| 6 | 3.381082000  | 0.267362000  | 0.505190000  |
| 8 | 4.596479000  | 0.244549000  | 0.332628000  |
| 6 | 2.746062000  | 0.906535000  | 1.731197000  |
| 1 | 2.285684000  | 1.873476000  | 1.470171000  |
| 1 | 1.960719000  | 0.269853000  | 2.167443000  |
| 1 | 3.544640000  | 1.080359000  | 2.465352000  |

E = -744.603988 au    ZPVE = 0.253497594 au

TS-2h

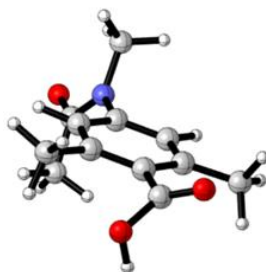

|   |              |              |              |
|---|--------------|--------------|--------------|
| 6 | -0.421481000 | 0.998848000  | -0.561015000 |
| 6 | 0.975592000  | 1.117005000  | -0.447009000 |
| 6 | 1.719002000  | -0.030702000 | -0.062034000 |
| 6 | 1.074763000  | -1.272481000 | 0.191941000  |
| 6 | -0.326911000 | -1.331540000 | 0.100521000  |
| 6 | -1.081588000 | -0.204755000 | -0.265195000 |
| 1 | -1.014864000 | 1.859902000  | -0.889665000 |
| 1 | -0.849443000 | -2.268552000 | 0.324689000  |
| 6 | 3.214450000  | 0.028217000  | 0.056251000  |
| 8 | 3.962614000  | -0.837814000 | -0.337832000 |
| 8 | 3.699944000  | 1.194091000  | 0.642781000  |
| 1 | 3.738183000  | 1.027541000  | 1.597361000  |
| 6 | 1.838793000  | -2.526291000 | 0.560439000  |
| 1 | 2.410277000  | -2.905694000 | -0.300660000 |
| 1 | 2.568074000  | -2.344931000 | 1.366666000  |
| 1 | 1.139656000  | -3.307676000 | 0.897164000  |
| 6 | 1.619749000  | 2.447126000  | -0.780263000 |
| 1 | 1.921061000  | 2.985683000  | 0.131431000  |

|   |              |              |              |
|---|--------------|--------------|--------------|
| 1 | 2.526761000  | 2.323470000  | -1.392085000 |
| 1 | 0.908137000  | 3.074261000  | -1.340527000 |
| 7 | -2.499314000 | -0.304507000 | -0.389779000 |
| 6 | -3.019984000 | -0.946681000 | -1.593729000 |
| 1 | -4.115666000 | -0.955669000 | -1.515337000 |
| 1 | -2.718653000 | -0.387925000 | -2.497177000 |
| 1 | -2.641666000 | -1.979585000 | -1.674769000 |
| 6 | -3.379449000 | 0.275806000  | 0.514648000  |
| 8 | -4.595801000 | 0.256962000  | 0.346732000  |
| 6 | -2.737782000 | 0.918824000  | 1.735040000  |
| 1 | -1.945019000 | 0.287356000  | 2.165215000  |
| 1 | -2.285028000 | 1.888180000  | 1.469862000  |
| 1 | -3.531596000 | 1.089021000  | 2.475269000  |

E = -744.590725 au      ZPVE = 0.252251139 au       $\nu_i = 568.36i \text{ cm}^{-1}$

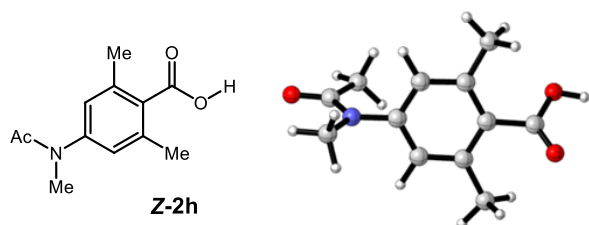

|   |              |              |              |
|---|--------------|--------------|--------------|
| 6 | 0.332660000  | -1.323982000 | 0.089476000  |
| 6 | -1.068033000 | -1.264999000 | 0.192545000  |
| 6 | -1.710848000 | -0.022671000 | -0.051348000 |
| 6 | -0.972846000 | 1.129282000  | -0.427228000 |
| 6 | 0.424393000  | 1.014526000  | -0.546074000 |
| 6 | 1.084966000  | -0.193247000 | -0.269683000 |
| 1 | 0.856672000  | -2.262982000 | 0.301522000  |
| 1 | 1.016885000  | 1.880809000  | -0.862273000 |
| 6 | -3.205235000 | 0.024256000  | 0.057624000  |
| 8 | -3.967627000 | -0.812071000 | -0.390483000 |
| 8 | -3.638010000 | 1.112137000  | 0.746379000  |
| 1 | -4.610890000 | 1.037111000  | 0.731320000  |
| 6 | -1.623870000 | 2.462954000  | -0.730044000 |
| 1 | -2.511243000 | 2.348020000  | -1.372703000 |
| 1 | -1.954486000 | 2.963484000  | 0.193473000  |
| 1 | -0.907922000 | 3.119808000  | -1.248798000 |
| 6 | -1.836922000 | -2.514350000 | 0.564459000  |
| 1 | -2.547211000 | -2.327356000 | 1.386117000  |
| 1 | -2.427863000 | -2.881167000 | -0.288849000 |
| 1 | -1.140009000 | -3.305172000 | 0.883246000  |
| 7 | 2.502283000  | -0.291353000 | -0.403824000 |
| 6 | 3.016116000  | -0.899546000 | -1.627843000 |
| 1 | 4.112160000  | -0.912876000 | -1.554858000 |
| 1 | 2.635226000  | -1.929020000 | -1.736733000 |
| 1 | 2.711677000  | -0.314726000 | -2.513651000 |
| 6 | 3.387197000  | 0.257576000  | 0.515255000  |
| 8 | 4.603171000  | 0.238004000  | 0.343651000  |
| 6 | 2.750584000  | 0.868490000  | 1.754428000  |

|   |             |             |             |
|---|-------------|-------------|-------------|
| 1 | 2.290641000 | 1.841196000 | 1.515224000 |
| 1 | 1.963184000 | 0.223369000 | 2.174073000 |
| 1 | 3.547948000 | 1.024675000 | 2.493883000 |

E = -744.611648 au    ZPVE = 0.25401702 au

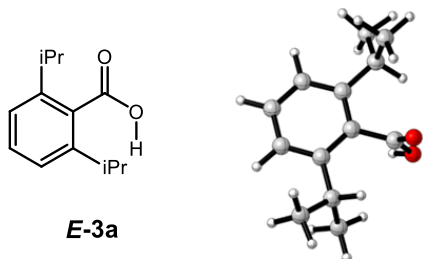

|   |              |              |              |
|---|--------------|--------------|--------------|
| 6 | 1.216369000  | 1.946674000  | -0.005737000 |
| 6 | 1.237424000  | 0.539814000  | -0.084664000 |
| 6 | -0.000134000 | -0.145240000 | -0.004106000 |
| 6 | -1.236409000 | 0.538068000  | 0.112602000  |
| 6 | -1.211641000 | 1.945587000  | 0.168993000  |
| 6 | 0.004858000  | 2.643651000  | 0.121599000  |
| 1 | 2.154153000  | 2.508321000  | -0.054419000 |
| 1 | -2.148595000 | 2.504812000  | 0.250386000  |
| 6 | -0.014379000 | -1.652180000 | -0.064352000 |
| 8 | 0.023889000  | -2.313429000 | -1.078055000 |
| 8 | -0.076646000 | -2.259348000 | 1.159881000  |
| 1 | -0.109819000 | -1.546099000 | 1.818334000  |
| 1 | 0.008395000  | 3.737732000  | 0.175055000  |
| 6 | -2.545256000 | -0.238120000 | 0.061399000  |
| 1 | -2.367642000 | -1.232970000 | 0.510199000  |
| 6 | 2.545246000  | -0.231894000 | -0.196176000 |
| 1 | 2.327080000  | -1.174446000 | -0.729201000 |
| 6 | 3.613070000  | 0.512148000  | -1.008099000 |
| 1 | 4.479918000  | -0.148024000 | -1.179732000 |
| 1 | 3.222051000  | 0.832052000  | -1.987993000 |
| 1 | 3.982244000  | 1.403968000  | -0.472939000 |
| 6 | 3.076713000  | -0.584948000 | 1.204355000  |
| 1 | 3.261624000  | 0.335130000  | 1.786813000  |
| 1 | 2.355512000  | -1.209200000 | 1.756352000  |
| 1 | 4.024550000  | -1.146545000 | 1.132652000  |
| 6 | -2.951140000 | -0.453023000 | -1.407944000 |
| 1 | -3.123759000 | 0.521920000  | -1.897332000 |
| 1 | -2.158612000 | -0.984761000 | -1.958851000 |
| 1 | -3.881375000 | -1.044325000 | -1.472892000 |
| 6 | -3.679253000 | 0.423039000  | 0.853995000  |
| 1 | -4.555579000 | -0.246110000 | 0.884549000  |
| 1 | -3.375769000 | 0.643637000  | 1.891254000  |
| 1 | -4.005129000 | 1.365668000  | 0.381961000  |

E = -654.716687 au    ZPVE = 0.285929546 au

**TS-3a**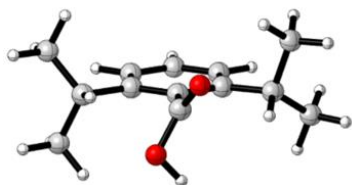

|   |              |              |              |
|---|--------------|--------------|--------------|
| 6 | -1.190936000 | 1.918381000  | 0.011925000  |
| 6 | -1.220008000 | 0.510699000  | 0.055748000  |
| 6 | 0.013750000  | -0.184619000 | -0.004865000 |
| 6 | 1.255756000  | 0.496877000  | -0.093880000 |
| 6 | 1.233930000  | 1.905407000  | -0.136820000 |
| 6 | 0.023499000  | 2.612396000  | -0.088491000 |
| 1 | -2.128901000 | 2.481332000  | 0.058880000  |
| 1 | 2.174230000  | 2.460236000  | -0.210139000 |
| 6 | 0.012579000  | -1.685783000 | 0.031076000  |
| 8 | 0.556755000  | -2.358249000 | 0.876988000  |
| 8 | -0.717281000 | -2.268748000 | -1.006811000 |
| 1 | -0.092138000 | -2.413623000 | -1.734772000 |
| 1 | 0.027794000  | 3.707233000  | -0.124173000 |
| 6 | 2.583517000  | -0.249279000 | -0.098495000 |
| 1 | 2.403028000  | -1.280051000 | -0.452307000 |
| 6 | -2.552299000 | -0.217468000 | 0.169379000  |
| 1 | -2.355168000 | -1.275458000 | 0.412106000  |
| 6 | -3.420171000 | 0.350733000  | 1.302680000  |
| 1 | -4.331964000 | -0.259389000 | 1.423097000  |
| 1 | -2.874176000 | 0.351392000  | 2.260840000  |
| 1 | -3.741053000 | 1.384790000  | 1.089469000  |
| 6 | -3.296768000 | -0.179844000 | -1.173864000 |
| 1 | -3.510991000 | 0.863001000  | -1.468454000 |
| 1 | -2.687943000 | -0.650336000 | -1.961693000 |
| 1 | -4.256939000 | -0.720632000 | -1.103532000 |
| 6 | 3.131258000  | -0.345230000 | 1.335262000  |
| 1 | 3.309052000  | 0.666583000  | 1.741220000  |
| 1 | 2.412664000  | -0.866859000 | 1.986110000  |
| 1 | 4.087466000  | -0.897571000 | 1.351768000  |
| 6 | 3.619914000  | 0.378150000  | -1.041480000 |
| 1 | 4.508508000  | -0.272623000 | -1.108086000 |
| 1 | 3.213015000  | 0.515696000  | -2.057460000 |
| 1 | 3.963592000  | 1.359733000  | -0.673338000 |

E = -654.70149 au    ZPVE = 0.284051378 au     $\nu_i = 571.43i \text{ cm}^{-1}$

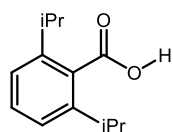**Z-3a**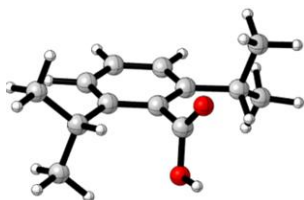

|   |              |             |             |
|---|--------------|-------------|-------------|
| 6 | -1.210128000 | 1.934710000 | 0.052789000 |
|---|--------------|-------------|-------------|

|   |              |              |              |
|---|--------------|--------------|--------------|
| 6 | -1.227970000 | 0.525710000  | 0.078868000  |
| 6 | 0.010021000  | -0.153574000 | 0.003412000  |
| 6 | 1.245197000  | 0.531653000  | -0.088498000 |
| 6 | 1.217973000  | 1.939764000  | -0.102467000 |
| 6 | 0.001235000  | 2.636554000  | -0.034669000 |
| 1 | -2.151381000 | 2.491617000  | 0.103498000  |
| 1 | 2.154422000  | 2.501811000  | -0.171353000 |
| 6 | 0.024079000  | -1.652947000 | 0.050483000  |
| 8 | 0.339133000  | -2.330739000 | 1.010382000  |
| 8 | -0.358552000 | -2.191391000 | -1.138231000 |
| 1 | -0.326017000 | -3.156891000 | -0.993285000 |
| 1 | -0.002014000 | 3.731858000  | -0.050984000 |
| 6 | 2.558428000  | -0.236219000 | -0.117109000 |
| 1 | 2.352348000  | -1.238998000 | -0.535466000 |
| 6 | -2.544152000 | -0.234934000 | 0.141024000  |
| 1 | -2.323630000 | -1.275457000 | 0.440767000  |
| 6 | -3.504157000 | 0.340503000  | 1.191797000  |
| 1 | -4.398476000 | -0.300133000 | 1.279766000  |
| 1 | -3.022024000 | 0.402271000  | 2.181519000  |
| 1 | -3.849971000 | 1.350596000  | 0.913024000  |
| 6 | -3.197856000 | -0.272001000 | -1.249820000 |
| 1 | -3.425049000 | 0.753084000  | -1.592611000 |
| 1 | -2.521593000 | -0.742030000 | -1.981721000 |
| 1 | -4.142835000 | -0.843190000 | -1.224046000 |
| 6 | 3.087386000  | -0.419887000 | 1.315539000  |
| 1 | 3.285292000  | 0.565596000  | 1.773540000  |
| 1 | 2.349801000  | -0.954143000 | 1.934839000  |
| 1 | 4.029909000  | -0.995563000 | 1.313165000  |
| 6 | 3.616371000  | 0.418036000  | -1.015289000 |
| 1 | 4.495616000  | -0.242707000 | -1.103171000 |
| 1 | 3.223344000  | 0.610344000  | -2.027522000 |
| 1 | 3.969053000  | 1.374769000  | -0.593530000 |

E = -654.722497 au      ZPVE = 0.285775139 au

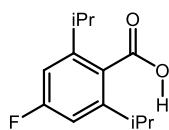

**E-3b**

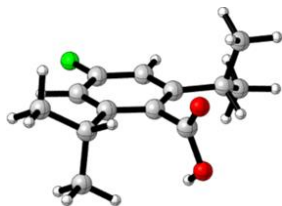

|   |              |              |              |
|---|--------------|--------------|--------------|
| 6 | 1.219535000  | 1.679565000  | -0.053273000 |
| 6 | 1.236514000  | 0.273031000  | -0.104579000 |
| 6 | 0.001850000  | -0.415307000 | -0.006188000 |
| 6 | -1.233581000 | 0.271028000  | 0.098478000  |
| 6 | -1.217793000 | 1.678250000  | 0.128122000  |
| 6 | 0.002134000  | 2.352718000  | 0.063290000  |
| 1 | 2.138935000  | 2.267151000  | -0.114850000 |
| 1 | -2.138853000 | 2.262451000  | 0.197862000  |
| 6 | -0.010433000 | -1.922745000 | -0.044142000 |
| 8 | 0.063579000  | -2.597416000 | -1.046947000 |

|   |              |              |              |
|---|--------------|--------------|--------------|
| 8 | -0.115645000 | -2.513734000 | 1.184806000  |
| 1 | -0.162465000 | -1.792784000 | 1.833993000  |
| 6 | -2.546093000 | -0.499064000 | 0.057111000  |
| 1 | -2.374524000 | -1.485168000 | 0.526102000  |
| 6 | 2.548006000  | -0.493306000 | -0.206355000 |
| 1 | 2.338334000  | -1.425572000 | -0.760016000 |
| 6 | 3.630005000  | 0.267156000  | -0.982326000 |
| 1 | 4.501945000  | -0.388080000 | -1.145515000 |
| 1 | 3.260485000  | 0.602397000  | -1.965387000 |
| 1 | 3.985130000  | 1.150427000  | -0.423773000 |
| 6 | 3.052170000  | -0.871246000 | 1.198097000  |
| 1 | 3.228063000  | 0.038580000  | 1.799105000  |
| 1 | 2.321273000  | -1.504201000 | 1.726662000  |
| 1 | 4.000539000  | -1.432426000 | 1.132888000  |
| 6 | -2.944078000 | -0.740847000 | -1.410405000 |
| 1 | -3.111924000 | 0.224585000  | -1.919750000 |
| 1 | -2.150596000 | -1.285547000 | -1.947184000 |
| 1 | -3.875440000 | -1.330853000 | -1.467903000 |
| 6 | -3.679821000 | 0.184951000  | 0.829859000  |
| 1 | -4.561199000 | -0.476980000 | 0.866187000  |
| 1 | -3.382060000 | 0.422002000  | 1.865072000  |
| 1 | -3.995547000 | 1.121067000  | 0.338230000  |
| 9 | 0.004881000  | 3.704117000  | 0.105476000  |

E = -753.750731 au      ZPVE = 0.277991745 au

TS-3b

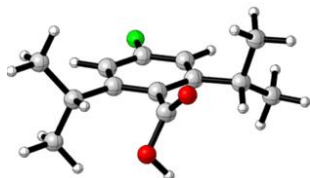

|   |              |              |              |
|---|--------------|--------------|--------------|
| 6 | -1.189005000 | 1.652212000  | 0.044145000  |
| 6 | -1.218990000 | 0.245558000  | 0.067249000  |
| 6 | 0.010047000  | -0.458586000 | -0.005485000 |
| 6 | 1.254277000  | 0.221658000  | -0.084088000 |
| 6 | 1.245131000  | 1.629139000  | -0.110046000 |
| 6 | 0.033279000  | 2.316770000  | -0.049772000 |
| 1 | -2.106528000 | 2.244246000  | 0.102678000  |
| 1 | 2.171067000  | 2.205830000  | -0.177612000 |
| 6 | 0.004405000  | -1.959298000 | 0.006521000  |
| 8 | 0.589891000  | -2.645962000 | 0.812854000  |
| 8 | -0.776872000 | -2.525833000 | -1.001956000 |
| 1 | -0.190202000 | -2.657146000 | -1.763698000 |
| 6 | 2.584925000  | -0.518766000 | -0.097443000 |
| 1 | 2.408203000  | -1.544670000 | -0.464651000 |
| 6 | -2.560715000 | -0.465569000 | 0.179307000  |
| 1 | -2.376008000 | -1.526920000 | 0.413661000  |
| 6 | -3.417749000 | 0.107663000  | 1.318175000  |
| 1 | -4.336182000 | -0.492458000 | 1.437043000  |
| 1 | -2.869825000 | 0.096334000  | 2.275111000  |
| 1 | -3.727756000 | 1.146415000  | 1.111579000  |

|   |              |              |              |
|---|--------------|--------------|--------------|
| 6 | -3.307994000 | -0.407371000 | -1.161572000 |
| 1 | -3.512449000 | 0.640182000  | -1.446221000 |
| 1 | -2.707505000 | -0.877698000 | -1.955687000 |
| 1 | -4.273448000 | -0.938466000 | -1.092130000 |
| 6 | 3.130013000  | -0.630487000 | 1.336308000  |
| 1 | 4.087798000  | -1.179938000 | 1.345854000  |
| 1 | 3.304747000  | 0.376262000  | 1.755868000  |
| 1 | 2.412862000  | -1.163860000 | 1.978957000  |
| 6 | 3.619266000  | 0.127694000  | -1.029460000 |
| 1 | 4.511460000  | -0.517250000 | -1.101776000 |
| 1 | 3.214755000  | 0.275879000  | -2.044845000 |
| 1 | 3.957072000  | 1.106152000  | -0.647539000 |
| 9 | 0.045161000  | 3.668641000  | -0.077424000 |

E = -753.735794 au    ZPVE = 0.276140159 au     $\nu_i = 568.44i \text{ cm}^{-1}$

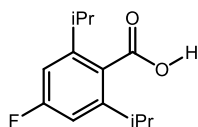

**Z-3b**

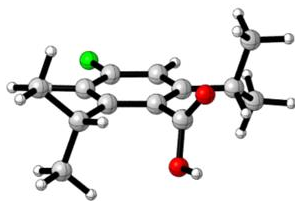

|   |              |              |              |
|---|--------------|--------------|--------------|
| 6 | 1.209115000  | 1.661065000  | -0.065069000 |
| 6 | 1.224672000  | 0.253231000  | -0.080520000 |
| 6 | -0.010144000 | -0.432649000 | -0.000450000 |
| 6 | -1.245986000 | 0.253800000  | 0.085294000  |
| 6 | -1.227741000 | 1.660693000  | 0.093615000  |
| 6 | -0.008403000 | 2.335998000  | 0.020807000  |
| 1 | 2.131732000  | 2.245150000  | -0.122170000 |
| 1 | -2.148539000 | 2.245883000  | 0.160056000  |
| 6 | -0.023763000 | -1.931508000 | -0.035578000 |
| 8 | -0.427912000 | -2.616418000 | -0.956379000 |
| 8 | 0.468395000  | -2.461802000 | 1.115678000  |
| 1 | 0.429654000  | -3.428163000 | 0.978692000  |
| 6 | -2.566259000 | -0.501480000 | 0.118573000  |
| 1 | -2.367676000 | -1.509944000 | 0.524611000  |
| 6 | 2.550552000  | -0.489802000 | -0.149941000 |
| 1 | 2.340744000  | -1.537170000 | -0.429966000 |
| 6 | 3.485377000  | 0.086303000  | -1.222897000 |
| 1 | 4.388614000  | -0.541080000 | -1.313847000 |
| 1 | 2.988863000  | 0.125533000  | -2.206625000 |
| 1 | 3.818841000  | 1.105833000  | -0.963947000 |
| 6 | 3.224845000  | -0.496019000 | 1.231347000  |
| 1 | 3.445013000  | 0.536831000  | 1.554816000  |
| 1 | 2.566497000  | -0.963753000 | 1.980566000  |
| 1 | 4.176400000  | -1.055513000 | 1.198731000  |
| 6 | -3.108124000 | -0.666523000 | -1.311434000 |
| 1 | -3.299500000 | 0.324399000  | -1.760363000 |
| 1 | -2.381792000 | -1.205396000 | -1.939572000 |
| 1 | -4.056792000 | -1.231675000 | -1.304634000 |
| 6 | -3.608631000 | 0.158486000  | 1.030694000  |
| 1 | -4.495327000 | -0.492026000 | 1.118527000  |



|   |              |             |             |
|---|--------------|-------------|-------------|
| 1 | -3.206365000 | 0.336166000 | 2.041947000 |
| 1 | -3.952853000 | 1.123418000 | 0.620625000 |
| 9 | -0.008270000 | 3.688634000 | 0.033501000 |

E = -753.756748 au    ZPVE = 0.277848478 au

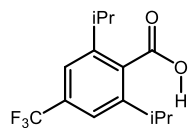

**E-3c**

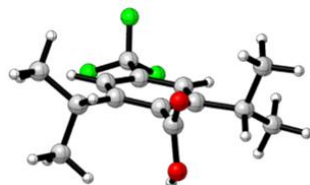

|   |              |              |              |
|---|--------------|--------------|--------------|
| 6 | 0.932104000  | 1.212720000  | 0.061350000  |
| 6 | -0.473848000 | 1.238358000  | 0.106781000  |
| 6 | -1.164221000 | 0.004677000  | 0.008060000  |
| 6 | -0.484132000 | -1.234970000 | -0.091624000 |
| 6 | 0.922329000  | -1.220783000 | -0.116340000 |
| 6 | 1.620122000  | -0.005398000 | -0.049591000 |
| 1 | 1.502344000  | 2.143323000  | 0.115924000  |
| 1 | 1.483186000  | -2.155350000 | -0.193984000 |
| 6 | -2.672949000 | -0.001761000 | 0.036432000  |
| 8 | -3.348953000 | 0.046390000  | 1.039509000  |
| 8 | -3.257303000 | -0.069121000 | -1.196859000 |
| 1 | -2.536047000 | -0.108162000 | -1.846294000 |
| 6 | -1.263673000 | -2.541654000 | -0.064642000 |
| 1 | -2.245060000 | -2.360617000 | -0.540308000 |
| 6 | -1.236863000 | 2.551939000  | 0.198447000  |
| 1 | -2.186367000 | 2.343361000  | 0.722632000  |
| 6 | -0.492073000 | 3.620700000  | 1.008104000  |
| 1 | -1.146879000 | 4.494481000  | 1.162620000  |
| 1 | -0.187410000 | 3.237728000  | 1.995952000  |
| 1 | 0.408819000  | 3.976734000  | 0.479401000  |
| 6 | -1.568878000 | 3.070927000  | -1.212101000 |
| 1 | -0.640588000 | 3.244786000  | -1.784664000 |
| 1 | -2.192080000 | 2.349811000  | -1.765229000 |
| 1 | -2.124334000 | 4.023012000  | -1.154744000 |
| 6 | -1.518035000 | -2.945407000 | 1.399306000  |
| 1 | -0.557119000 | -3.122604000 | 1.913898000  |
| 1 | -2.061386000 | -2.151670000 | 1.936960000  |
| 1 | -2.114300000 | -3.873166000 | 1.447107000  |
| 6 | -0.580310000 | -3.675056000 | -0.838725000 |
| 1 | -1.248515000 | -4.551042000 | -0.886379000 |
| 1 | -0.332140000 | -3.372614000 | -1.869959000 |
| 1 | 0.349044000  | -4.000738000 | -0.341093000 |
| 6 | 3.124064000  | -0.010367000 | -0.033353000 |
| 9 | 3.635114000  | 1.107913000  | -0.589504000 |
| 9 | 3.603134000  | -0.077881000 | 1.227056000  |
| 9 | 3.630314000  | -1.065473000 | -0.704848000 |

E = -991.03079 au    ZPVE = 0.290931219 au

TS-3c

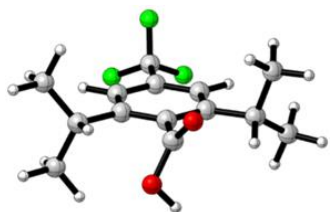

|   |              |              |              |
|---|--------------|--------------|--------------|
| 6 | -0.877226000 | -1.222491000 | 0.044777000  |
| 6 | 0.529102000  | -1.215402000 | 0.070769000  |
| 6 | 1.194554000  | 0.034064000  | -0.000451000 |
| 6 | 0.482914000  | 1.259127000  | -0.084735000 |
| 6 | -0.922992000 | 1.207905000  | -0.111249000 |
| 6 | -1.595058000 | -0.021540000 | -0.048552000 |
| 1 | -1.422774000 | -2.168953000 | 0.092005000  |
| 1 | -1.505478000 | 2.129199000  | -0.189299000 |
| 6 | 2.696898000  | 0.067363000  | 0.018719000  |
| 8 | 3.361812000  | 0.611050000  | 0.870244000  |
| 8 | 3.281907000  | -0.632474000 | -1.035221000 |
| 1 | 3.400429000  | 0.001803000  | -1.760296000 |
| 6 | 1.196532000  | 2.603555000  | -0.103839000 |
| 1 | 2.224512000  | 2.445715000  | -0.476354000 |
| 6 | 1.287283000  | -2.531292000 | 0.166431000  |
| 1 | 2.342359000  | -2.311138000 | 0.402010000  |
| 6 | 0.745713000  | -3.421095000 | 1.295579000  |
| 1 | 1.376684000  | -4.320006000 | 1.402061000  |
| 1 | 0.740207000  | -2.885102000 | 2.259273000  |
| 1 | -0.282249000 | -3.762958000 | 1.085810000  |
| 6 | 1.252178000  | -3.261670000 | -1.184814000 |
| 1 | 0.211510000  | -3.497208000 | -1.470399000 |
| 1 | 1.700849000  | -2.635175000 | -1.971438000 |
| 1 | 1.815392000  | -4.209468000 | -1.128482000 |
| 6 | 1.303579000  | 3.151022000  | 1.329590000  |
| 1 | 0.294897000  | 3.306732000  | 1.751784000  |
| 1 | 1.851711000  | 2.444510000  | 1.971803000  |
| 1 | 1.834685000  | 4.118957000  | 1.336615000  |
| 6 | 0.525294000  | 3.623173000  | -1.034431000 |
| 1 | 1.151897000  | 4.527853000  | -1.110977000 |
| 1 | 0.380069000  | 3.214311000  | -2.048467000 |
| 1 | -0.457717000 | 3.941258000  | -0.647733000 |
| 6 | -3.098104000 | -0.047876000 | -0.021968000 |
| 9 | -3.590575000 | -1.182786000 | -0.560827000 |
| 9 | -3.570354000 | 0.025393000  | 1.241221000  |
| 9 | -3.631375000 | 0.988727000  | -0.701846000 |

E = -991.015935 au    ZPVE = 0.289031108 au     $\nu_i = 571.47i \text{ cm}^{-1}$

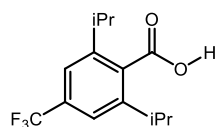

**Z-3c**

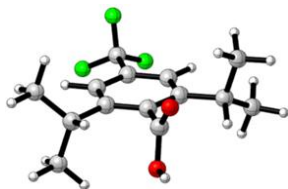

|   |              |              |              |
|---|--------------|--------------|--------------|
| 6 | 0.920412000  | 1.213140000  | 0.052706000  |
| 6 | -0.486347000 | 1.229793000  | 0.083415000  |
| 6 | -1.168032000 | -0.006719000 | 0.008383000  |
| 6 | -0.484771000 | -1.242276000 | -0.090420000 |
| 6 | 0.921144000  | -1.220807000 | -0.110372000 |
| 6 | 1.614389000  | -0.002296000 | -0.039149000 |
| 1 | 1.484127000  | 2.148854000  | 0.095403000  |
| 1 | 1.486495000  | -2.152397000 | -0.193105000 |
| 6 | -2.668252000 | -0.018168000 | 0.062156000  |
| 8 | -3.337493000 | -0.290285000 | 1.040312000  |
| 8 | -3.208378000 | 0.312477000  | -1.139517000 |
| 1 | -4.174306000 | 0.284427000  | -0.995324000 |
| 6 | -1.254386000 | -2.553398000 | -0.122147000 |
| 1 | -2.251826000 | -2.344590000 | -0.551761000 |
| 6 | -1.243970000 | 2.547002000  | 0.138419000  |
| 1 | -2.277573000 | 2.330536000  | 0.464135000  |
| 6 | -0.644704000 | 3.525448000  | 1.158005000  |
| 1 | -1.284375000 | 4.420333000  | 1.243266000  |
| 1 | -0.559937000 | 3.062608000  | 2.155123000  |
| 1 | 0.357867000  | 3.867265000  | 0.848987000  |
| 6 | -1.306863000 | 3.172238000  | -1.264947000 |
| 1 | -0.288331000 | 3.392999000  | -1.630452000 |
| 1 | -1.790545000 | 2.482828000  | -1.975327000 |
| 1 | -1.877581000 | 4.117308000  | -1.245434000 |
| 6 | -1.450987000 | -3.072887000 | 1.312652000  |
| 1 | -0.469977000 | -3.274315000 | 1.778344000  |
| 1 | -1.985823000 | -2.330565000 | 1.925835000  |
| 1 | -2.031390000 | -4.012141000 | 1.309289000  |
| 6 | -0.591694000 | -3.615784000 | -1.008271000 |
| 1 | -1.252285000 | -4.494734000 | -1.096694000 |
| 1 | -0.389965000 | -3.229310000 | -2.021102000 |
| 1 | 0.360547000  | -3.966531000 | -0.575041000 |
| 6 | 3.117546000  | -0.005046000 | -0.008213000 |
| 9 | 3.634410000  | 1.128314000  | -0.527541000 |
| 9 | 3.584785000  | -0.107529000 | 1.255091000  |
| 9 | 3.633131000  | -1.040956000 | -0.702637000 |

E = -991.037109 au      ZPVE = 0.29080102 au

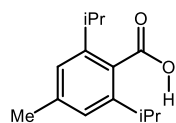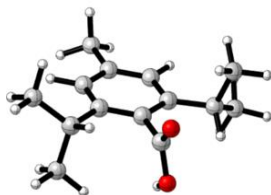

**E-3d**

|   |              |              |              |
|---|--------------|--------------|--------------|
| 6 | 1.211156000  | 1.649191000  | -0.046487000 |
| 6 | 1.234039000  | 0.242552000  | -0.103401000 |
| 6 | -0.000962000 | -0.444162000 | -0.011906000 |
| 6 | -1.232173000 | 0.247501000  | 0.096518000  |
| 6 | -1.201460000 | 1.654778000  | 0.128412000  |
| 6 | 0.008373000  | 2.370387000  | 0.070781000  |
| 1 | 2.153189000  | 2.205766000  | -0.100732000 |
| 1 | -2.140349000 | 2.213900000  | 0.205067000  |
| 6 | -0.016846000 | -1.951153000 | -0.043811000 |
| 8 | 0.035181000  | -2.632297000 | -1.043766000 |
| 8 | -0.097725000 | -2.535234000 | 1.190995000  |
| 1 | -0.136461000 | -1.808729000 | 1.834509000  |
| 6 | -2.545954000 | -0.521694000 | 0.060364000  |
| 1 | -2.374398000 | -1.508657000 | 0.528466000  |
| 6 | 2.544043000  | -0.527979000 | -0.198922000 |
| 1 | 2.330254000  | -1.474977000 | -0.725886000 |
| 6 | 3.618383000  | 0.209430000  | -1.008149000 |
| 1 | 4.486397000  | -0.452205000 | -1.168069000 |
| 1 | 3.235044000  | 0.522189000  | -1.993391000 |
| 1 | 3.983825000  | 1.105213000  | -0.476923000 |
| 6 | 3.065010000  | -0.869851000 | 1.208367000  |
| 1 | 3.245188000  | 0.055235000  | 1.784462000  |
| 1 | 2.339533000  | -1.489405000 | 1.760075000  |
| 1 | 4.013526000  | -1.431868000 | 1.148807000  |
| 6 | -2.952401000 | -0.763625000 | -1.404646000 |
| 1 | -3.119669000 | 0.202425000  | -1.913258000 |
| 1 | -2.162118000 | -1.309857000 | -1.944623000 |
| 1 | -3.885540000 | -1.351565000 | -1.458944000 |
| 6 | -3.677268000 | 0.160594000  | 0.838747000  |
| 1 | -4.556679000 | -0.503794000 | 0.882875000  |
| 1 | -3.372865000 | 0.401374000  | 1.871253000  |
| 1 | -3.998879000 | 1.094786000  | 0.347282000  |
| 6 | 0.014547000  | 3.882565000  | 0.081255000  |
| 1 | 0.924306000  | 4.273986000  | 0.565280000  |
| 1 | -0.014746000 | 4.283985000  | -0.947277000 |
| 1 | -0.860124000 | 4.281243000  | 0.620472000  |

E = -693.902201 au      ZPVE = 0.313454996 au

TS-3d

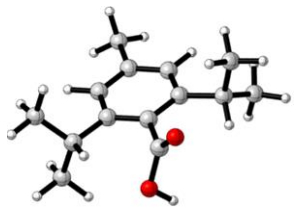

|   |              |              |              |
|---|--------------|--------------|--------------|
| 6 | -1.177743000 | 1.627781000  | 0.035998000  |
| 6 | -1.217657000 | 0.221226000  | 0.065883000  |
| 6 | 0.009470000  | -0.484421000 | -0.000111000 |
| 6 | 1.251013000  | 0.197608000  | -0.083074000 |
| 6 | 1.231389000  | 1.605489000  | -0.112075000 |
| 6 | 0.032166000  | 2.337590000  | -0.058671000 |
| 1 | -2.116427000 | 2.191981000  | 0.085281000  |
| 1 | 2.176915000  | 2.153973000  | -0.184812000 |
| 6 | 0.003830000  | -1.984761000 | 0.015914000  |
| 8 | 0.571203000  | -2.670520000 | 0.835903000  |
| 8 | -0.756094000 | -2.553865000 | -1.008750000 |
| 1 | -0.150843000 | -2.689613000 | -1.754969000 |
| 6 | 2.580198000  | -0.546379000 | -0.099107000 |
| 1 | 2.400579000  | -1.573873000 | -0.461977000 |
| 6 | -2.558453000 | -0.493073000 | 0.172869000  |
| 1 | -2.373186000 | -1.555240000 | 0.405322000  |
| 6 | -3.420376000 | 0.073638000  | 1.311568000  |
| 1 | -4.337997000 | -0.528722000 | 1.427416000  |
| 1 | -2.873738000 | 0.060748000  | 2.269310000  |
| 1 | -3.731662000 | 1.112587000  | 1.107801000  |
| 6 | -3.303400000 | -0.434845000 | -1.169281000 |
| 1 | -3.506525000 | 0.613024000  | -1.453994000 |
| 1 | -2.700022000 | -0.904288000 | -1.961905000 |
| 1 | -4.269386000 | -0.965960000 | -1.103795000 |
| 6 | 3.132301000  | -0.655628000 | 1.332043000  |
| 1 | 3.309726000  | 0.352403000  | 1.747659000  |
| 1 | 2.416135000  | -1.184986000 | 1.979321000  |
| 1 | 4.089373000  | -1.206811000 | 1.340750000  |
| 6 | 3.613726000  | 0.091290000  | -1.038499000 |
| 1 | 4.501577000  | -0.559391000 | -1.115881000 |
| 1 | 3.203157000  | 0.240887000  | -2.051328000 |
| 1 | 3.959908000  | 1.068332000  | -0.660519000 |
| 6 | 0.045828000  | 3.849488000  | -0.054266000 |
| 1 | -0.863760000 | 4.257364000  | -0.524863000 |
| 1 | 0.091513000  | 4.240615000  | 0.977706000  |
| 1 | 0.920027000  | 4.242021000  | -0.598889000 |

E = -693.887042 au    ZPVE = 0.311595108 au     $\nu_i = 569.83i \text{ cm}^{-1}$

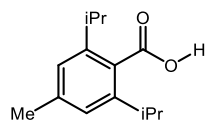

Z-3d

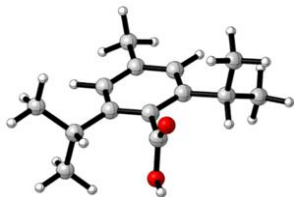

|   |             |             |              |
|---|-------------|-------------|--------------|
| 6 | 1.200180000 | 1.636443000 | -0.055649000 |
|---|-------------|-------------|--------------|

|   |              |              |              |
|---|--------------|--------------|--------------|
| 6 | 1.223478000  | 0.228361000  | -0.079347000 |
| 6 | -0.010358000 | -0.457279000 | -0.005147000 |
| 6 | -1.242770000 | 0.232644000  | 0.085322000  |
| 6 | -1.212152000 | 1.639463000  | 0.097722000  |
| 6 | -0.003559000 | 2.357697000  | 0.031128000  |
| 1 | 2.144369000  | 2.191253000  | -0.103572000 |
| 1 | -2.151865000 | 2.198170000  | 0.170285000  |
| 6 | -0.024905000 | -1.955809000 | -0.043945000 |
| 8 | -0.396073000 | -2.639286000 | -0.979767000 |
| 8 | 0.426245000  | -2.489868000 | 1.122916000  |
| 1 | 0.388803000  | -3.455676000 | 0.981716000  |
| 6 | -2.561597000 | -0.526080000 | 0.119885000  |
| 1 | -2.361167000 | -1.533027000 | 0.530202000  |
| 6 | 2.546906000  | -0.520198000 | -0.143321000 |
| 1 | 2.334998000  | -1.567216000 | -0.424998000 |
| 6 | 3.489960000  | 0.050033000  | -1.212458000 |
| 1 | 4.390660000  | -0.581791000 | -1.300367000 |
| 1 | 2.996873000  | 0.091650000  | -2.197882000 |
| 1 | 3.827097000  | 1.068164000  | -0.952755000 |
| 6 | 3.215782000  | -0.531112000 | 1.240541000  |
| 1 | 3.436445000  | 0.500834000  | 1.566798000  |
| 1 | 2.551794000  | -0.997641000 | 1.985750000  |
| 1 | 4.166224000  | -1.093225000 | 1.212933000  |
| 6 | -3.102933000 | -0.698464000 | -1.309428000 |
| 1 | -3.295707000 | 0.290811000  | -1.761619000 |
| 1 | -2.374192000 | -1.236666000 | -1.935592000 |
| 1 | -4.050370000 | -1.266134000 | -1.302904000 |
| 6 | -3.608426000 | 0.131043000  | 1.029246000  |
| 1 | -4.490886000 | -0.524870000 | 1.121781000  |
| 1 | -3.205938000 | 0.317152000  | 2.038959000  |
| 1 | -3.959257000 | 1.091565000  | 0.614463000  |
| 6 | -0.004834000 | 3.869756000  | 0.012387000  |
| 1 | 0.938947000  | 4.274166000  | 0.413189000  |
| 1 | -0.121917000 | 4.251864000  | -1.017329000 |
| 1 | -0.834914000 | 4.274875000  | 0.614139000  |

E = -693.907943 au      ZPVE = 0.31330145 au

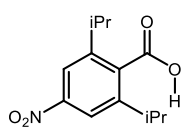

**E-3e**

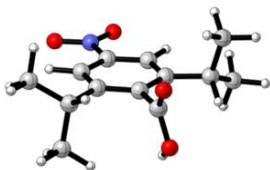

|   |              |              |              |
|---|--------------|--------------|--------------|
| 6 | -1.215075000 | 1.210871000  | -0.079899000 |
| 6 | 0.191231000  | 1.240631000  | -0.110032000 |
| 6 | 0.890550000  | 0.011236000  | -0.003937000 |
| 6 | 0.218252000  | -1.234810000 | 0.082369000  |
| 6 | -1.188483000 | -1.238142000 | 0.091645000  |
| 6 | -1.871473000 | -0.019972000 | 0.022022000  |
| 1 | -1.812176000 | 2.121703000  | -0.146922000 |
| 1 | -1.763494000 | -2.163640000 | 0.151655000  |

|   |              |              |              |
|---|--------------|--------------|--------------|
| 6 | 2.399510000  | 0.015270000  | -0.024873000 |
| 8 | 3.077715000  | 0.083456000  | -1.025449000 |
| 8 | 2.980489000  | -0.067786000 | 1.208482000  |
| 1 | 2.258704000  | -0.118108000 | 1.856605000  |
| 6 | 1.005354000  | -2.536505000 | 0.052765000  |
| 1 | 1.983153000  | -2.352177000 | 0.534103000  |
| 6 | 0.944777000  | 2.559716000  | -0.196819000 |
| 1 | 1.891641000  | 2.360765000  | -0.729217000 |
| 6 | 0.185636000  | 3.630283000  | -0.989896000 |
| 1 | 0.832184000  | 4.511203000  | -1.137833000 |
| 1 | -0.121128000 | 3.256344000  | -1.980509000 |
| 1 | -0.715465000 | 3.971284000  | -0.451951000 |
| 6 | 1.282559000  | 3.066186000  | 1.217135000  |
| 1 | 0.356678000  | 3.230276000  | 1.796329000  |
| 1 | 1.913186000  | 2.343859000  | 1.760085000  |
| 1 | 1.832447000  | 4.021637000  | 1.164597000  |
| 6 | 1.268042000  | -2.928301000 | -1.413112000 |
| 1 | 0.310390000  | -3.108456000 | -1.932628000 |
| 1 | 1.809196000  | -2.128084000 | -1.943384000 |
| 1 | 1.870009000  | -3.852066000 | -1.463710000 |
| 6 | 0.322065000  | -3.676888000 | 0.816247000  |
| 1 | 0.992221000  | -4.551556000 | 0.858981000  |
| 1 | 0.070695000  | -3.382815000 | 1.849077000  |
| 1 | -0.605476000 | -3.999744000 | 0.313678000  |
| 7 | -3.352458000 | -0.034500000 | 0.047301000  |
| 8 | -3.906314000 | -1.132406000 | 0.143597000  |
| 8 | -3.931043000 | 1.052190000  | -0.028099000 |

E = -858.745566 au      ZPVE = 0.288666406 au

TS-3e

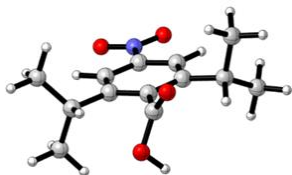

|   |              |              |              |
|---|--------------|--------------|--------------|
| 6 | -0.967456000 | -1.379046000 | 0.066605000  |
| 6 | 0.423965000  | -1.172564000 | 0.075204000  |
| 6 | 0.911427000  | 0.157392000  | -0.004018000 |
| 6 | 0.036768000  | 1.274350000  | -0.075111000 |
| 6 | -1.350195000 | 1.037399000  | -0.084267000 |
| 6 | -1.822219000 | -0.276624000 | -0.017811000 |
| 1 | -1.399994000 | -2.379733000 | 0.126575000  |
| 1 | -2.072454000 | 1.853226000  | -0.143975000 |
| 6 | 2.395162000  | 0.396076000  | -0.001130000 |
| 8 | 2.986654000  | 1.032630000  | 0.840371000  |
| 8 | 3.060067000  | -0.226130000 | -1.055428000 |
| 1 | 3.081775000  | 0.410052000  | -1.788244000 |
| 6 | 0.556252000  | 2.704684000  | -0.094098000 |
| 1 | 1.592650000  | 2.692575000  | -0.475692000 |
| 6 | 1.354714000  | -2.372771000 | 0.165916000  |

|   |              |              |              |
|---|--------------|--------------|--------------|
| 1 | 2.372501000  | -2.010886000 | 0.389156000  |
| 6 | 0.947895000  | -3.323122000 | 1.302129000  |
| 1 | 1.694653000  | -4.129043000 | 1.402845000  |
| 1 | 0.881308000  | -2.790127000 | 2.265198000  |
| 1 | -0.027365000 | -3.799237000 | 1.103307000  |
| 6 | 1.402244000  | -3.104830000 | -1.184084000 |
| 1 | 0.399714000  | -3.480343000 | -1.455722000 |
| 1 | 1.752727000  | -2.426260000 | -1.977362000 |
| 1 | 2.089438000  | -3.967112000 | -1.132556000 |
| 6 | 0.597688000  | 3.254148000  | 1.342055000  |
| 1 | -0.419423000 | 3.266691000  | 1.772313000  |
| 1 | 1.244462000  | 2.628244000  | 1.976050000  |
| 1 | 0.989141000  | 4.286341000  | 1.349813000  |
| 6 | -0.261462000 | 3.622504000  | -1.013125000 |
| 1 | 0.228356000  | 4.608099000  | -1.086977000 |
| 1 | -0.353233000 | 3.203429000  | -2.029213000 |
| 1 | -1.277211000 | 3.792533000  | -0.618008000 |
| 7 | -3.284480000 | -0.508460000 | -0.031882000 |
| 8 | -4.015057000 | 0.482867000  | -0.105002000 |
| 8 | -3.673461000 | -1.677468000 | 0.029570000  |

E = -858.730878 au    ZPVE = 0.286768908 au     $\nu_i = 570.42i \text{ cm}^{-1}$

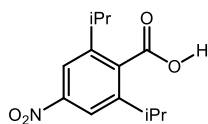

**Z-3e**

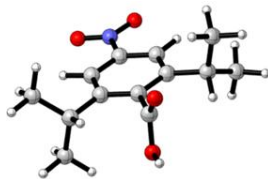

|   |              |              |              |
|---|--------------|--------------|--------------|
| 6 | -1.204834000 | 1.205076000  | -0.076525000 |
| 6 | 0.202121000  | 1.231135000  | -0.087894000 |
| 6 | 0.897431000  | 0.001427000  | -0.005100000 |
| 6 | 0.226414000  | -1.243066000 | 0.079494000  |
| 6 | -1.179994000 | -1.244229000 | 0.080462000  |
| 6 | -1.862693000 | -0.025688000 | 0.004788000  |
| 1 | -1.798818000 | 2.119275000  | -0.132483000 |
| 1 | -1.756072000 | -2.168868000 | 0.144156000  |
| 6 | 2.398255000  | 0.006547000  | -0.042325000 |
| 8 | 3.080170000  | -0.279038000 | -1.007888000 |
| 8 | 2.920885000  | 0.369033000  | 1.157337000  |
| 1 | 3.888753000  | 0.350725000  | 1.025138000  |
| 6 | 1.006642000  | -2.547476000 | 0.112924000  |
| 1 | 2.000396000  | -2.331529000 | 0.546962000  |
| 6 | 0.942881000  | 2.557877000  | -0.137726000 |
| 1 | 1.984279000  | 2.354319000  | -0.445720000 |
| 6 | 0.343518000  | 3.522126000  | -1.170536000 |
| 1 | 0.969424000  | 4.427297000  | -1.248027000 |
| 1 | 0.283609000  | 3.054969000  | -2.167436000 |
| 1 | -0.669814000 | 3.846821000  | -0.879050000 |
| 6 | 0.973238000  | 3.188608000  | 1.264268000  |
| 1 | -0.054226000 | 3.397593000  | 1.611012000  |



|   |              |              |              |
|---|--------------|--------------|--------------|
| 1 | 1.454355000  | 2.508944000  | 1.985649000  |
| 1 | 1.531617000  | 4.140951000  | 1.249684000  |
| 6 | 1.212676000  | -3.060849000 | -1.322785000 |
| 1 | 0.235162000  | -3.268492000 | -1.792945000 |
| 1 | 1.745584000  | -2.313269000 | -1.931151000 |
| 1 | 1.799628000  | -3.995860000 | -1.318587000 |
| 6 | 0.345374000  | -3.615310000 | 0.993377000  |
| 1 | 1.009391000  | -4.491750000 | 1.080256000  |
| 1 | 0.139832000  | -3.233331000 | 2.007124000  |
| 1 | -0.604571000 | -3.967212000 | 0.556379000  |
| 7 | -3.343501000 | -0.039995000 | 0.013280000  |
| 8 | -3.899566000 | -1.138719000 | 0.085161000  |
| 8 | -3.921515000 | 1.047763000  | -0.051918000 |

E = -858.752038 au      ZPVE = 0.288543219 au

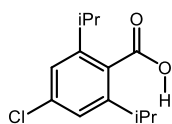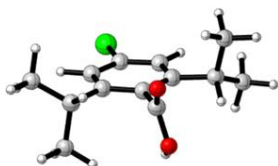

**E-3f**

|   |              |              |              |
|---|--------------|--------------|--------------|
| 6 | 1.226155000  | 1.387597000  | -0.077265000 |
| 6 | 1.235444000  | -0.019657000 | -0.113357000 |
| 6 | -0.002056000 | -0.701283000 | -0.006561000 |
| 6 | -1.233776000 | -0.007307000 | 0.089586000  |
| 6 | -1.211686000 | 1.400126000  | 0.104914000  |
| 6 | 0.011965000  | 2.079329000  | 0.033788000  |
| 1 | 2.157080000  | 1.955745000  | -0.145817000 |
| 1 | -2.138482000 | 1.975597000  | 0.169632000  |
| 6 | -0.021836000 | -2.209262000 | -0.026782000 |
| 8 | 0.047269000  | -2.894445000 | -1.022666000 |
| 8 | -0.128184000 | -2.785497000 | 1.208583000  |
| 1 | -0.171138000 | -2.057936000 | 1.850723000  |
| 6 | -2.550189000 | -0.771755000 | 0.056459000  |
| 1 | -2.383200000 | -1.752516000 | 0.538311000  |
| 6 | 2.543337000  | -0.793702000 | -0.208001000 |
| 1 | 2.328061000  | -1.730070000 | -0.752640000 |
| 6 | 3.629709000  | -0.047243000 | -0.991642000 |
| 1 | 4.495550000  | -0.711201000 | -1.151955000 |
| 1 | 3.260947000  | 0.283974000  | -1.976350000 |
| 1 | 3.993829000  | 0.836808000  | -0.440292000 |
| 6 | 3.045086000  | -1.160222000 | 1.200343000  |
| 1 | 3.225618000  | -0.245233000 | 1.792018000  |
| 1 | 2.311077000  | -1.784112000 | 1.735319000  |
| 1 | 3.990531000  | -1.726888000 | 1.140751000  |
| 6 | -2.946297000 | -1.029922000 | -1.408823000 |
| 1 | -3.108711000 | -0.069972000 | -1.930100000 |
| 1 | -2.154514000 | -1.584843000 | -1.937564000 |
| 1 | -3.880286000 | -1.616248000 | -1.460609000 |
| 6 | -3.682545000 | -0.073609000 | 0.818690000  |

|    |              |              |             |
|----|--------------|--------------|-------------|
| 1  | -4.564663000 | -0.733888000 | 0.865280000 |
| 1  | -3.384376000 | 0.178893000  | 1.850115000 |
| 1  | -3.997358000 | 0.855067000  | 0.312717000 |
| 17 | 0.023970000  | 3.826343000  | 0.072061000 |

E = -1113.77052 au    ZPVE = 0.276356064 au

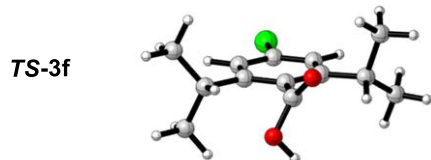

|    |              |              |              |
|----|--------------|--------------|--------------|
| 6  | -1.160022000 | 1.397129000  | 0.061435000  |
| 6  | -1.222157000 | -0.008829000 | 0.073362000  |
| 6  | -0.010596000 | -0.740960000 | -0.004912000 |
| 6  | 1.248650000  | -0.089473000 | -0.078195000 |
| 6  | 1.273698000  | 1.318177000  | -0.092859000 |
| 6  | 0.078223000  | 2.044950000  | -0.027443000 |
| 1  | -2.072630000 | 1.996323000  | 0.123447000  |
| 1  | 2.221271000  | 1.858990000  | -0.155716000 |
| 6  | -0.052649000 | -2.241702000 | -0.003972000 |
| 8  | 0.500947000  | -2.946990000 | 0.808471000  |
| 8  | -0.830742000 | -2.779941000 | -1.029348000 |
| 1  | -0.236041000 | -2.920343000 | -1.783311000 |
| 6  | 2.560476000  | -0.863116000 | -0.097558000 |
| 1  | 2.357016000  | -1.880711000 | -0.474734000 |
| 6  | -2.579820000 | -0.690806000 | 0.177060000  |
| 1  | -2.418132000 | -1.758462000 | 0.400722000  |
| 6  | -3.424942000 | -0.111007000 | 1.321578000  |
| 1  | -4.355277000 | -0.693616000 | 1.434750000  |
| 1  | -2.877348000 | -0.142756000 | 2.278230000  |
| 1  | -3.713904000 | 0.935684000  | 1.125115000  |
| 6  | -3.323269000 | -0.602328000 | -1.164316000 |
| 1  | -3.503200000 | 0.452364000  | -1.438831000 |
| 1  | -2.732429000 | -1.078403000 | -1.962284000 |
| 1  | -4.300690000 | -1.111855000 | -1.101297000 |
| 6  | 3.100155000  | -1.002009000 | 1.335897000  |
| 1  | 4.043771000  | -1.575457000 | 1.341564000  |
| 1  | 3.299388000  | -0.003732000 | 1.764631000  |
| 1  | 2.368814000  | -1.522729000 | 1.972955000  |
| 6  | 3.612241000  | -0.235565000 | -1.023073000 |
| 1  | 4.485126000  | -0.905401000 | -1.104010000 |
| 1  | 3.211380000  | -0.063569000 | -2.036132000 |
| 1  | 3.978849000  | 0.727867000  | -0.629873000 |
| 17 | 0.134263000  | 3.791441000  | -0.050014000 |

E = -1113.755603 au    ZPVE = 0.274464749 au     $\nu_i = 569.07i \text{ cm}^{-1}$

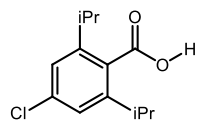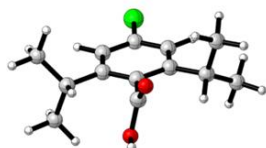

**Z-3f**

|    |              |              |              |
|----|--------------|--------------|--------------|
| 6  | 1.209600000  | 1.379480000  | -0.073759000 |
| 6  | 1.224878000  | -0.028525000 | -0.084905000 |
| 6  | -0.008943000 | -0.714681000 | -0.001949000 |
| 6  | -1.244471000 | -0.028797000 | 0.082622000  |
| 6  | -1.228371000 | 1.378324000  | 0.086123000  |
| 6  | -0.008860000 | 2.065096000  | 0.010034000  |
| 1  | 2.140546000  | 1.949967000  | -0.132145000 |
| 1  | -2.158114000 | 1.949180000  | 0.151155000  |
| 6  | -0.020220000 | -2.214213000 | -0.034129000 |
| 8  | -0.388667000 | -2.900164000 | -0.968712000 |
| 8  | 0.430551000  | -2.739636000 | 1.135524000  |
| 1  | 0.396249000  | -3.706799000 | 1.002408000  |
| 6  | -2.562228000 | -0.788717000 | 0.118809000  |
| 1  | -2.359362000 | -1.791591000 | 0.537298000  |
| 6  | 2.549638000  | -0.774557000 | -0.147055000 |
| 1  | 2.337539000  | -1.820927000 | -0.430344000 |
| 6  | 3.493704000  | -0.200780000 | -1.213107000 |
| 1  | 4.393519000  | -0.833488000 | -1.300585000 |
| 1  | 3.003026000  | -0.155955000 | -2.199492000 |
| 1  | 3.832112000  | 0.815827000  | -0.949376000 |
| 6  | 3.213395000  | -0.784218000 | 1.239390000  |
| 1  | 3.433474000  | 0.247781000  | 1.565518000  |
| 1  | 2.548306000  | -1.251000000 | 1.983313000  |
| 1  | 4.163714000  | -1.346101000 | 1.213139000  |
| 6  | -3.096444000 | -0.971083000 | -1.312058000 |
| 1  | -3.290784000 | 0.014514000  | -1.771220000 |
| 1  | -2.364688000 | -1.511854000 | -1.932337000 |
| 1  | -4.042194000 | -1.541038000 | -1.303857000 |
| 6  | -3.611811000 | -0.124803000 | 1.019678000  |
| 1  | -4.493712000 | -0.780961000 | 1.113227000  |
| 1  | -3.213742000 | 0.068606000  | 2.029676000  |
| 1  | -3.962244000 | 0.832050000  | 0.596317000  |
| 17 | -0.009289000 | 3.813237000  | 0.020861000  |

E = -1113.776582 au      ZPVE = 0.276176749 au

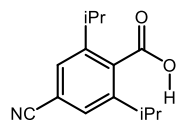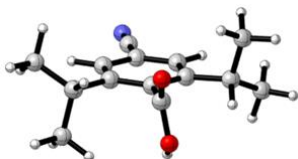

**E-3g**

|   |              |              |             |
|---|--------------|--------------|-------------|
| 6 | -1.229721000 | 1.472710000  | 0.074802000 |
| 6 | -1.238801000 | 0.067113000  | 0.110227000 |
| 6 | 0.002308000  | -0.610551000 | 0.003018000 |

|   |              |              |              |
|---|--------------|--------------|--------------|
| 6 | 1.236914000  | 0.081416000  | -0.089664000 |
| 6 | 1.212991000  | 1.486997000  | -0.104780000 |
| 6 | -0.013689000 | 2.177721000  | -0.034795000 |
| 1 | -2.163039000 | 2.038166000  | 0.143139000  |
| 1 | 2.141248000  | 2.061236000  | -0.169889000 |
| 6 | 0.023814000  | -2.119694000 | 0.025688000  |
| 8 | -0.029122000 | -2.797806000 | 1.027102000  |
| 8 | 0.111976000  | -2.700105000 | -1.207506000 |
| 1 | 0.148152000  | -1.978135000 | -1.856407000 |
| 6 | 2.550553000  | -0.686786000 | -0.060045000 |
| 1 | 2.379156000  | -1.667356000 | -0.540601000 |
| 6 | -2.543488000 | -0.711396000 | 0.204765000  |
| 1 | -2.323512000 | -1.651693000 | 0.740537000  |
| 6 | -3.627161000 | 0.027040000  | 1.000013000  |
| 1 | -4.490137000 | -0.640585000 | 1.159610000  |
| 1 | -3.254241000 | 0.351112000  | 1.985505000  |
| 1 | -3.996697000 | 0.914132000  | 0.457424000  |
| 6 | -3.049756000 | -1.066101000 | -1.205074000 |
| 1 | -3.234900000 | -0.146632000 | -1.788156000 |
| 1 | -2.317535000 | -1.684709000 | -1.748507000 |
| 1 | -3.993780000 | -1.634761000 | -1.145628000 |
| 6 | 2.948260000  | -0.943653000 | 1.405241000  |
| 1 | 3.115842000  | 0.016463000  | 1.924436000  |
| 1 | 2.156357000  | -1.495472000 | 1.936919000  |
| 1 | 3.880294000  | -1.532880000 | 1.454871000  |
| 6 | 3.682231000  | 0.008687000  | -0.825872000 |
| 1 | 4.562049000  | -0.654288000 | -0.874358000 |
| 1 | 3.382319000  | 0.261148000  | -1.856771000 |
| 1 | 4.001284000  | 0.936431000  | -0.321029000 |
| 6 | -0.024575000 | 3.620881000  | -0.067250000 |
| 7 | -0.033567000 | 4.809258000  | -0.096501000 |

E = -746.726484 au      ZPVE = 0.283805514 au

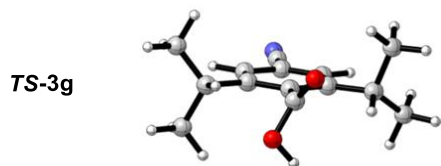

|   |              |              |              |
|---|--------------|--------------|--------------|
| 6 | -1.170946000 | 1.476785000  | 0.062832000  |
| 6 | -1.222161000 | 0.071984000  | 0.074939000  |
| 6 | -0.001956000 | -0.646491000 | -0.005017000 |
| 6 | 1.254578000  | 0.010768000  | -0.080160000 |
| 6 | 1.268549000  | 1.416893000  | -0.093093000 |
| 6 | 0.065086000  | 2.146699000  | -0.026030000 |
| 1 | -2.090307000 | 2.066867000  | 0.123691000  |
| 1 | 2.213727000  | 1.963124000  | -0.156178000 |
| 6 | -0.036002000 | -2.149375000 | 0.000037000  |
| 8 | 0.477052000  | -2.845064000 | 0.845906000  |
| 8 | -0.762170000 | -2.691483000 | -1.058024000 |

|   |              |              |              |
|---|--------------|--------------|--------------|
| 1 | -0.136198000 | -2.829627000 | -1.786927000 |
| 6 | 2.565924000  | -0.762364000 | -0.099718000 |
| 1 | 2.362367000  | -1.778470000 | -0.482172000 |
| 6 | -2.568952000 | -0.630607000 | 0.170468000  |
| 1 | -2.391470000 | -1.696037000 | 0.394777000  |
| 6 | -3.429240000 | -0.063877000 | 1.310117000  |
| 1 | -4.351439000 | -0.660190000 | 1.416422000  |
| 1 | -2.887907000 | -0.088632000 | 2.270483000  |
| 1 | -3.732312000 | 0.978404000  | 1.111846000  |
| 6 | -3.303304000 | -0.551769000 | -1.176818000 |
| 1 | -3.498430000 | 0.500265000  | -1.450822000 |
| 1 | -2.699625000 | -1.017478000 | -1.971302000 |
| 1 | -4.272641000 | -1.076875000 | -1.120738000 |
| 6 | 3.099999000  | -0.906539000 | 1.335592000  |
| 1 | 3.300128000  | 0.090111000  | 1.767412000  |
| 1 | 2.366160000  | -1.427516000 | 1.969640000  |
| 1 | 4.042402000  | -1.481563000 | 1.341868000  |
| 6 | 3.619625000  | -0.130451000 | -1.019860000 |
| 1 | 4.493183000  | -0.799209000 | -1.100054000 |
| 1 | 3.222400000  | 0.044633000  | -2.033707000 |
| 1 | 3.983865000  | 0.831621000  | -0.621427000 |
| 6 | 0.100320000  | 3.589572000  | -0.044583000 |
| 7 | 0.129725000  | 4.777940000  | -0.061158000 |

E = -746.711756 au    ZPVE = 0.281883203 au     $\nu_i = 570.62i \text{ cm}^{-1}$

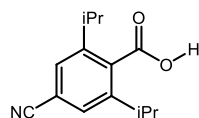

**Z-3g**

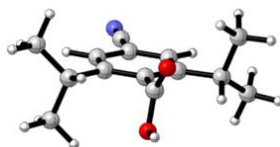

|   |              |              |              |
|---|--------------|--------------|--------------|
| 6 | -1.229465000 | 1.459371000  | 0.077292000  |
| 6 | -1.229842000 | 0.053078000  | 0.091232000  |
| 6 | 0.014047000  | -0.615576000 | 0.006324000  |
| 6 | 1.244584000  | 0.079344000  | -0.082991000 |
| 6 | 1.213849000  | 1.484508000  | -0.086112000 |
| 6 | -0.015788000 | 2.170264000  | -0.008315000 |
| 1 | -2.168176000 | 2.018162000  | 0.134735000  |
| 1 | 2.139226000  | 2.063325000  | -0.153156000 |
| 6 | 0.039156000  | -2.116615000 | 0.045510000  |
| 8 | 0.311236000  | -2.791584000 | 1.019592000  |
| 8 | -0.278974000 | -2.646977000 | -1.163276000 |
| 1 | -0.242950000 | -3.614322000 | -1.030176000 |
| 6 | 2.562071000  | -0.679519000 | -0.117770000 |
| 1 | 2.361133000  | -1.673641000 | -0.558491000 |
| 6 | -2.538475000 | -0.720055000 | 0.142493000  |
| 1 | -2.308338000 | -1.752664000 | 0.461740000  |
| 6 | -3.523906000 | -0.140012000 | 1.166423000  |
| 1 | -4.407998000 | -0.794565000 | 1.250191000  |
| 1 | -3.061034000 | -0.052398000 | 2.163237000  |

|   |              |              |              |
|---|--------------|--------------|--------------|
| 1 | -3.883174000 | 0.857901000  | 0.862246000  |
| 6 | -3.162632000 | -0.781533000 | -1.261517000 |
| 1 | -3.397834000 | 0.236243000  | -1.619910000 |
| 1 | -2.467227000 | -1.250959000 | -1.975557000 |
| 1 | -4.099627000 | -1.365332000 | -1.245211000 |
| 6 | 3.076818000  | -0.886828000 | 1.317295000  |
| 1 | 3.270255000  | 0.090663000  | 1.793540000  |
| 1 | 2.336140000  | -1.433060000 | 1.922327000  |
| 1 | 4.019900000  | -1.460777000 | 1.311177000  |
| 6 | 3.622794000  | -0.000376000 | -0.993420000 |
| 1 | 4.505129000  | -0.655572000 | -1.087195000 |
| 1 | 3.238030000  | 0.210890000  | -2.004923000 |
| 1 | 3.968173000  | 0.948146000  | -0.547924000 |
| 6 | -0.031414000 | 3.613805000  | -0.018713000 |
| 7 | -0.044357000 | 4.802472000  | -0.027652000 |

E = -746.732956 au      ZPVE = 0.283654837 au

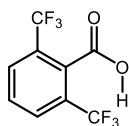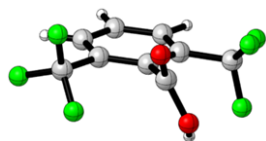

**E-4a**

|   |              |              |              |
|---|--------------|--------------|--------------|
| 6 | 1.227506000  | 2.093738000  | 0.014189000  |
| 6 | 1.220849000  | 0.689493000  | 0.004832000  |
| 6 | 0.002695000  | -0.026780000 | -0.022780000 |
| 6 | -1.206110000 | 0.706668000  | -0.054935000 |
| 6 | -1.197460000 | 2.111712000  | -0.062170000 |
| 6 | 0.020078000  | 2.804231000  | -0.033604000 |
| 1 | 2.180299000  | 2.626539000  | 0.055860000  |
| 1 | -2.143681000 | 2.656326000  | -0.098362000 |
| 6 | 0.024492000  | -1.542718000 | -0.144273000 |
| 8 | 0.488741000  | -2.104588000 | -1.106599000 |
| 8 | -0.502583000 | -2.223681000 | 0.898321000  |
| 1 | -0.824388000 | -1.586153000 | 1.554424000  |
| 6 | -2.538168000 | -0.007132000 | -0.034344000 |
| 6 | 2.549408000  | -0.038053000 | 0.051847000  |
| 1 | 0.027826000  | 3.898250000  | -0.038760000 |
| 9 | 2.931096000  | -0.461211000 | -1.160329000 |
| 9 | 2.492995000  | -1.106750000 | 0.871277000  |
| 9 | 3.524084000  | 0.769788000  | 0.520217000  |
| 9 | -2.787673000 | -0.505237000 | 1.205865000  |
| 9 | -2.576914000 | -1.036784000 | -0.893578000 |
| 9 | -3.555706000 | 0.816220000  | -0.334508000 |

E = -1092.232597 au      ZPVE = 0.125429801 au

For deuterated acid (**E-7a**): ZPVE = 0.121953466 au

**TS-4a**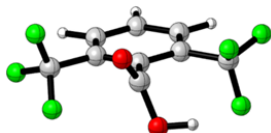

|   |              |              |              |
|---|--------------|--------------|--------------|
| 6 | -1.236274000 | 2.094438000  | -0.042095000 |
| 6 | -1.225649000 | 0.690245000  | -0.010026000 |
| 6 | -0.007140000 | -0.023199000 | 0.027484000  |
| 6 | 1.197973000  | 0.714979000  | 0.044286000  |
| 6 | 1.187513000  | 2.119553000  | 0.032977000  |
| 6 | -0.031275000 | 2.809147000  | -0.009352000 |
| 1 | -2.190820000 | 2.623364000  | -0.091380000 |
| 1 | 2.132804000  | 2.666688000  | 0.063078000  |
| 6 | -0.014695000 | -1.537840000 | 0.119798000  |
| 8 | -0.484910000 | -2.124011000 | 1.062335000  |
| 8 | 0.472411000  | -2.165229000 | -1.004608000 |
| 1 | 1.433995000  | -2.252932000 | -0.918013000 |
| 6 | 2.532770000  | 0.012780000  | 0.043113000  |
| 6 | -2.551312000 | -0.042359000 | -0.038137000 |
| 1 | -0.041662000 | 3.903004000  | -0.022776000 |
| 9 | -2.913949000 | -0.459509000 | 1.184537000  |
| 9 | -2.501180000 | -1.117807000 | -0.847132000 |
| 9 | -3.536934000 | 0.756679000  | -0.496860000 |
| 9 | 2.865818000  | -0.411785000 | -1.199154000 |
| 9 | 2.522083000  | -1.089182000 | 0.830939000  |
| 9 | 3.525739000  | 0.804639000  | 0.472002000  |

$E = -1092.219459$  au     $ZPVE = 0.123748861$  au     $\nu_i = 562.78i$   $\text{cm}^{-1}$

For deuterated acid (**TS-7a**):  $ZPVE = 0.120524191$  au     $\nu_i = 416.45i$   $\text{cm}^{-1}$

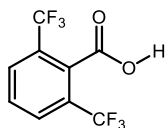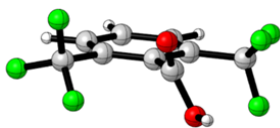**Z-4a**

|   |              |              |              |
|---|--------------|--------------|--------------|
| 6 | 1.226308000  | 2.100601000  | 0.040482000  |
| 6 | 1.225076000  | 0.696622000  | 0.013372000  |
| 6 | 0.009214000  | -0.021230000 | -0.014885000 |
| 6 | -1.204628000 | 0.700128000  | -0.028113000 |
| 6 | -1.199661000 | 2.105402000  | -0.016518000 |
| 6 | 0.014203000  | 2.804017000  | 0.019093000  |
| 1 | 2.176739000  | 2.637509000  | 0.080274000  |
| 1 | -2.148141000 | 2.646851000  | -0.042185000 |
| 6 | 0.026211000  | -1.528979000 | -0.093314000 |
| 8 | 0.473407000  | -2.158677000 | -1.026731000 |
| 8 | -0.517920000 | -2.071923000 | 1.015812000  |
| 1 | -0.497522000 | -3.035630000 | 0.863506000  |
| 6 | -2.542908000 | -0.007148000 | -0.041334000 |
| 6 | 2.554250000  | -0.028384000 | 0.026984000  |
| 1 | 0.015772000  | 3.898079000  | 0.032469000  |

|   |              |              |              |
|---|--------------|--------------|--------------|
| 9 | 2.899241000  | -0.458758000 | -1.195963000 |
| 9 | 2.525977000  | -1.096847000 | 0.849384000  |
| 9 | 3.544119000  | 0.779133000  | 0.460805000  |
| 9 | -2.915424000 | -0.385370000 | 1.193427000  |
| 9 | -2.522996000 | -1.106982000 | -0.820133000 |
| 9 | -3.513043000 | 0.799027000  | -0.518777000 |

E = -1092.239285 au      ZPVE = 0.125541912 au

For deuterated acid (**Z-7a**): ZPVE = 0.122089179 au

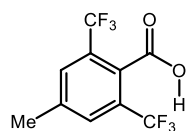

**E-4b**

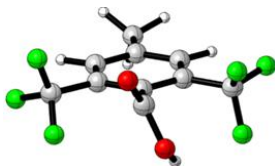

|   |              |              |              |
|---|--------------|--------------|--------------|
| 6 | 1.231208000  | 1.813394000  | 0.017726000  |
| 6 | 1.218372000  | 0.410652000  | 0.007813000  |
| 6 | -0.002020000 | -0.301689000 | -0.018899000 |
| 6 | -1.201355000 | 0.445485000  | -0.051537000 |
| 6 | -1.178245000 | 1.850022000  | -0.058140000 |
| 6 | 0.036686000  | 2.554889000  | -0.030611000 |
| 1 | 2.191309000  | 2.335945000  | 0.056048000  |
| 1 | -2.123297000 | 2.398550000  | -0.098785000 |
| 6 | 0.008695000  | -1.816547000 | -0.141760000 |
| 8 | 0.478705000  | -2.383963000 | -1.098167000 |
| 8 | -0.535558000 | -2.493363000 | 0.895461000  |
| 1 | -0.858019000 | -1.852363000 | 1.547795000  |
| 6 | -2.541196000 | -0.252444000 | -0.036539000 |
| 6 | 2.544230000  | -0.320991000 | 0.051143000  |
| 9 | 2.922861000  | -0.744745000 | -1.162229000 |
| 9 | 2.486933000  | -1.390278000 | 0.869903000  |
| 9 | 3.524459000  | 0.482386000  | 0.517927000  |
| 9 | -2.801924000 | -0.749652000 | 1.202363000  |
| 9 | -2.589561000 | -1.281149000 | -0.896931000 |
| 9 | -3.549883000 | 0.581792000  | -0.339177000 |
| 6 | 0.064584000  | 4.064065000  | -0.008811000 |
| 1 | -0.874115000 | 4.484746000  | -0.401454000 |
| 1 | 0.197476000  | 4.433771000  | 1.022686000  |
| 1 | 0.899749000  | 4.451766000  | -0.613655000 |

E = -1131.419433 au      ZPVE = 0.152943044 au

**TS-4b**

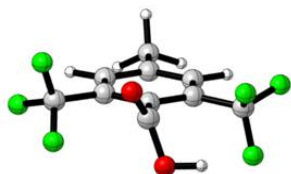

|   |              |             |              |
|---|--------------|-------------|--------------|
| 6 | -1.242192000 | 1.811494000 | -0.044406000 |
| 6 | -1.223019000 | 0.408687000 | -0.009322000 |



|   |              |              |              |
|---|--------------|--------------|--------------|
| 6 | -0.001200000 | -0.298650000 | 0.030500000  |
| 6 | 1.193244000  | 0.455344000  | 0.045200000  |
| 6 | 1.166013000  | 1.859181000  | 0.031690000  |
| 6 | -0.051524000 | 2.559002000  | -0.013257000 |
| 1 | -2.204388000 | 2.328369000  | -0.100063000 |
| 1 | 2.109513000  | 2.411939000  | 0.057642000  |
| 6 | 0.004370000  | -1.812185000 | 0.121864000  |
| 8 | -0.473112000 | -2.404290000 | 1.057269000  |
| 8 | 0.512267000  | -2.436253000 | -0.995948000 |
| 1 | 1.473578000  | -2.511801000 | -0.896917000 |
| 6 | 2.537195000  | -0.227726000 | 0.042305000  |
| 6 | -2.544602000 | -0.330289000 | -0.039924000 |
| 9 | -2.907485000 | -0.750821000 | 1.181936000  |
| 9 | -2.489222000 | -1.404941000 | -0.849966000 |
| 9 | -3.535570000 | 0.463185000  | -0.498850000 |
| 9 | 2.879792000  | -0.641665000 | -1.200906000 |
| 9 | 2.541124000  | -1.334315000 | 0.825079000  |
| 9 | 3.519775000  | 0.574674000  | 0.477606000  |
| 6 | -0.084980000 | 4.068135000  | 0.001808000  |
| 1 | -0.218648000 | 4.440969000  | 1.032128000  |
| 1 | 0.852477000  | 4.491083000  | -0.391781000 |
| 1 | -0.921317000 | 4.450770000  | -0.604424000 |

E = -1131.406212 au    ZPVE = 0.151268558 au     $\nu_i = 560.48i \text{ cm}^{-1}$

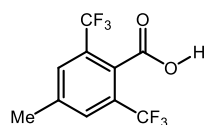

**Z-4b**

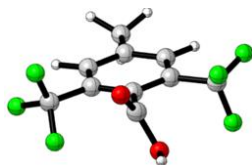

|   |              |              |              |
|---|--------------|--------------|--------------|
| 6 | -1.225119000 | 1.825078000  | -0.023492000 |
| 6 | -1.222331000 | 0.422040000  | -0.007624000 |
| 6 | -0.006890000 | -0.296046000 | 0.013344000  |
| 6 | 1.200351000  | 0.434921000  | 0.033842000  |
| 6 | 1.185696000  | 1.839421000  | 0.033925000  |
| 6 | -0.023429000 | 2.554843000  | 0.004325000  |
| 1 | -2.180973000 | 2.355494000  | -0.054684000 |
| 1 | 2.134923000  | 2.381367000  | 0.069476000  |
| 6 | -0.017749000 | -1.803155000 | 0.081154000  |
| 8 | -0.470462000 | -2.443237000 | 1.005055000  |
| 8 | 0.539013000  | -2.336527000 | -1.026971000 |
| 1 | 0.522699000  | -3.301008000 | -0.879518000 |
| 6 | 2.543697000  | -0.261538000 | 0.045953000  |
| 6 | -2.551167000 | -0.302397000 | -0.023415000 |
| 9 | -2.895051000 | -0.741423000 | 1.197146000  |
| 9 | -2.525137000 | -1.365418000 | -0.853247000 |
| 9 | -3.543447000 | 0.507286000  | -0.449899000 |
| 9 | 2.924062000  | -0.628006000 | -1.190377000 |
| 9 | 2.530660000  | -1.367769000 | 0.816389000  |
| 9 | 3.507813000  | 0.547438000  | 0.532533000  |

|   |              |             |              |
|---|--------------|-------------|--------------|
| 6 | -0.033701000 | 4.064001000 | -0.036639000 |
| 1 | 0.872579000  | 4.479820000 | 0.430825000  |
| 1 | -0.070422000 | 4.421865000 | -1.080256000 |
| 1 | -0.913446000 | 4.468595000 | 0.488356000  |

E = -1131.425973 au    ZPVE = 0.15305388 au

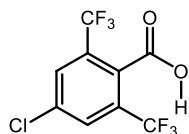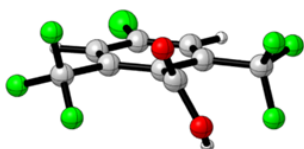

**E-4c**

|    |              |              |              |
|----|--------------|--------------|--------------|
| 6  | -1.288172000 | 1.533961000  | -0.029575000 |
| 6  | -1.220857000 | 0.133023000  | -0.012015000 |
| 6  | 0.022144000  | -0.539127000 | 0.017524000  |
| 6  | 1.199301000  | 0.243718000  | 0.047266000  |
| 6  | 1.143407000  | 1.646066000  | 0.048576000  |
| 1  | -2.254700000 | 2.039786000  | -0.074594000 |
| 1  | 2.060885000  | 2.236765000  | 0.082743000  |
| 6  | 0.057586000  | -2.053694000 | 0.151216000  |
| 8  | -0.392301000 | -2.623178000 | 1.115825000  |
| 8  | 0.617649000  | -2.722862000 | -0.880833000 |
| 1  | 0.914559000  | -2.081017000 | -1.544462000 |
| 6  | -2.525123000 | -0.641116000 | -0.054720000 |
| 6  | 2.561751000  | -0.414318000 | 0.031973000  |
| 6  | -0.104105000 | 2.282905000  | 0.016151000  |
| 17 | -0.183017000 | 4.016776000  | 0.016372000  |
| 9  | -2.886696000 | -1.071441000 | 1.160007000  |
| 9  | -3.526673000 | 0.130847000  | -0.524281000 |
| 9  | -2.429045000 | -1.708680000 | -0.870177000 |
| 9  | 3.542955000  | 0.453759000  | 0.322783000  |
| 9  | 2.827277000  | -0.912878000 | -1.203421000 |
| 9  | 2.640202000  | -1.431708000 | 0.901722000  |

E = -1551.282849 au    ZPVE = 0.115652845 au

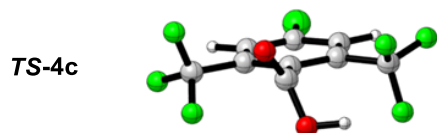

|   |              |              |              |
|---|--------------|--------------|--------------|
| 6 | -1.321239000 | 1.511437000  | -0.034368000 |
| 6 | -1.225951000 | 0.111905000  | -0.006899000 |
| 6 | 0.028716000  | -0.536236000 | 0.026858000  |
| 6 | 1.188290000  | 0.270927000  | 0.047106000  |
| 6 | 1.106523000  | 1.671720000  | 0.042678000  |
| 1 | -2.297818000 | 1.997180000  | -0.082154000 |
| 1 | 2.012479000  | 2.280379000  | 0.075640000  |

|    |              |              |              |
|----|--------------|--------------|--------------|
| 6  | 0.104292000  | -2.049397000 | 0.113608000  |
| 8  | -0.343647000 | -2.662737000 | 1.049645000  |
| 8  | 0.633996000  | -2.644893000 | -1.007756000 |
| 1  | 1.598808000  | -2.676495000 | -0.918262000 |
| 6  | -2.513834000 | -0.688797000 | -0.036901000 |
| 6  | 2.564009000  | -0.351487000 | 0.045245000  |
| 6  | -0.152784000 | 2.284090000  | 0.002177000  |
| 17 | -0.265276000 | 4.016512000  | -0.010805000 |
| 9  | -2.846980000 | -1.131955000 | 1.183730000  |
| 9  | -3.539639000 | 0.062199000  | -0.486080000 |
| 9  | -2.407605000 | -1.752139000 | -0.854715000 |
| 9  | 2.917679000  | -0.753918000 | -1.197256000 |
| 9  | 2.614460000  | -1.451315000 | 0.832879000  |
| 9  | 3.507119000  | 0.497606000  | 0.474367000  |

E = -1551.269738 au    ZPVE = 0.113974996 au     $\nu_i = 563.57i \text{ cm}^{-1}$

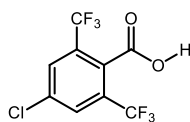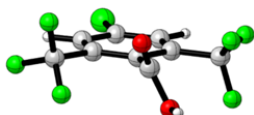

**Z-4c**

|    |              |              |              |
|----|--------------|--------------|--------------|
| 6  | -1.263442000 | 1.561739000  | -0.028980000 |
| 6  | -1.224774000 | 0.159716000  | -0.008354000 |
| 6  | 0.004512000  | -0.534822000 | 0.015040000  |
| 6  | 1.200015000  | 0.216216000  | 0.032248000  |
| 6  | 1.171068000  | 1.619678000  | 0.029839000  |
| 1  | -2.218989000 | 2.088251000  | -0.066647000 |
| 1  | 2.100492000  | 2.191700000  | 0.059729000  |
| 6  | 0.019921000  | -2.042664000 | 0.085931000  |
| 8  | -0.426008000 | -2.685647000 | 1.010751000  |
| 8  | 0.590296000  | -2.566585000 | -1.018410000 |
| 1  | 0.591539000  | -3.531524000 | -0.872184000 |
| 6  | -2.542705000 | -0.589206000 | -0.025813000 |
| 6  | 2.557715000  | -0.457134000 | 0.043849000  |
| 6  | -0.062261000 | 2.283138000  | -0.002917000 |
| 17 | -0.103162000 | 4.019284000  | -0.014460000 |
| 9  | -2.874598000 | -1.034184000 | 1.194256000  |
| 9  | -3.545951000 | 0.204704000  | -0.451014000 |
| 9  | -2.493666000 | -1.648330000 | -0.857473000 |
| 9  | 3.505928000  | 0.373762000  | 0.520225000  |
| 9  | 2.935301000  | -0.824606000 | -1.191295000 |
| 9  | 2.562553000  | -1.555608000 | 0.823205000  |

E = -1551.2898 au    ZPVE = 0.115778805 au

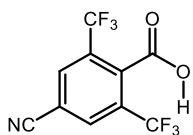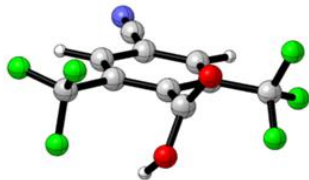

**E-4d**

|   |              |              |              |
|---|--------------|--------------|--------------|
| 6 | -1.270246000 | 1.634511000  | 0.027268000  |
| 6 | -1.223261000 | 0.234251000  | 0.011910000  |
| 6 | 0.012046000  | -0.452838000 | -0.016815000 |
| 6 | 1.202462000  | 0.310285000  | -0.047734000 |
| 6 | 1.166524000  | 1.711589000  | -0.051966000 |
| 6 | -0.073870000 | 2.374682000  | -0.019599000 |
| 1 | -2.230916000 | 2.152373000  | 0.071598000  |
| 1 | 2.094065000  | 2.287185000  | -0.086680000 |
| 6 | 0.025601000  | -1.968698000 | -0.155725000 |
| 8 | -0.423376000 | -2.520989000 | -1.130508000 |
| 8 | 0.563051000  | -2.652317000 | 0.876982000  |
| 1 | 0.866213000  | -2.021428000 | 1.548473000  |
| 6 | 2.554107000  | -0.372456000 | -0.028616000 |
| 6 | -2.537048000 | -0.525968000 | 0.056410000  |
| 6 | -0.118229000 | 3.817477000  | -0.020594000 |
| 7 | -0.153866000 | 5.005240000  | -0.020087000 |
| 9 | 3.549465000  | 0.480011000  | -0.312754000 |
| 9 | 2.616055000  | -1.387608000 | -0.901081000 |
| 9 | 2.801423000  | -0.877375000 | 1.206706000  |
| 9 | -2.902243000 | -0.950523000 | -1.158086000 |
| 9 | -2.448758000 | -1.593947000 | 0.871406000  |
| 9 | -3.526857000 | 0.257735000  | 0.528051000  |

E = -1184.235653 au    ZPVE = 0.123053386 au  
 For deuterated acid (**E-7d**): ZPVE = 0.119583745 au

**TS-4d**

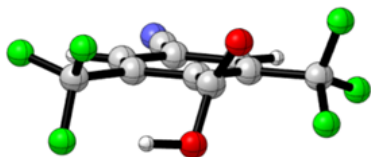

|   |              |              |              |
|---|--------------|--------------|--------------|
| 6 | 1.294472000  | 1.621788000  | -0.034157000 |
| 6 | 1.228854000  | 0.222113000  | -0.007241000 |
| 6 | -0.013707000 | -0.449278000 | 0.027042000  |
| 6 | -1.192214000 | 0.330422000  | 0.047357000  |
| 6 | -1.139888000 | 1.730779000  | 0.043843000  |
| 6 | 0.108487000  | 2.378077000  | 0.002885000  |
| 1 | 2.262172000  | 2.126044000  | -0.081577000 |
| 1 | -2.060193000 | 2.318365000  | 0.076483000  |
| 6 | -0.058158000 | -1.965078000 | 0.115567000  |
| 8 | 0.383278000  | -2.563154000 | 1.064100000  |
| 8 | -0.549819000 | -2.570921000 | -1.015492000 |
| 1 | -1.515595000 | -2.627293000 | -0.948123000 |
| 6 | -2.552795000 | -0.327700000 | 0.043792000  |
| 6 | 2.531257000  | -0.556964000 | -0.036669000 |

|   |              |              |              |
|---|--------------|--------------|--------------|
| 6 | 0.170993000  | 3.820294000  | -0.007844000 |
| 7 | 0.220741000  | 5.007387000  | -0.016704000 |
| 9 | -2.577376000 | -1.419888000 | 0.840599000  |
| 9 | -2.884044000 | -0.749120000 | -1.198205000 |
| 9 | -3.517927000 | 0.501903000  | 0.458267000  |
| 9 | 2.868400000  | -0.991345000 | 1.185079000  |
| 9 | 2.440009000  | -1.622359000 | -0.852625000 |
| 9 | 3.541711000  | 0.211593000  | -0.487133000 |

E = -1184.223076 au    ZPVE = 0.121248287 au     $\nu_1 = 565.38i \text{ cm}^{-1}$

For deuterated acid (**TS-7d**): ZPVE = 0.118181801 au     $\nu_1 = 418.35i \text{ cm}^{-1}$

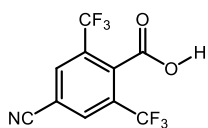

**Z-4d**

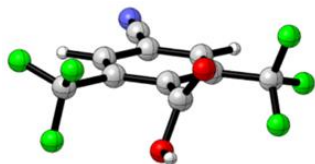

|   |              |              |              |
|---|--------------|--------------|--------------|
| 6 | -1.252787000 | 1.654877000  | 0.029159000  |
| 6 | -1.226671000 | 0.254140000  | 0.008924000  |
| 6 | -0.001449000 | -0.448389000 | -0.014155000 |
| 6 | 1.202746000  | 0.289310000  | -0.031994000 |
| 6 | 1.185817000  | 1.691394000  | -0.030751000 |
| 6 | -0.043589000 | 2.374304000  | 0.002206000  |
| 1 | -2.205243000 | 2.187938000  | 0.066568000  |
| 1 | 2.121886000  | 2.253388000  | -0.060149000 |
| 6 | 0.000505000  | -1.957847000 | -0.088683000 |
| 8 | -0.442417000 | -2.589548000 | -1.022280000 |
| 8 | 0.554171000  | -2.488309000 | 1.019428000  |
| 1 | 0.546448000  | -3.453731000 | 0.875549000  |
| 6 | 2.553572000  | -0.400931000 | -0.041554000 |
| 6 | -2.549961000 | -0.488039000 | 0.026925000  |
| 6 | -0.064610000 | 3.817932000  | 0.011268000  |
| 7 | -0.081885000 | 5.005957000  | 0.019094000  |
| 9 | 3.510617000  | 0.420290000  | -0.513900000 |
| 9 | 2.544913000  | -1.497149000 | -0.822784000 |
| 9 | 2.919554000  | -0.773781000 | 1.194384000  |
| 9 | -2.881561000 | -0.929275000 | -1.193489000 |
| 9 | -2.503616000 | -1.546746000 | 0.858218000  |
| 9 | -3.546060000 | 0.312555000  | 0.453028000  |

E = -1184.243001 au    ZPVE = 0.123208207 au

For deuterated acid (**Z-7d**): ZPVE = 0.119757769 au

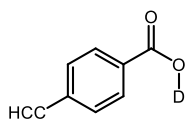

**E-5f**

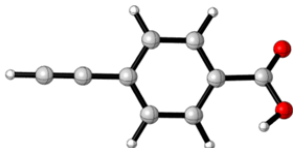

|          |              |              |              |
|----------|--------------|--------------|--------------|
| 6        | 1.107921000  | -1.220389000 | 0.130461000  |
| 6        | -0.290740000 | -1.231273000 | 0.113880000  |
| 6        | -1.011963000 | -0.026437000 | -0.007792000 |
| 6        | -0.310890000 | 1.188677000  | -0.154953000 |
| 6        | 1.090593000  | 1.204061000  | -0.152783000 |
| 6        | 1.814934000  | -0.000506000 | -0.001057000 |
| 1        | 1.669266000  | -2.153738000 | 0.238358000  |
| 1        | -0.848984000 | -2.168109000 | 0.198981000  |
| 1        | -0.847713000 | 2.131225000  | -0.314081000 |
| 1        | 1.635090000  | 2.145171000  | -0.277321000 |
| 6        | -2.514114000 | -0.109882000 | -0.026362000 |
| 8        | -3.117730000 | -1.123078000 | -0.303705000 |
| 8        | -3.182400000 | 1.035042000  | 0.287454000  |
| 1(iso=2) | -2.540138000 | 1.663008000  | 0.650600000  |
| 6        | 3.253756000  | 0.013531000  | 0.010801000  |
| 6        | 4.488624000  | 0.024461000  | 0.021674000  |
| 1        | 5.564795000  | 0.033281000  | 0.030252000  |

E = -495.540988 au      ZPVE = 0.119992367 au

**TS-5f**

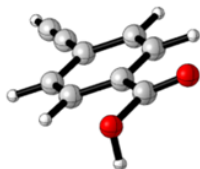

|          |              |              |              |
|----------|--------------|--------------|--------------|
| 6        | -1.124752000 | 1.230769000  | -0.041176000 |
| 6        | 0.273402000  | 1.253442000  | -0.031673000 |
| 6        | 1.002999000  | 0.046811000  | 0.011613000  |
| 6        | 0.318528000  | -1.184617000 | 0.059290000  |
| 6        | -1.082110000 | -1.210123000 | 0.053432000  |
| 6        | -1.818399000 | -0.003459000 | 0.000468000  |
| 1        | -1.696262000 | 2.163505000  | -0.078200000 |
| 1        | 0.821671000  | 2.199678000  | -0.059237000 |
| 1        | 0.888676000  | -2.115276000 | 0.115359000  |
| 1        | -1.620088000 | -2.162464000 | 0.094026000  |
| 6        | 2.497744000  | 0.119433000  | 0.017476000  |
| 8        | 3.118364000  | 1.157275000  | 0.081514000  |
| 8        | 3.136600000  | -1.116319000 | -0.004200000 |
| 1(iso=2) | 3.225491000  | -1.371177000 | -0.935225000 |
| 6        | -3.257166000 | -0.029702000 | -0.008235000 |
| 6        | -4.492096000 | -0.051229000 | -0.016620000 |
| 1        | -5.568092000 | -0.069860000 | -0.022695000 |

E = -495.531925 au      ZPVE = 0.118897833 au       $\nu_i = 392.85i \text{ cm}^{-1}$

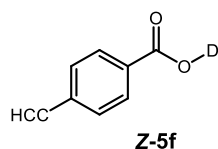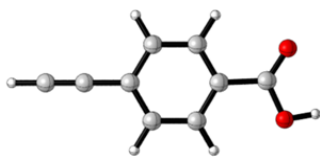

|          |              |              |              |
|----------|--------------|--------------|--------------|
| 6        | -1.122443000 | 1.227414000  | 0.000030000  |
| 6        | 0.276543000  | 1.241022000  | 0.000007000  |
| 6        | 0.995627000  | 0.029420000  | -0.000026000 |
| 6        | 0.306661000  | -1.200073000 | -0.000061000 |
| 6        | -1.093857000 | -1.215134000 | -0.000043000 |
| 6        | -1.823230000 | -0.002592000 | 0.000036000  |
| 1        | -1.687925000 | 2.164518000  | 0.000007000  |
| 1        | 0.832718000  | 2.182906000  | 0.000011000  |
| 1        | 0.869405000  | -2.136940000 | -0.000180000 |
| 1        | -1.637686000 | -2.164994000 | -0.000075000 |
| 6        | 2.487567000  | 0.105651000  | -0.000004000 |
| 8        | 3.128270000  | 1.140969000  | -0.000066000 |
| 8        | 3.067974000  | -1.122111000 | 0.000094000  |
| 1(iso=2) | 4.024635000  | -0.938956000 | 0.000175000  |
| 6        | -3.262356000 | -0.020055000 | 0.000034000  |
| 6        | -4.497447000 | -0.034129000 | -0.000008000 |
| 1        | -5.573490000 | -0.046534000 | 0.000042000  |

E = -495.55223 au      ZPVE = 0.120263713 au

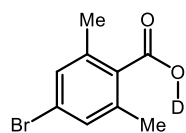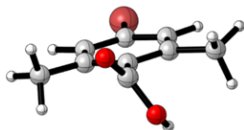

|          |              |              |              |
|----------|--------------|--------------|--------------|
| 6        | -0.588773000 | 1.227298000  | 0.071283000  |
| 6        | 0.816742000  | 1.253422000  | 0.046263000  |
| 6        | 1.518855000  | 0.024929000  | -0.023666000 |
| 6        | 0.833651000  | -1.211598000 | -0.113083000 |
| 6        | -0.574379000 | -1.207869000 | -0.105514000 |
| 6        | -1.271525000 | 0.003610000  | -0.004498000 |
| 1        | -1.151172000 | 2.163721000  | 0.138863000  |
| 1        | -1.124203000 | -2.150719000 | -0.187870000 |
| 6        | 3.024838000  | 0.058159000  | -0.058753000 |
| 8        | 3.679119000  | 0.658119000  | -0.882040000 |
| 8        | 3.636340000  | -0.649270000 | 0.934114000  |
| 1(iso=2) | 2.937023000  | -0.967838000 | 1.526099000  |
| 6        | 1.570334000  | -2.531782000 | -0.233049000 |
| 1        | 2.464255000  | -2.442456000 | -0.870473000 |
| 1        | 1.899308000  | -2.914970000 | 0.748920000  |
| 1        | 0.909655000  | -3.293516000 | -0.675595000 |
| 6        | 1.551023000  | 2.574986000  | 0.085472000  |
| 1        | 2.305763000  | 2.591310000  | 0.889522000  |

|    |              |              |              |
|----|--------------|--------------|--------------|
| 1  | 2.086780000  | 2.747374000  | -0.861031000 |
| 1  | 0.846379000  | 3.403365000  | 0.255927000  |
| 35 | -3.170916000 | -0.010114000 | 0.018066000  |

E = -3069.914946 au    ZPVE = 0.15730145 au

**TS-6d**

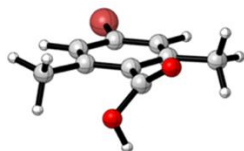

|          |              |              |              |
|----------|--------------|--------------|--------------|
| 6        | 0.572001000  | -1.205618000 | -0.107265000 |
| 6        | -0.835208000 | -1.213850000 | -0.112431000 |
| 6        | -1.524507000 | 0.025701000  | -0.031792000 |
| 6        | -0.813358000 | 1.254451000  | 0.035687000  |
| 6        | 0.592644000  | 1.224546000  | 0.068866000  |
| 6        | 1.273920000  | 0.002489000  | -0.004157000 |
| 1        | 1.120194000  | -2.149507000 | -0.186316000 |
| 1        | 1.155157000  | 2.160379000  | 0.141540000  |
| 6        | -3.024094000 | 0.075709000  | -0.047794000 |
| 8        | -3.671825000 | 0.897741000  | -0.656326000 |
| 8        | -3.642320000 | -0.933371000 | 0.686589000  |
| 1(iso=2) | -3.747953000 | -0.592474000 | 1.588281000  |
| 6        | -1.508045000 | 2.598948000  | 0.075935000  |
| 1        | -1.976619000 | 2.827507000  | -0.893571000 |
| 1        | -2.312448000 | 2.625095000  | 0.828709000  |
| 1        | -0.782017000 | 3.390703000  | 0.317819000  |
| 6        | -1.539907000 | -2.549582000 | -0.236277000 |
| 1        | -2.378367000 | -2.506579000 | -0.948344000 |
| 1        | -0.827846000 | -3.313777000 | -0.585876000 |
| 1        | -1.957087000 | -2.872469000 | 0.729814000  |
| 35       | 3.173128000  | -0.016017000 | 0.026320000  |

E = -3069.901752 au    ZPVE = 0.156455681 au     $\nu_i = 417.14i \text{ cm}^{-1}$

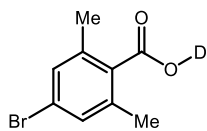

**Z-6d**

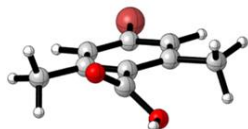

|   |              |              |              |
|---|--------------|--------------|--------------|
| 6 | -0.594169000 | 1.222541000  | 0.073545000  |
| 6 | 0.811973000  | 1.248821000  | 0.050955000  |
| 6 | 1.517455000  | 0.018750000  | -0.016362000 |
| 6 | 0.828504000  | -1.219241000 | -0.095075000 |
| 6 | -0.578968000 | -1.208751000 | -0.093298000 |
| 6 | -1.277831000 | 0.001818000  | -0.001565000 |
| 1 | -1.154719000 | 2.159809000  | 0.142162000  |
| 1 | -1.129059000 | -2.151915000 | -0.166535000 |
| 6 | 3.014568000  | 0.072734000  | -0.047316000 |
| 8 | 3.674977000  | 0.866777000  | -0.692076000 |



|          |              |              |              |
|----------|--------------|--------------|--------------|
| 8        | 3.583832000  | -0.862760000 | 0.756798000  |
| 1(iso=2) | 4.543326000  | -0.734505000 | 0.633751000  |
| 6        | 1.535370000  | -2.555165000 | -0.198651000 |
| 1        | 2.350575000  | -2.528552000 | -0.938858000 |
| 1        | 1.980970000  | -2.844760000 | 0.765622000  |
| 1        | 0.819483000  | -3.334361000 | -0.503922000 |
| 6        | 1.516023000  | 2.587635000  | 0.105071000  |
| 1        | 2.306457000  | 2.601099000  | 0.872654000  |
| 1        | 2.002229000  | 2.814805000  | -0.855912000 |
| 1        | 0.792683000  | 3.384500000  | 0.338083000  |
| 35       | -3.177713000 | -0.011803000 | 0.015182000  |

E = -3069.92255 au      ZPVE = 0.157857673 au

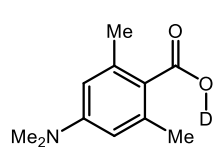

**E-6h**

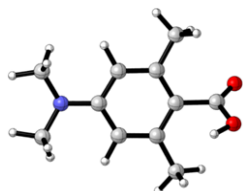

|          |              |              |              |
|----------|--------------|--------------|--------------|
| 6        | -0.867985000 | 1.220874000  | -0.023065000 |
| 6        | 0.533948000  | 1.246914000  | -0.003026000 |
| 6        | 1.250543000  | 0.025767000  | -0.037604000 |
| 6        | 0.550724000  | -1.201196000 | -0.137457000 |
| 6        | -0.853669000 | -1.191755000 | -0.178615000 |
| 6        | -1.598932000 | 0.010404000  | -0.125515000 |
| 1        | -1.391911000 | 2.177998000  | 0.028140000  |
| 1        | -1.364080000 | -2.153253000 | -0.271800000 |
| 6        | 2.752223000  | 0.065198000  | -0.011076000 |
| 8        | 3.440783000  | 0.756637000  | -0.729949000 |
| 8        | 3.336438000  | -0.748087000 | 0.919916000  |
| 1(iso=2) | 2.617260000  | -1.119382000 | 1.453685000  |
| 6        | 1.264447000  | -2.538934000 | -0.226529000 |
| 1        | 2.197389000  | -2.471733000 | -0.807567000 |
| 1        | 1.523029000  | -2.945254000 | 0.768367000  |
| 1        | 0.611701000  | -3.279960000 | -0.714943000 |
| 6        | 1.250145000  | 2.578894000  | 0.059765000  |
| 1        | 1.988936000  | 2.604612000  | 0.878110000  |
| 1        | 1.804792000  | 2.767674000  | -0.872458000 |
| 1        | 0.528829000  | 3.395838000  | 0.220026000  |
| 7        | -2.993966000 | 0.006917000  | -0.205023000 |
| 6        | -3.674103000 | -1.247599000 | 0.082626000  |
| 1        | -4.758855000 | -1.085358000 | 0.003100000  |
| 1        | -3.402665000 | -2.016099000 | -0.658364000 |
| 1        | -3.446360000 | -1.644200000 | 1.094427000  |
| 6        | -3.690417000 | 1.208562000  | 0.231974000  |
| 1        | -3.422935000 | 2.065873000  | -0.405519000 |
| 1        | -4.772613000 | 1.045381000  | 0.124324000  |
| 1        | -3.474064000 | 1.478277000  | 1.287020000  |

E = -631.535655 au    ZPVE = 0.241485371 au

TS-6h

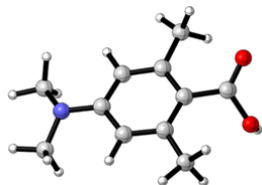

|          |              |              |              |
|----------|--------------|--------------|--------------|
| 6        | 0.850067000  | -1.192659000 | -0.167828000 |
| 6        | -0.552730000 | -1.205962000 | -0.126493000 |
| 6        | -1.256355000 | 0.026185000  | -0.043816000 |
| 6        | -0.528113000 | 1.246888000  | -0.016105000 |
| 6        | 0.874303000  | 1.215885000  | -0.028012000 |
| 6        | 1.601930000  | 0.005551000  | -0.120655000 |
| 1        | 1.359224000  | -2.155639000 | -0.248660000 |
| 1        | 1.399962000  | 2.171777000  | 0.025182000  |
| 6        | -2.748525000 | 0.085808000  | -0.006896000 |
| 8        | -3.416066000 | 0.971930000  | -0.496116000 |
| 8        | -3.363321000 | -0.992260000 | 0.635939000  |
| 1(iso=2) | -3.438585000 | -0.740129000 | 1.568775000  |
| 6        | -1.203604000 | 2.601479000  | 0.046940000  |
| 1        | -1.713171000 | 2.835024000  | -0.900426000 |
| 1        | -1.975008000 | 2.643718000  | 0.832674000  |
| 1        | -0.455750000 | 3.384249000  | 0.252391000  |
| 6        | -1.236084000 | -2.557955000 | -0.210599000 |
| 1        | -1.642407000 | -2.869082000 | 0.764099000  |
| 1        | -2.080366000 | -2.550430000 | -0.916471000 |
| 1        | -0.511312000 | -3.317490000 | -0.546010000 |
| 7        | 2.995734000  | -0.005512000 | -0.193498000 |
| 6        | 3.697755000  | 1.201064000  | 0.219082000  |
| 1        | 4.779056000  | 1.032795000  | 0.110144000  |
| 1        | 3.429354000  | 2.047604000  | -0.432353000 |
| 1        | 3.486461000  | 1.490161000  | 1.269971000  |
| 6        | 3.672560000  | -1.258640000 | 0.108821000  |
| 1        | 3.398863000  | -2.035241000 | -0.622684000 |
| 1        | 4.757720000  | -1.099862000 | 0.027469000  |
| 1        | 3.443690000  | -1.642087000 | 1.125148000  |

E = -631.522534 au    ZPVE = 0.240684239 au     $\nu_i = 413.28i \text{ cm}^{-1}$

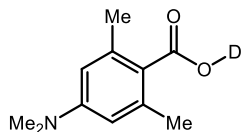

Z-6h

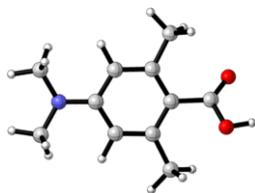

|   |              |             |              |
|---|--------------|-------------|--------------|
| 6 | -0.875754000 | 1.213803000 | -0.027520000 |
|---|--------------|-------------|--------------|

|          |              |              |              |
|----------|--------------|--------------|--------------|
| 6        | 0.526748000  | 1.241156000  | -0.003176000 |
| 6        | 1.248364000  | 0.018850000  | -0.030628000 |
| 6        | 0.544798000  | -1.211239000 | -0.113174000 |
| 6        | -0.858253000 | -1.194878000 | -0.159849000 |
| 6        | -1.606232000 | 0.005668000  | -0.123847000 |
| 1        | -1.398615000 | 2.171391000  | 0.021828000  |
| 1        | -1.369397000 | -2.157225000 | -0.234620000 |
| 6        | 2.739347000  | 0.080417000  | -0.001800000 |
| 8        | 3.423614000  | 0.950125000  | -0.514182000 |
| 8        | 3.301812000  | -0.945521000 | 0.696809000  |
| 1(iso=2) | 4.259978000  | -0.786044000 | 0.610562000  |
| 6        | 1.229337000  | -2.563271000 | -0.172721000 |
| 1        | 2.056027000  | -2.572580000 | -0.900058000 |
| 1        | 1.658068000  | -2.840636000 | 0.802742000  |
| 1        | 0.501819000  | -3.335815000 | -0.469365000 |
| 6        | 1.209855000  | 2.591233000  | 0.071901000  |
| 1        | 1.972334000  | 2.622463000  | 0.866464000  |
| 1        | 1.730126000  | 2.825606000  | -0.869355000 |
| 1        | 0.464747000  | 3.377597000  | 0.273629000  |
| 7        | -3.001047000 | -0.000964000 | -0.208631000 |
| 6        | -3.681799000 | -1.250477000 | 0.099992000  |
| 1        | -4.766200000 | -1.090838000 | 0.009491000  |
| 1        | -3.404242000 | -2.033529000 | -0.623099000 |
| 1        | -3.460728000 | -1.625834000 | 1.121181000  |
| 6        | -3.699915000 | 1.206594000  | 0.206963000  |
| 1        | -3.424647000 | 2.055305000  | -0.438675000 |
| 1        | -4.781416000 | 1.043565000  | 0.091324000  |
| 1        | -3.492903000 | 1.489359000  | 1.260511000  |

E = -631.542934 au      ZPVE = 0.242065657 au

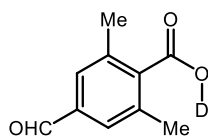

**E-6i**

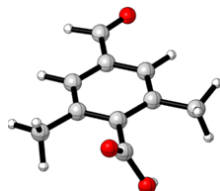

|          |              |              |              |
|----------|--------------|--------------|--------------|
| 6        | 1.125311000  | 1.417450000  | -0.084281000 |
| 6        | -0.275646000 | 1.310139000  | -0.049933000 |
| 6        | -0.842886000 | 0.013516000  | 0.021615000  |
| 6        | -0.038208000 | -1.153877000 | 0.101019000  |
| 6        | 1.357331000  | -1.003489000 | 0.080750000  |
| 6        | 1.939845000  | 0.272918000  | -0.018893000 |
| 1        | 1.590478000  | 2.409148000  | -0.151940000 |
| 1        | 2.017043000  | -1.875297000 | 0.151459000  |
| 6        | -2.344771000 | -0.108895000 | 0.070953000  |
| 8        | -3.043238000 | 0.372657000  | 0.934507000  |
| 8        | -2.893670000 | -0.816402000 | -0.956895000 |
| 1(iso=2) | -2.171604000 | -1.038329000 | -1.565779000 |
| 6        | -0.653575000 | -2.533823000 | 0.219824000  |

|   |              |              |              |
|---|--------------|--------------|--------------|
| 1 | -1.521244000 | -2.532967000 | 0.899200000  |
| 1 | -0.997191000 | -2.920918000 | -0.755117000 |
| 1 | 0.089192000  | -3.245176000 | 0.612702000  |
| 6 | -1.150060000 | 2.543140000  | -0.078430000 |
| 1 | -1.906187000 | 2.481256000  | -0.879117000 |
| 1 | -1.696404000 | 2.651724000  | 0.871686000  |
| 1 | -0.541718000 | 3.444980000  | -0.247417000 |
| 6 | 3.423179000  | 0.408276000  | -0.045533000 |
| 8 | 4.199510000  | -0.534921000 | 0.007617000  |
| 1 | 3.793696000  | 1.462780000  | -0.120056000 |

E = -611.025892 au    ZPVE = 0.176619793 au

TS-6i

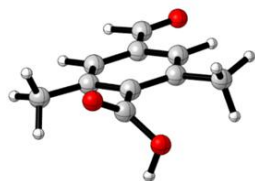

|          |              |              |              |
|----------|--------------|--------------|--------------|
| 6        | -1.130185000 | 1.412738000  | 0.093252000  |
| 6        | 0.271406000  | 1.310257000  | 0.047091000  |
| 6        | 0.847745000  | 0.012966000  | -0.029431000 |
| 6        | 0.039403000  | -1.156513000 | -0.105039000 |
| 6        | -1.355351000 | -1.002759000 | -0.084588000 |
| 6        | -1.943532000 | 0.269733000  | 0.025760000  |
| 1        | -1.595738000 | 2.403403000  | 0.171814000  |
| 1        | -2.012681000 | -1.876132000 | -0.156389000 |
| 6        | 2.345911000  | -0.092057000 | -0.061450000 |
| 8        | 3.063294000  | 0.625288000  | -0.721617000 |
| 8        | 2.865304000  | -1.119074000 | 0.720820000  |
| 1(iso=2) | 3.017956000  | -0.745861000 | 1.602877000  |
| 6        | 0.622140000  | -2.548299000 | -0.233277000 |
| 1        | -0.157493000 | -3.246112000 | -0.576839000 |
| 1        | 1.456086000  | -2.579598000 | -0.951879000 |
| 1        | 1.016261000  | -2.905780000 | 0.730330000  |
| 6        | 1.108809000  | 2.570443000  | 0.079154000  |
| 1        | 1.917548000  | 2.510717000  | 0.825670000  |
| 1        | 1.590889000  | 2.746163000  | -0.894825000 |
| 1        | 0.476090000  | 3.437291000  | 0.325920000  |
| 6        | -3.426145000 | 0.402498000  | 0.061437000  |
| 8        | -4.202683000 | -0.540489000 | 0.003011000  |
| 1        | -3.797431000 | 1.456063000  | 0.148155000  |

E = -611.012413 au    ZPVE = 0.175732637 au     $\nu_i = 419.87i \text{ cm}^{-1}$

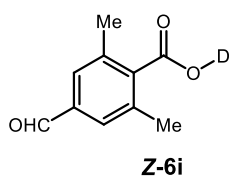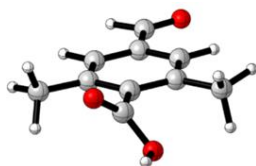

|          |              |              |              |
|----------|--------------|--------------|--------------|
| 6        | -1.133889000 | 1.411542000  | 0.091177000  |
| 6        | 0.267608000  | 1.306140000  | 0.058775000  |
| 6        | 0.838967000  | 0.008526000  | -0.014069000 |
| 6        | 0.032304000  | -1.160044000 | -0.088320000 |
| 6        | -1.362582000 | -1.005164000 | -0.074906000 |
| 6        | -1.948676000 | 0.269344000  | 0.021482000  |
| 1        | -1.598162000 | 2.403271000  | 0.163397000  |
| 1        | -2.020893000 | -1.878109000 | -0.141834000 |
| 6        | 2.334809000  | -0.091934000 | -0.059984000 |
| 8        | 3.060053000  | 0.582834000  | -0.767306000 |
| 8        | 2.814290000  | -1.020496000 | 0.806462000  |
| 1(iso=2) | 3.780810000  | -1.002931000 | 0.672122000  |
| 6        | 0.620004000  | -2.551246000 | -0.195380000 |
| 1        | 1.426563000  | -2.596078000 | -0.944831000 |
| 1        | 1.048876000  | -2.876123000 | 0.765306000  |
| 1        | -0.163703000 | -3.266014000 | -0.490922000 |
| 6        | 1.115229000  | 2.558476000  | 0.105179000  |
| 1        | 1.902392000  | 2.488840000  | 0.873542000  |
| 1        | 1.622626000  | 2.725253000  | -0.857357000 |
| 1        | 0.485871000  | 3.432563000  | 0.334227000  |
| 6        | -3.431060000 | 0.404909000  | 0.044327000  |
| 8        | -4.209316000 | -0.536528000 | -0.017626000 |
| 1        | -3.800887000 | 1.459539000  | 0.124423000  |

E = -611.033372 au      ZPVE = 0.177138343 au

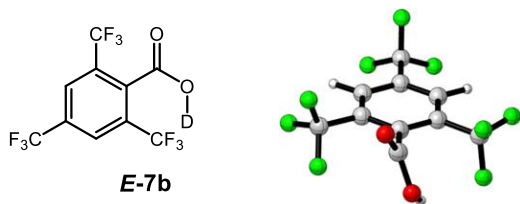

|          |              |              |              |
|----------|--------------|--------------|--------------|
| 6        | 1.171649000  | 1.195615000  | -0.058017000 |
| 6        | -0.229597000 | 1.217304000  | -0.021983000 |
| 6        | -0.972773000 | 0.015778000  | 0.018378000  |
| 6        | -0.265236000 | -1.208036000 | 0.037892000  |
| 6        | 1.137172000  | -1.233697000 | 0.020480000  |
| 6        | 1.850650000  | -0.029476000 | -0.017796000 |
| 1        | 1.730066000  | 2.131831000  | -0.117967000 |
| 1        | 1.666834000  | -2.187961000 | 0.039232000  |
| 6        | -2.485788000 | 0.072266000  | 0.172391000  |
| 8        | -3.008994000 | 0.545498000  | 1.151775000  |
| 8        | -3.203143000 | -0.432449000 | -0.854590000 |
| 1(iso=2) | -2.592244000 | -0.765543000 | -1.530296000 |
| 6        | -1.008584000 | -2.526066000 | 0.022887000  |
| 6        | -0.927812000 | 2.563922000  | -0.062157000 |
| 6        | 3.359165000  | -0.048268000 | 0.014050000  |
| 9        | 3.848911000  | -1.178344000 | -0.527791000 |
| 9        | 3.810968000  | 0.023544000  | 1.279557000  |

|   |              |              |              |
|---|--------------|--------------|--------------|
| 9 | 3.876741000  | 0.993943000  | -0.660911000 |
| 9 | -1.321468000 | 2.953254000  | 1.155929000  |
| 9 | -0.104497000 | 3.515667000  | -0.545922000 |
| 9 | -2.009046000 | 2.525174000  | -0.864275000 |
| 9 | -1.536607000 | -2.750031000 | -1.208058000 |
| 9 | -2.018364000 | -2.544728000 | 0.904297000  |
| 9 | -0.200040000 | -3.560565000 | 0.297708000  |

E = -1428.54178 au    ZPVE = 0.126805418 au

**TS-7b**

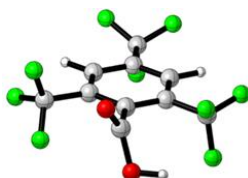

|          |              |              |              |
|----------|--------------|--------------|--------------|
| 6        | -1.179372000 | -1.196831000 | -0.004325000 |
| 6        | 0.222664000  | -1.221752000 | 0.003228000  |
| 6        | 0.970242000  | -0.023889000 | 0.028429000  |
| 6        | 0.265413000  | 1.200223000  | 0.058385000  |
| 6        | -1.136334000 | 1.231359000  | 0.072978000  |
| 6        | -1.854453000 | 0.029711000  | 0.037287000  |
| 1        | -1.740718000 | -2.132626000 | -0.036635000 |
| 1        | -1.662670000 | 2.186753000  | 0.120370000  |
| 6        | 2.486494000  | -0.072503000 | 0.096882000  |
| 8        | 3.070895000  | -0.550592000 | 1.036179000  |
| 8        | 3.105858000  | 0.384928000  | -1.041960000 |
| 1(iso=2) | 3.223262000  | 1.344881000  | -0.970805000 |
| 6        | 1.005169000  | 2.516912000  | 0.052055000  |
| 6        | 0.917555000  | -2.569502000 | -0.029093000 |
| 6        | -3.361946000 | 0.058364000  | -0.008054000 |
| 9        | -3.852116000 | 1.141304000  | 0.622594000  |
| 9        | -3.892492000 | -1.034392000 | 0.569255000  |
| 9        | -3.801403000 | 0.097854000  | -1.280186000 |
| 9        | 1.343910000  | -2.931560000 | 1.188982000  |
| 9        | 0.082182000  | -3.531787000 | -0.467529000 |
| 9        | 1.978309000  | -2.549659000 | -0.856703000 |
| 9        | 1.430214000  | 2.830239000  | -1.193934000 |
| 9        | 2.108512000  | 2.472240000  | 0.833670000  |
| 9        | 0.242162000  | 3.529512000  | 0.482372000  |

E = -1428.529096 au    ZPVE = 0.125393211 au     $\nu_i = 418.29i \text{ cm}^{-1}$

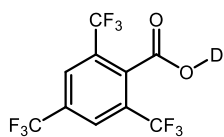

**Z-7b**

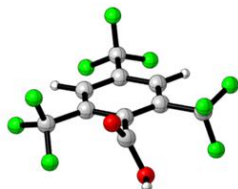

|          |              |              |              |
|----------|--------------|--------------|--------------|
| 6        | 1.167264000  | 1.208636000  | -0.052467000 |
| 6        | -0.234029000 | 1.222657000  | -0.016427000 |
| 6        | -0.968024000 | 0.016769000  | 0.015780000  |
| 6        | -0.261745000 | -1.205475000 | 0.025201000  |
| 6        | 1.141148000  | -1.221774000 | 0.006813000  |
| 6        | 1.849762000  | -0.014703000 | -0.029744000 |
| 1        | 1.721744000  | 2.147543000  | -0.103628000 |
| 1        | 1.675967000  | -2.173284000 | 0.022060000  |
| 6        | -2.475915000 | 0.054188000  | 0.103645000  |
| 8        | -3.088758000 | 0.509600000  | 1.043872000  |
| 8        | -3.031210000 | -0.480754000 | -1.001998000 |
| 1(iso=2) | -3.994476000 | -0.447419000 | -0.848247000 |
| 6        | -0.985424000 | -2.537234000 | 0.035770000  |
| 6        | -0.941041000 | 2.563749000  | -0.032273000 |
| 6        | 3.357924000  | -0.027864000 | -0.003140000 |
| 9        | 3.851723000  | -1.150682000 | -0.556158000 |
| 9        | 3.814834000  | 0.034752000  | 1.261857000  |
| 9        | 3.870179000  | 1.022739000  | -0.669857000 |
| 9        | -1.362690000 | 2.912185000  | 1.191099000  |
| 9        | -0.119274000 | 3.538131000  | -0.469385000 |
| 9        | -2.009601000 | 2.544216000  | -0.852891000 |
| 9        | -1.375782000 | -2.892780000 | -1.198520000 |
| 9        | -2.077096000 | -2.504268000 | 0.823547000  |
| 9        | -0.185960000 | -3.516659000 | 0.500960000  |

E = -1428.548931 au      ZPVE = 0.126957578 au

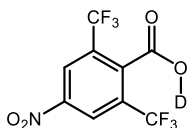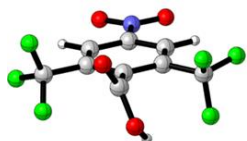

**E-7c**

|          |              |              |              |
|----------|--------------|--------------|--------------|
| 6        | -1.486159000 | 1.132762000  | 0.029138000  |
| 6        | -0.086812000 | 1.212556000  | 0.012327000  |
| 6        | 0.711343000  | 0.045753000  | -0.015754000 |
| 6        | 0.061670000  | -1.210223000 | -0.044249000 |
| 6        | -1.337240000 | -1.306939000 | -0.046770000 |
| 1        | -2.107799000 | 2.027983000  | 0.072073000  |
| 1        | -1.843742000 | -2.272288000 | -0.078721000 |
| 6        | 2.221543000  | 0.172181000  | -0.157615000 |
| 8        | 2.728103000  | 0.668849000  | -1.134321000 |
| 8        | 2.954210000  | -0.298291000 | 0.874069000  |
| 1(iso=2) | 2.355581000  | -0.658192000 | 1.547084000  |
| 6        | 0.548061000  | 2.591883000  | 0.053926000  |
| 6        | 0.866133000  | -2.493751000 | -0.024445000 |
| 6        | -2.083281000 | -0.128188000 | -0.015957000 |
| 7        | -3.565460000 | -0.220148000 | -0.014739000 |
| 8        | -4.053181000 | -1.349880000 | -0.057527000 |
| 8        | -4.189153000 | 0.840430000  | 0.028672000  |
| 9        | 1.621932000  | 2.603576000  | 0.865939000  |

|   |              |              |              |
|---|--------------|--------------|--------------|
| 9 | 0.933458000  | 2.992493000  | -1.162443000 |
| 9 | -0.323339000 | 3.503758000  | 0.526684000  |
| 9 | 0.108636000  | -3.563008000 | -0.305410000 |
| 9 | 1.393735000  | -2.690168000 | 1.210571000  |
| 9 | 1.881445000  | -2.462377000 | -0.898452000 |

E = -1296.253682 au    ZPVE = 0.124399522 au

**TS-7c**

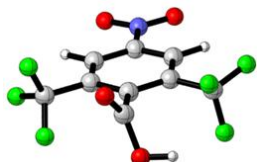

|          |              |              |              |
|----------|--------------|--------------|--------------|
| 6        | -1.511935000 | -1.106188000 | -0.031121000 |
| 6        | -0.114118000 | -1.212694000 | -0.005163000 |
| 6        | 0.706620000  | -0.063214000 | 0.027381000  |
| 6        | 0.080224000  | 1.203380000  | 0.046453000  |
| 6        | -1.315982000 | 1.328947000  | 0.043497000  |
| 1        | -2.149826000 | -1.989727000 | -0.076426000 |
| 1        | -1.803586000 | 2.304193000  | 0.074279000  |
| 6        | 2.216059000  | -0.207810000 | 0.115036000  |
| 8        | 2.755332000  | -0.717981000 | 1.064529000  |
| 8        | 2.877544000  | 0.201938000  | -1.017375000 |
| 1(iso=2) | 3.054730000  | 1.153131000  | -0.951678000 |
| 6        | 0.496199000  | -2.602668000 | -0.032785000 |
| 6        | 0.902353000  | 2.472172000  | 0.040390000  |
| 6        | -2.085157000 | 0.165497000  | 0.004950000  |
| 7        | -3.564828000 | 0.286842000  | -0.005965000 |
| 8        | -4.030572000 | 1.425871000  | 0.036017000  |
| 8        | -4.209625000 | -0.760665000 | -0.055706000 |
| 9        | 1.564971000  | -2.645552000 | -0.848472000 |
| 9        | 0.885075000  | -2.988524000 | 1.189840000  |
| 9        | -0.392428000 | -3.508832000 | -0.481895000 |
| 9        | 0.199526000  | 3.532336000  | 0.454574000  |
| 9        | 1.359748000  | 2.745856000  | -1.202733000 |
| 9        | 1.990381000  | 2.361012000  | 0.835800000  |

E = -1296.241082 au    ZPVE = 0.125393211 au     $\nu_i = 418.36i \text{ cm}^{-1}$

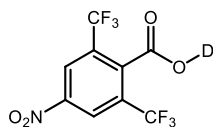

**Z-7c**

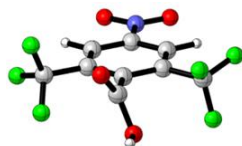

|   |              |              |              |
|---|--------------|--------------|--------------|
| 6 | -1.456402000 | 1.180005000  | 0.026028000  |
| 6 | -0.055408000 | 1.221145000  | 0.007312000  |
| 6 | 0.707521000  | 0.032566000  | -0.014612000 |
| 6 | 0.031319000  | -1.207184000 | -0.032001000 |



|          |              |              |              |
|----------|--------------|--------------|--------------|
| 6        | -1.370298000 | -1.263502000 | -0.031292000 |
| 1        | -2.053937000 | 2.091540000  | 0.061830000  |
| 1        | -1.903044000 | -2.214728000 | -0.059305000 |
| 6        | 2.215095000  | 0.106180000  | -0.088287000 |
| 8        | 2.824477000  | 0.579230000  | -1.022093000 |
| 8        | 2.772028000  | -0.418930000 | 1.020741000  |
| 1(iso=2) | 3.735904000  | -0.362653000 | 0.877605000  |
| 6        | 0.619041000  | 2.580690000  | 0.024237000  |
| 6        | 0.787790000  | -2.522567000 | -0.039318000 |
| 6        | -2.085181000 | -0.065791000 | -0.000290000 |
| 7        | -3.569284000 | -0.118655000 | 0.008324000  |
| 8        | -4.087947000 | -1.234919000 | -0.021328000 |
| 8        | -4.165408000 | 0.958056000  | 0.044328000  |
| 9        | 1.678740000  | 2.588174000  | 0.855636000  |
| 9        | 1.043224000  | 2.931580000  | -1.196812000 |
| 9        | -0.230908000 | 3.534499000  | 0.448959000  |
| 9        | 0.015595000  | -3.518629000 | -0.511439000 |
| 9        | 1.176528000  | -2.866937000 | 1.197862000  |
| 9        | 1.883490000  | -2.459833000 | -0.818899000 |

E = -1296.261004 au      ZPVE = 0.124576016 au

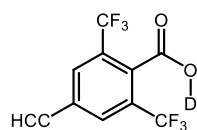

**E-7e**

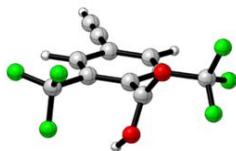

|          |              |              |              |
|----------|--------------|--------------|--------------|
| 6        | -1.282826000 | 1.610270000  | 0.028149000  |
| 6        | -1.224262000 | 0.210585000  | 0.011040000  |
| 6        | 0.016751000  | -0.466695000 | -0.018732000 |
| 6        | 1.198158000  | 0.311159000  | -0.047896000 |
| 6        | 1.145416000  | 1.711959000  | -0.049797000 |
| 6        | -0.098329000 | 2.375086000  | -0.017221000 |
| 1        | -2.249614000 | 2.116686000  | 0.073233000  |
| 1        | 2.068139000  | 2.295423000  | -0.083736000 |
| 6        | 0.046102000  | -1.981135000 | -0.151884000 |
| 8        | -0.404128000 | -2.549622000 | -1.117131000 |
| 8        | 0.601246000  | -2.652646000 | 0.881692000  |
| 1(iso=2) | 0.902238000  | -2.011097000 | 1.543819000  |
| 6        | 2.556039000  | -0.354842000 | -0.031991000 |
| 6        | -2.529497000 | -0.560593000 | 0.054493000  |
| 6        | -0.157680000 | 3.811432000  | -0.017904000 |
| 6        | -0.209363000 | 5.044673000  | -0.019028000 |
| 1        | -0.254859000 | 6.120377000  | -0.020907000 |
| 9        | -3.530406000 | 0.212534000  | 0.523810000  |
| 9        | -2.892943000 | -0.991883000 | -1.159729000 |
| 9        | -2.436193000 | -1.628546000 | 0.870858000  |
| 9        | 3.543609000  | 0.506006000  | -0.323157000 |

|   |             |              |              |
|---|-------------|--------------|--------------|
| 9 | 2.819004000 | -0.854590000 | 1.204091000  |
| 9 | 2.629606000 | -1.374039000 | -0.900791000 |

E = -1168.153744 au      ZPVE = 0.129923825 au

TS-7e

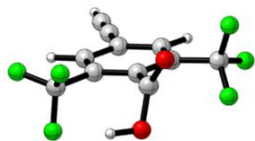

|          |              |              |              |
|----------|--------------|--------------|--------------|
| 6        | 1.314876000  | 1.590484000  | -0.033571000 |
| 6        | 1.230820000  | 0.191927000  | -0.006548000 |
| 6        | -0.020678000 | -0.463566000 | 0.027366000  |
| 6        | -1.186014000 | 0.336552000  | 0.047064000  |
| 6        | -1.109980000 | 1.735884000  | 0.043533000  |
| 6        | 0.144926000  | 2.377007000  | 0.003025000  |
| 1        | 2.290895000  | 2.078520000  | -0.081478000 |
| 1        | -2.022487000 | 2.335688000  | 0.076569000  |
| 6        | -0.087962000 | -1.976657000 | 0.114709000  |
| 8        | 0.358395000  | -2.587847000 | 1.053055000  |
| 8        | -0.610500000 | -2.575394000 | -1.008842000 |
| 1(iso=2) | -1.575068000 | -2.615183000 | -0.919793000 |
| 6        | -2.556208000 | -0.296657000 | 0.044215000  |
| 6        | 2.520903000  | -0.603914000 | -0.037481000 |
| 6        | 0.229610000  | 3.812259000  | -0.006979000 |
| 6        | 0.302551000  | 5.044348000  | -0.015159000 |
| 1        | 0.366965000  | 6.118994000  | -0.022177000 |
| 9        | 2.857146000  | -1.046482000 | 1.183018000  |
| 9        | 2.418257000  | -1.668678000 | -0.854959000 |
| 9        | 3.544679000  | 0.149252000  | -0.487719000 |
| 9        | -2.599751000 | -1.397377000 | 0.832050000  |
| 9        | -3.507487000 | 0.543999000  | 0.472078000  |
| 9        | -2.906237000 | -0.702725000 | -1.198676000 |

E = -1168.140605 au      ZPVE = 0.128616861 au       $\nu_i = 416.70i \text{ cm}^{-1}$

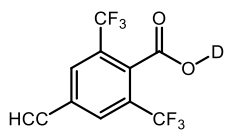

Z-7e

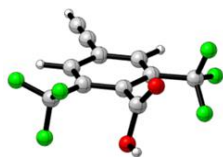

|   |              |              |              |
|---|--------------|--------------|--------------|
| 6 | -1.257561000 | 1.637629000  | 0.028772000  |
| 6 | -1.226788000 | 0.237090000  | 0.008315000  |
| 6 | 0.000850000  | -0.461779000 | -0.014901000 |
| 6 | 1.200008000  | 0.284737000  | -0.032129000 |
| 6 | 1.173386000  | 1.686558000  | -0.030043000 |
| 6 | -0.056048000 | 2.375736000  | 0.002765000  |
| 1 | -2.213712000 | 2.164189000  | 0.066232000  |
| 1 | 2.107618000  | 2.251772000  | -0.059461000 |

```

6   0.010875000  -1.969523000  -0.086331000
8   -0.433506000  -2.610628000  -1.013438000
8   0.574602000  -2.497185000   1.019913000
1(iso=2)  0.571633000  -3.461908000   0.872433000
6   2.553266000  -0.396405000  -0.043045000
6  -2.545124000  -0.509964000   0.026079000
6  -0.084574000   3.813437000   0.011851000
6  -0.109415000   5.047493000   0.019489000
1  -0.131148000   6.123803000   0.025588000
9  -3.548352000   0.284056000   0.451494000
9  -2.878292000  -0.955382000  -1.193940000
9  -2.497789000  -1.569961000   0.857759000
9   3.507700000   0.427514000  -0.519359000
9   2.928650000  -0.766397000   1.192465000
9   2.552926000  -1.495986000  -0.821920000

```

E = -1168.160489 au      ZPVE = 0.130066853 au

## 2. Tunneling Computations

Computational tunneling half-lives were determined at the CVT/SCT//MP2/cc-pVDZ level of theory using Polyrate Version 2017-c.<sup>3</sup>

**Table S2.1.** Computed half-lives from reactions of  $E \rightarrow Z$  isomerization for selected protium carboxylic acids (ArCOOH). (CVT/SCT//MP2/cc-pVDZ).

| Compound | R= | X= | $t_{1/2(\text{comp})}$ (min) |
|----------|----|----|------------------------------|
| 1a       | H  | H  | $2.0 \times 10^{-6}$         |
| 1f       | H  | CN | $1.3 \times 10^{-7}$         |

|    |                 |    |                      |
|----|-----------------|----|----------------------|
| 2a | Me              | H  | $4.9 \times 10^{-2}$ |
| 2e | Me              | Cl | $2.1 \times 10^{-2}$ |
| 2f | Me              | CN | $4.7 \times 10^{-3}$ |
| 4a | CF <sub>3</sub> | H  | $1.3 \times 10^{-3}$ |
| 4d | CF <sub>3</sub> | CN | $7.5 \times 10^{-4}$ |

**Table S2.2.** Rate constants of the isomerization reaction **E-1a**  $\rightarrow$  **Z-1a** in  $s^{-1}$  computed at the CVT/SCT//MP2/cc-pVDZ level of theory using polyrate.

| T (K)  | TST      | CVT      | CVT/ZCT  | CVT/SCT  |
|--------|----------|----------|----------|----------|
| 0.10   | NaN      | NaN      | NaN      | NaN      |
| 1.00   | NaN      | NaN      | NaN      | NaN      |
| 5.00   | 3.82-207 | 3.81-207 | 1.83E+02 | 5.86E+03 |
| 10.00  | 3.99E-98 | 3.99E-98 | 1.83E+02 | 5.86E+03 |
| 11.00  | 3.36E-88 | 3.36E-88 | 1.83E+02 | 5.86E+03 |
| 15.00  | 1.04E-61 | 1.04E-61 | 1.83E+02 | 5.86E+03 |
| 20.00  | 1.82E-43 | 1.82E-43 | 1.83E+02 | 5.85E+03 |
| 25.00  | 1.69E-32 | 1.69E-32 | 1.83E+02 | 5.83E+03 |
| 30.00  | 3.58E-25 | 3.58E-25 | 1.82E+02 | 5.81E+03 |
| 35.00  | 6.26E-20 | 6.26E-20 | 1.81E+02 | 5.79E+03 |
| 40.00  | 5.44E-16 | 5.44E-16 | 1.80E+02 | 5.76E+03 |
| 45.00  | 6.38E-13 | 6.38E-13 | 1.80E+02 | 5.74E+03 |
| 50.00  | 1.84E-10 | 1.84E-10 | 1.80E+02 | 5.72E+03 |
| 60.00  | 9.20E-07 | 9.20E-07 | 1.86E+02 | 5.76E+03 |
| 70.00  | 4.13E-04 | 4.13E-04 | 2.26E+02 | 6.15E+03 |
| 80.00  | 4.09E-02 | 4.09E-02 | 3.71E+02 | 7.56E+03 |
| 90.00  | 1.48E+00 | 1.48E+00 | 8.30E+02 | 1.14E+04 |
| 100.00 | 2.64E+01 | 2.63E+01 | 2.34E+03 | 2.11E+04 |
| 110.00 | 2.80E+02 | 2.80E+02 | 7.54E+03 | 4.53E+04 |
| 120.00 | 2.02E+03 | 2.02E+03 | 2.52E+04 | 1.07E+05 |
| 130.00 | 1.08E+04 | 1.08E+04 | 8.04E+04 | 2.63E+05 |
| 140.00 | 4.59E+04 | 4.59E+04 | 2.35E+05 | 6.39E+05 |
| 150.00 | 1.61E+05 | 1.61E+05 | 6.27E+05 | 1.49E+06 |
| 160.00 | 4.83E+05 | 4.83E+05 | 1.52E+06 | 3.26E+06 |
| 170.00 | 1.28E+06 | 1.28E+06 | 3.40E+06 | 6.74E+06 |
| 180.00 | 3.05E+06 | 3.05E+06 | 7.04E+06 | 1.31E+07 |
| 190.00 | 6.63E+06 | 6.63E+06 | 1.37E+07 | 2.42E+07 |
| 200.00 | 1.34E+07 | 1.34E+07 | 2.51E+07 | 4.24E+07 |
| 220.00 | 4.52E+07 | 4.52E+07 | 7.29E+07 | 1.15E+08 |
| 240.00 | 1.25E+08 | 1.25E+08 | 1.81E+08 | 2.68E+08 |
| 260.00 | 2.97E+08 | 2.97E+08 | 3.96E+08 | 5.59E+08 |
| 280.00 | 6.25E+08 | 6.25E+08 | 7.84E+08 | 1.06E+09 |
| 298.00 | 1.12E+09 | 1.12E+09 | 1.35E+09 | 1.77E+09 |

**Table S2.3.** Rate constants of the isomerization reaction **E-1f**  $\rightarrow$  **Z-1f** in  $s^{-1}$  computed at the CVT/SCT//MP2/cc-pVDZ level of theory using polyrate.

| T (K) | TST      | CVT      | CVT/ZCT  | CVT/SCT  |
|-------|----------|----------|----------|----------|
| 0.10  | NaN      | NaN      | NaN      | NaN      |
| 1.00  | NaN      | NaN      | NaN      | NaN      |
| 5.00  | 3.00-185 | 3.00-185 | 4.44E+03 | 8.95E+04 |
| 10.00 | 3.54E-87 | 3.54E-87 | 4.44E+03 | 8.95E+04 |
| 11.00 | 3.01E-78 | 3.01E-78 | 4.44E+03 | 8.95E+04 |

|        |          |          |          |          |
|--------|----------|----------|----------|----------|
| 15.00  | 2.07E-54 | 2.07E-54 | 4.44E+03 | 8.94E+04 |
| 20.00  | 5.43E-38 | 5.43E-38 | 4.43E+03 | 8.93E+04 |
| 25.00  | 4.05E-28 | 4.05E-28 | 4.41E+03 | 8.89E+04 |
| 30.00  | 1.59E-21 | 1.59E-21 | 4.39E+03 | 8.85E+04 |
| 35.00  | 8.37E-17 | 8.37E-17 | 4.37E+03 | 8.80E+04 |
| 40.00  | 2.95E-13 | 2.95E-13 | 4.34E+03 | 8.75E+04 |
| 45.00  | 1.72E-10 | 1.72E-10 | 4.32E+03 | 8.71E+04 |
| 50.00  | 2.83E-08 | 2.83E-08 | 4.31E+03 | 8.67E+04 |
| 60.00  | 6.09E-05 | 6.09E-05 | 4.36E+03 | 8.67E+04 |
| 70.00  | 1.50E-02 | 1.50E-02 | 4.79E+03 | 8.99E+04 |
| 80.00  | 9.46E-01 | 9.46E-01 | 6.32E+03 | 1.02E+05 |
| 90.00  | 2.41E+01 | 2.41E+01 | 1.09E+04 | 1.33E+05 |
| 100.00 | 3.24E+02 | 3.24E+02 | 2.48E+04 | 2.08E+05 |
| 110.00 | 2.74E+03 | 2.74E+03 | 6.83E+04 | 3.82E+05 |
| 120.00 | 1.63E+04 | 1.63E+04 | 2.02E+05 | 7.86E+05 |
| 130.00 | 7.43E+04 | 7.43E+04 | 5.87E+05 | 1.71E+06 |
| 140.00 | 2.74E+05 | 2.74E+05 | 1.59E+06 | 3.75E+06 |
| 150.00 | 8.50E+05 | 8.50E+05 | 3.94E+06 | 8.01E+06 |
| 160.00 | 2.30E+06 | 2.30E+06 | 8.97E+06 | 1.64E+07 |
| 170.00 | 5.54E+06 | 5.54E+06 | 1.89E+07 | 3.18E+07 |
| 180.00 | 1.22E+07 | 1.21E+07 | 3.70E+07 | 5.88E+07 |
| 190.00 | 2.46E+07 | 2.46E+07 | 6.80E+07 | 1.03E+08 |
| 200.00 | 4.64E+07 | 4.64E+07 | 1.18E+08 | 1.73E+08 |
| 220.00 | 1.39E+08 | 1.39E+08 | 3.13E+08 | 4.33E+08 |
| 240.00 | 3.51E+08 | 3.51E+08 | 7.09E+08 | 9.46E+08 |
| 260.00 | 7.67E+08 | 7.67E+08 | 1.43E+09 | 1.85E+09 |
| 280.00 | 1.51E+09 | 1.51E+09 | 2.62E+09 | 3.32E+09 |
| 298.00 | 2.56E+09 | 2.56E+09 | 4.24E+09 | 5.26E+09 |

**Table S2.4.** Rate constants of the isomerization reaction **E-2a**  $\rightarrow$  **Z-2a** in s<sup>-1</sup> computed at the CVT/SCT//MP2/cc-pVDZ level of theory using polyrate.

| T (K)  | TST      | CVT      | CVT/ZCT  | CVT/SCT  |
|--------|----------|----------|----------|----------|
| 0.10   | NaN      | NaN      | NaN      | NaN      |
| 1.00   | NaN      | NaN      | NaN      | NaN      |
| 5.00   | 0.00E+00 | 0.00E+00 | NaN      | NaN      |
| 10.00  | 4.13-156 | 2.47-156 | 2.32E-03 | 2.33E-01 |
| 11.00  | 6.49-141 | 3.89-141 | 2.35E-03 | 2.36E-01 |
| 15.00  | 2.27-100 | 1.38-100 | 2.45E-03 | 2.46E-01 |
| 20.00  | 1.80E-72 | 1.11E-72 | 2.50E-03 | 2.52E-01 |
| 25.00  | 1.02E-55 | 6.40E-56 | 2.50E-03 | 2.51E-01 |
| 30.00  | 1.52E-44 | 9.71E-45 | 2.46E-03 | 2.47E-01 |
| 35.00  | 1.47E-36 | 9.50E-37 | 2.40E-03 | 2.41E-01 |
| 40.00  | 1.44E-30 | 9.39E-31 | 2.32E-03 | 2.33E-01 |
| 45.00  | 6.55E-26 | 4.33E-26 | 2.23E-03 | 2.25E-01 |
| 50.00  | 3.49E-22 | 2.33E-22 | 2.15E-03 | 2.16E-01 |
| 60.00  | 1.35E-16 | 9.16E-17 | 2.01E-03 | 1.99E-01 |
| 70.00  | 1.32E-12 | 9.05E-13 | 2.11E-03 | 1.89E-01 |
| 80.00  | 1.28E-09 | 8.92E-10 | 2.89E-03 | 1.98E-01 |
| 90.00  | 2.69E-07 | 1.89E-07 | 5.65E-03 | 2.51E-01 |
| 100.00 | 1.93E-05 | 1.37E-05 | 1.52E-02 | 4.02E-01 |
| 110.00 | 6.34E-04 | 4.54E-04 | 5.47E-02 | 8.19E-01 |
| 120.00 | 1.16E-02 | 8.37E-03 | 2.38E-01 | 2.07E+00 |
| 130.00 | 1.35E-01 | 9.83E-02 | 1.09E+00 | 6.10E+00 |
| 140.00 | 1.11E+00 | 8.12E-01 | 4.71E+00 | 1.93E+01 |
| 150.00 | 6.86E+00 | 5.05E+00 | 1.84E+01 | 6.02E+01 |
| 160.00 | 3.37E+01 | 2.49E+01 | 6.44E+01 | 1.78E+02 |
| 170.00 | 1.37E+02 | 1.02E+02 | 2.03E+02 | 4.90E+02 |
| 180.00 | 4.77E+02 | 3.56E+02 | 5.85E+02 | 1.25E+03 |
| 190.00 | 1.45E+03 | 1.09E+03 | 1.54E+03 | 2.99E+03 |

|        |          |          |          |          |
|--------|----------|----------|----------|----------|
| 200.00 | 3.95E+03 | 2.98E+03 | 3.77E+03 | 6.69E+03 |
| 220.00 | 2.22E+04 | 1.69E+04 | 1.83E+04 | 2.82E+04 |
| 240.00 | 9.32E+04 | 7.13E+04 | 7.09E+04 | 9.76E+04 |
| 260.00 | 3.13E+05 | 2.41E+05 | 2.27E+05 | 2.88E+05 |
| 280.00 | 8.80E+05 | 6.82E+05 | 6.21E+05 | 7.45E+05 |
| 298.00 | 1.98E+06 | 1.54E+06 | 1.38E+06 | 1.59E+06 |

**Table S2.5.** Rate constants of the isomerization reaction  $E-2e \rightarrow Z-2e$  in  $s^{-1}$  computed at the CVT/SCT//MP2/cc-pVDZ level of theory using polyrate.

| T (K)  | TST      | CVT      | CVT/ZCT  | CVT/SCT  |
|--------|----------|----------|----------|----------|
| 0.10   | NaN      | NaN      | NaN      | NaN      |
| 1.00   | NaN      | NaN      | NaN      | NaN      |
| 5.00   | 0.00E+00 | 0.00E+00 | NaN      | NaN      |
| 10.00  | 1.07-149 | 7.07-150 | 4.34E-03 | 5.30E-01 |
| 11.00  | 4.41-135 | 2.90-135 | 4.38E-03 | 5.36E-01 |
| 15.00  | 4.31E-96 | 2.85E-96 | 4.52E-03 | 5.53E-01 |
| 20.00  | 2.92E-69 | 1.95E-69 | 4.58E-03 | 5.61E-01 |
| 25.00  | 3.78E-53 | 2.56E-53 | 4.56E-03 | 5.57E-01 |
| 30.00  | 2.12E-42 | 1.45E-42 | 4.47E-03 | 5.47E-01 |
| 35.00  | 1.01E-34 | 6.98E-35 | 4.34E-03 | 5.31E-01 |
| 40.00  | 5.85E-29 | 4.07E-29 | 4.19E-03 | 5.13E-01 |
| 45.00  | 1.77E-24 | 1.24E-24 | 4.03E-03 | 4.93E-01 |
| 50.00  | 6.81E-21 | 4.80E-21 | 3.88E-03 | 4.72E-01 |
| 60.00  | 1.61E-15 | 1.15E-15 | 3.72E-03 | 4.35E-01 |
| 70.00  | 1.11E-11 | 7.97E-12 | 4.37E-03 | 4.20E-01 |
| 80.00  | 8.27E-09 | 6.01E-09 | 7.52E-03 | 4.66E-01 |
| 90.00  | 1.41E-06 | 1.04E-06 | 1.78E-02 | 6.47E-01 |
| 100.00 | 8.60E-05 | 6.35E-05 | 5.21E-02 | 1.14E+00 |
| 110.00 | 2.47E-03 | 1.83E-03 | 1.90E-01 | 2.45E+00 |
| 120.00 | 4.04E-02 | 3.02E-02 | 8.22E-01 | 6.29E+00 |
| 130.00 | 4.29E-01 | 3.22E-01 | 3.71E+00 | 1.85E+01 |
| 140.00 | 3.24E+00 | 2.44E+00 | 1.58E+01 | 5.76E+01 |
| 150.00 | 1.86E+01 | 1.41E+01 | 6.01E+01 | 1.77E+02 |
| 160.00 | 8.61E+01 | 6.55E+01 | 2.04E+02 | 5.18E+02 |
| 170.00 | 3.31E+02 | 2.53E+02 | 6.21E+02 | 1.40E+03 |
| 180.00 | 1.10E+03 | 8.41E+02 | 1.71E+03 | 3.52E+03 |
| 190.00 | 3.20E+03 | 2.46E+03 | 4.32E+03 | 8.21E+03 |
| 200.00 | 8.36E+03 | 6.46E+03 | 1.01E+04 | 1.79E+04 |
| 220.00 | 4.39E+04 | 3.41E+04 | 4.47E+04 | 7.10E+04 |
| 240.00 | 1.74E+05 | 1.36E+05 | 1.59E+05 | 2.31E+05 |
| 260.00 | 5.56E+05 | 4.37E+05 | 4.74E+05 | 6.43E+05 |
| 280.00 | 1.50E+06 | 1.19E+06 | 1.22E+06 | 1.57E+06 |
| 298.00 | 3.27E+06 | 2.59E+06 | 2.58E+06 | 3.18E+06 |

**Table S2.6.** Rate constants of the isomerization reaction  $E-2f \rightarrow Z-2f$  in  $s^{-1}$  computed at the CVT/SCT//MP2/cc-pVDZ level of theory using polyrate.

| T (K) | TST      | CVT      | CVT/ZCT  | CVT/SCT  |
|-------|----------|----------|----------|----------|
| 0.10  | NaN      | NaN      | NaN      | NaN      |
| 1.00  | NaN      | NaN      | NaN      | NaN      |
| 5.00  | 0.00E+00 | 0.00E+00 | NaN      | NaN      |
| 10.00 | 7.22-148 | 1.32-148 | 4.13E-02 | 2.40E+00 |
| 11.00 | 2.02-133 | 4.25-134 | 4.22E-02 | 2.45E+00 |
| 15.00 | 7.05E-95 | 2.16E-95 | 4.42E-02 | 2.57E+00 |
| 20.00 | 2.34E-68 | 9.17E-69 | 4.47E-02 | 2.60E+00 |

|        |          |          |          |          |
|--------|----------|----------|----------|----------|
| 25.00  | 1.96E-52 | 8.88E-53 | 4.41E-02 | 2.56E+00 |
| 30.00  | 8.20E-42 | 4.08E-42 | 4.27E-02 | 2.48E+00 |
| 35.00  | 3.18E-34 | 1.69E-34 | 4.11E-02 | 2.39E+00 |
| 40.00  | 1.56E-28 | 8.74E-29 | 3.93E-02 | 2.28E+00 |
| 45.00  | 4.18E-24 | 2.43E-24 | 3.74E-02 | 2.17E+00 |
| 50.00  | 1.45E-20 | 8.69E-21 | 3.55E-02 | 2.06E+00 |
| 60.00  | 2.95E-15 | 1.85E-15 | 3.23E-02 | 1.86E+00 |
| 70.00  | 1.81E-11 | 1.18E-11 | 3.07E-02 | 1.72E+00 |
| 80.00  | 1.25E-08 | 8.31E-09 | 3.32E-02 | 1.67E+00 |
| 90.00  | 2.00E-06 | 1.36E-06 | 4.63E-02 | 1.84E+00 |
| 100.00 | 1.16E-04 | 7.99E-05 | 9.41E-02 | 2.44E+00 |
| 110.00 | 3.18E-03 | 2.23E-03 | 2.90E-01 | 4.15E+00 |
| 120.00 | 5.03E-02 | 3.56E-02 | 1.17E+00 | 9.27E+00 |
| 130.00 | 5.18E-01 | 3.71E-01 | 4.98E+00 | 2.54E+01 |
| 140.00 | 3.81E+00 | 2.76E+00 | 1.98E+01 | 7.58E+01 |
| 150.00 | 2.15E+01 | 1.56E+01 | 7.03E+01 | 2.24E+02 |
| 160.00 | 9.73E+01 | 7.14E+01 | 2.22E+02 | 6.24E+02 |
| 170.00 | 3.68E+02 | 2.72E+02 | 6.33E+02 | 1.61E+03 |
| 180.00 | 1.20E+03 | 8.92E+02 | 1.64E+03 | 3.85E+03 |
| 190.00 | 3.46E+03 | 2.58E+03 | 3.93E+03 | 8.57E+03 |
| 200.00 | 8.93E+03 | 6.70E+03 | 8.76E+03 | 1.79E+04 |
| 220.00 | 4.59E+04 | 3.47E+04 | 3.64E+04 | 6.58E+04 |
| 240.00 | 1.79E+05 | 1.36E+05 | 1.24E+05 | 2.02E+05 |
| 260.00 | 5.64E+05 | 4.33E+05 | 3.59E+05 | 5.36E+05 |
| 280.00 | 1.50E+06 | 1.16E+06 | 9.08E+05 | 1.26E+06 |
| 298.00 | 3.24E+06 | 2.51E+06 | 1.90E+06 | 2.50E+06 |

**Table S2.7.** Rate constants of the isomerization reaction **E-4a**  $\rightarrow$  **Z-4a** in  $s^{-1}$  computed at the CVT/SCT//MP2/cc-pVDZ level of theory using polyrate.

| T (K)  | TST      | CVT      | CVT/ZCT  | CVT/SCT  |
|--------|----------|----------|----------|----------|
| 0.10   | NaN      | NaN      | NaN      | NaN      |
| 1.00   | NaN      | NaN      | NaN      | NaN      |
| 5.00   | 1.56-295 | 1.55-295 | 1.81E-01 | 8.81E+00 |
| 10.00  | 2.55-142 | 2.52-142 | 1.81E-01 | 8.81E+00 |
| 11.00  | 2.23-128 | 2.21-128 | 1.81E-01 | 8.82E+00 |
| 15.00  | 3.59E-91 | 3.55E-91 | 1.82E-01 | 8.85E+00 |
| 20.00  | 1.47E-65 | 1.45E-65 | 1.83E-01 | 8.91E+00 |
| 25.00  | 3.62E-50 | 3.58E-50 | 1.84E-01 | 8.97E+00 |
| 30.00  | 6.81E-40 | 6.74E-40 | 1.85E-01 | 9.01E+00 |
| 35.00  | 1.52E-32 | 1.50E-32 | 1.85E-01 | 9.01E+00 |
| 40.00  | 5.00E-27 | 4.95E-27 | 1.84E-01 | 8.98E+00 |
| 45.00  | 9.89E-23 | 9.79E-23 | 1.83E-01 | 8.93E+00 |
| 50.00  | 2.72E-19 | 2.69E-19 | 1.82E-01 | 8.85E+00 |
| 60.00  | 3.98E-14 | 3.95E-14 | 1.80E-01 | 8.69E+00 |
| 70.00  | 1.97E-10 | 1.95E-10 | 1.86E-01 | 8.66E+00 |
| 80.00  | 1.17E-07 | 1.16E-07 | 2.21E-01 | 9.12E+00 |
| 90.00  | 1.69E-05 | 1.68E-05 | 3.36E-01 | 1.07E+01 |
| 100.00 | 9.05E-04 | 8.97E-04 | 7.20E-01 | 1.50E+01 |
| 110.00 | 2.35E-02 | 2.33E-02 | 2.20E+00 | 2.65E+01 |
| 120.00 | 3.56E-01 | 3.53E-01 | 8.48E+00 | 5.91E+01 |
| 130.00 | 3.54E+00 | 3.51E+00 | 3.49E+01 | 1.58E+02 |
| 140.00 | 2.54E+01 | 2.52E+01 | 1.37E+02 | 4.59E+02 |
| 150.00 | 1.40E+02 | 1.39E+02 | 4.90E+02 | 1.33E+03 |
| 160.00 | 6.24E+02 | 6.20E+02 | 1.59E+03 | 3.69E+03 |
| 170.00 | 2.33E+03 | 2.31E+03 | 4.67E+03 | 9.61E+03 |
| 180.00 | 7.52E+03 | 7.46E+03 | 1.26E+04 | 2.34E+04 |
| 190.00 | 2.14E+04 | 2.13E+04 | 3.11E+04 | 5.32E+04 |
| 200.00 | 5.49E+04 | 5.45E+04 | 7.17E+04 | 1.14E+05 |

|        |          |          |          |          |
|--------|----------|----------|----------|----------|
| 220.00 | 2.79E+05 | 2.77E+05 | 3.14E+05 | 4.45E+05 |
| 240.00 | 1.08E+06 | 1.07E+06 | 1.11E+06 | 1.44E+06 |
| 260.00 | 3.37E+06 | 3.34E+06 | 3.27E+06 | 4.00E+06 |
| 280.00 | 8.93E+06 | 8.87E+06 | 8.37E+06 | 9.78E+06 |
| 298.00 | 1.92E+07 | 1.90E+07 | 1.76E+07 | 1.99E+07 |

**Table S2.8.** Rate constants of the isomerization reaction *E-4d* → *Z-4d* in s<sup>-1</sup> computed at the CVT/SCT//MP2/cc-pVDZ level of theory using polyrate.

| T (K)  | TST      | CVT      | CVT/ZCT  | CVT/SCT  |
|--------|----------|----------|----------|----------|
| 0.10   | NaN      | NaN      | NaN      | NaN      |
| 1.00   | NaN      | NaN      | NaN      | NaN      |
| 5.00   | 1.27-287 | 1.26-287 | 2.99E-01 | 1.54E+01 |
| 10.00  | 2.30-138 | 2.30-138 | 2.99E-01 | 1.54E+01 |
| 11.00  | 8.81-125 | 8.80-125 | 2.99E-01 | 1.54E+01 |
| 15.00  | 1.55E-88 | 1.55E-88 | 2.99E-01 | 1.54E+01 |
| 20.00  | 1.40E-63 | 1.40E-63 | 3.01E-01 | 1.55E+01 |
| 25.00  | 1.38E-48 | 1.38E-48 | 3.02E-01 | 1.56E+01 |
| 30.00  | 1.42E-38 | 1.42E-38 | 3.03E-01 | 1.56E+01 |
| 35.00  | 2.05E-31 | 2.05E-31 | 3.03E-01 | 1.56E+01 |
| 40.00  | 4.86E-26 | 4.86E-26 | 3.02E-01 | 1.55E+01 |
| 45.00  | 7.46E-22 | 7.46E-22 | 3.00E-01 | 1.54E+01 |
| 50.00  | 1.68E-18 | 1.68E-18 | 2.97E-01 | 1.53E+01 |
| 60.00  | 1.81E-13 | 1.81E-13 | 2.93E-01 | 1.50E+01 |
| 70.00  | 7.22E-10 | 7.21E-10 | 3.02E-01 | 1.49E+01 |
| 80.00  | 3.64E-07 | 3.64E-07 | 3.54E-01 | 1.57E+01 |
| 90.00  | 4.63E-05 | 4.63E-05 | 5.54E-01 | 1.85E+01 |
| 100.00 | 2.24E-03 | 2.24E-03 | 1.35E+00 | 2.68E+01 |
| 110.00 | 5.36E-02 | 5.36E-02 | 4.87E+00 | 5.19E+01 |
| 120.00 | 7.57E-01 | 7.56E-01 | 2.07E+01 | 1.31E+02 |
| 130.00 | 7.11E+00 | 7.11E+00 | 8.69E+01 | 3.85E+02 |
| 140.00 | 4.85E+01 | 4.85E+01 | 3.34E+02 | 1.16E+03 |
| 150.00 | 2.56E+02 | 2.56E+02 | 1.15E+03 | 3.38E+03 |
| 160.00 | 1.10E+03 | 1.10E+03 | 3.56E+03 | 9.17E+03 |
| 170.00 | 3.96E+03 | 3.96E+03 | 9.98E+03 | 2.31E+04 |
| 180.00 | 1.24E+04 | 1.24E+04 | 2.56E+04 | 5.41E+04 |
| 190.00 | 3.44E+04 | 3.44E+04 | 6.06E+04 | 1.18E+05 |
| 200.00 | 8.61E+04 | 8.61E+04 | 1.34E+05 | 2.43E+05 |
| 220.00 | 4.19E+05 | 4.19E+05 | 5.43E+05 | 8.76E+05 |
| 240.00 | 1.56E+06 | 1.56E+06 | 1.80E+06 | 2.64E+06 |
| 260.00 | 4.75E+06 | 4.75E+06 | 5.06E+06 | 6.88E+06 |
| 280.00 | 1.23E+07 | 1.23E+07 | 1.24E+07 | 1.59E+07 |
| 298.00 | 2.58E+07 | 2.58E+07 | 2.53E+07 | 3.11E+07 |

**Table S2.9.** Computed half-lives from reactions of *E* → *Z* isomerization for selected deuterated carboxylic acids (ArCOOD). (CVT/SCT//MP2/cc-pVDZ).

| Compound | R= | X= | t <sub>1/2(comp)</sub> (min) |
|----------|----|----|------------------------------|
| 5a       | H  | H  | 0.036                        |
| 5c       | H  | Me | 0.047                        |
| 5d       | H  | Cl | 0.0056                       |
| 6a       | Me | H  | 38100                        |
| 6b       | Me | F  | 53000                        |
| 6c       | Me | Me | 17600                        |
| 6e       | Me | Cl | 18000                        |



**Table S2.10.** Rate constants of the isomerization reaction *E-5a* → *Z-5a* in s<sup>-1</sup> computed at the CVT/SCT//MP2/cc-pVDZ level of theory using polyrate.

| T (K)  | TST      | CVT      | CVT/ZCT  | CVT/SCT  |
|--------|----------|----------|----------|----------|
| 0.10   | NaN      | NaN      | NaN      | NaN      |
| 1.00   | NaN      | NaN      | NaN      | NaN      |
| 5.00   | 1.88-217 | 1.88-217 | 7.18E-03 | 3.20E-01 |
| 10.00  | 2.81-103 | 2.81-103 | 7.18E-03 | 3.20E-01 |
| 11.00  | 6.95E-93 | 6.95E-93 | 7.18E-03 | 3.20E-01 |
| 15.00  | 3.82E-65 | 3.82E-65 | 7.18E-03 | 3.20E-01 |
| 20.00  | 4.85E-46 | 4.85E-46 | 7.17E-03 | 3.19E-01 |
| 25.00  | 1.47E-34 | 1.47E-34 | 7.15E-03 | 3.18E-01 |
| 30.00  | 6.88E-27 | 6.88E-27 | 7.12E-03 | 3.17E-01 |
| 35.00  | 2.11E-21 | 2.11E-21 | 7.11E-03 | 3.16E-01 |
| 40.00  | 2.81E-17 | 2.81E-17 | 7.16E-03 | 3.16E-01 |
| 45.00  | 4.58E-14 | 4.58E-14 | 7.45E-03 | 3.21E-01 |
| 50.00  | 1.72E-11 | 1.72E-11 | 8.36E-03 | 3.35E-01 |
| 60.00  | 1.28E-07 | 1.28E-07 | 1.61E-02 | 4.54E-01 |
| 70.00  | 7.60E-05 | 7.60E-05 | 6.32E-02 | 9.66E-01 |
| 80.00  | 9.30E-03 | 9.30E-03 | 4.90E-01 | 3.47E+00 |
| 90.00  | 3.96E-01 | 3.96E-01 | 5.49E+00 | 1.93E+01 |
| 100.00 | 8.03E+00 | 8.03E+00 | 5.81E+01 | 1.29E+02 |
| 110.00 | 9.49E+01 | 9.49E+01 | 4.80E+02 | 8.22E+02 |
| 120.00 | 7.48E+02 | 7.48E+02 | 3.02E+03 | 4.44E+03 |
| 130.00 | 4.30E+03 | 4.30E+03 | 1.49E+04 | 1.99E+04 |
| 140.00 | 1.94E+04 | 1.94E+04 | 5.95E+04 | 7.50E+04 |
| 150.00 | 7.15E+04 | 7.15E+04 | 2.00E+05 | 2.42E+05 |
| 160.00 | 2.25E+05 | 2.25E+05 | 5.83E+05 | 6.86E+05 |
| 170.00 | 6.19E+05 | 6.19E+05 | 1.51E+06 | 1.73E+06 |
| 180.00 | 1.53E+06 | 1.53E+06 | 3.51E+06 | 3.98E+06 |
| 190.00 | 3.42E+06 | 3.42E+06 | 7.51E+06 | 8.40E+06 |
| 200.00 | 7.09E+06 | 7.09E+06 | 1.49E+07 | 1.65E+07 |
| 220.00 | 2.50E+07 | 2.50E+07 | 4.90E+07 | 5.34E+07 |
| 240.00 | 7.19E+07 | 7.19E+07 | 1.33E+08 | 1.43E+08 |
| 260.00 | 1.76E+08 | 1.76E+08 | 3.08E+08 | 3.29E+08 |
| 280.00 | 3.79E+08 | 3.79E+08 | 6.38E+08 | 6.76E+08 |
| 298.00 | 6.94E+08 | 6.94E+08 | 1.13E+09 | 1.19E+09 |

**Table S2.11.** Rate constants of the isomerization reaction *E-5c* → *Z-5c* in s<sup>-1</sup> computed at the CVT/SCT//MP2/cc-pVDZ level of theory using polyrate.

| T (K) | TST      | CVT      | CVT/ZCT  | CVT/SCT  |
|-------|----------|----------|----------|----------|
| 0.10  | NaN      | NaN      | NaN      | NaN      |
| 1.00  | NaN      | NaN      | NaN      | NaN      |
| 5.00  | 1.00-218 | 1.00-218 | 5.40E-03 | 2.43E-01 |
| 10.00 | 6.51-104 | 6.51-104 | 5.43E-03 | 2.44E-01 |
| 11.00 | 1.85E-93 | 1.84E-93 | 5.44E-03 | 2.45E-01 |
| 15.00 | 1.46E-65 | 1.46E-65 | 5.49E-03 | 2.47E-01 |
| 20.00 | 2.40E-46 | 2.40E-46 | 5.56E-03 | 2.50E-01 |
| 25.00 | 8.56E-35 | 8.55E-35 | 5.61E-03 | 2.53E-01 |
| 30.00 | 4.45E-27 | 4.45E-27 | 5.66E-03 | 2.55E-01 |
| 35.00 | 1.48E-21 | 1.48E-21 | 5.69E-03 | 2.56E-01 |
| 40.00 | 2.09E-17 | 2.09E-17 | 5.78E-03 | 2.58E-01 |

|        |          |          |          |          |
|--------|----------|----------|----------|----------|
| 45.00  | 3.57E-14 | 3.57E-14 | 6.06E-03 | 2.63E-01 |
| 50.00  | 1.39E-11 | 1.39E-11 | 6.87E-03 | 2.77E-01 |
| 60.00  | 1.09E-07 | 1.09E-07 | 1.38E-02 | 3.86E-01 |
| 70.00  | 6.79E-05 | 6.79E-05 | 5.59E-02 | 8.58E-01 |
| 80.00  | 8.58E-03 | 8.58E-03 | 4.16E-01 | 3.15E+00 |
| 90.00  | 3.74E-01 | 3.74E-01 | 3.96E+00 | 1.69E+01 |
| 100.00 | 7.75E+00 | 7.75E+00 | 3.40E+01 | 1.02E+02 |
| 110.00 | 9.31E+01 | 9.31E+01 | 2.35E+02 | 5.58E+02 |
| 120.00 | 7.44E+02 | 7.44E+02 | 1.32E+03 | 2.62E+03 |
| 130.00 | 4.33E+03 | 4.33E+03 | 6.06E+03 | 1.05E+04 |
| 140.00 | 1.97E+04 | 1.97E+04 | 2.36E+04 | 3.65E+04 |
| 150.00 | 7.34E+04 | 7.34E+04 | 7.92E+04 | 1.12E+05 |
| 160.00 | 2.32E+05 | 2.32E+05 | 2.34E+05 | 3.08E+05 |
| 170.00 | 6.44E+05 | 6.44E+05 | 6.19E+05 | 7.68E+05 |
| 180.00 | 1.60E+06 | 1.60E+06 | 1.48E+06 | 1.76E+06 |
| 190.00 | 3.61E+06 | 3.61E+06 | 3.27E+06 | 3.76E+06 |
| 200.00 | 7.51E+06 | 7.51E+06 | 6.71E+06 | 7.50E+06 |
| 220.00 | 2.67E+07 | 2.67E+07 | 2.35E+07 | 2.52E+07 |
| 240.00 | 7.73E+07 | 7.73E+07 | 6.74E+07 | 7.05E+07 |
| 260.00 | 1.90E+08 | 1.90E+08 | 1.65E+08 | 1.70E+08 |
| 280.00 | 4.13E+08 | 4.13E+08 | 3.59E+08 | 3.65E+08 |
| 298.00 | 7.59E+08 | 7.59E+08 | 6.62E+08 | 6.68E+08 |

**Table S2.12.** Rate constants of the isomerization reaction *E-5d* → *Z-5d* in s<sup>-1</sup> computed at the CVT/SCT//MP2/cc-pVDZ level of theory using polyrate.

| T (K)  | TST      | CVT      | CVT/ZCT  | CVT/SCT  |
|--------|----------|----------|----------|----------|
| 0.10   | NaN      | NaN      | NaN      | NaN      |
| 1.00   | NaN      | NaN      | NaN      | NaN      |
| 5.00   | 2.96-202 | 2.96-202 | 5.61E-02 | 2.05E+00 |
| 10.00  | 1.11E-95 | 1.11E-95 | 5.61E-02 | 2.05E+00 |
| 11.00  | 5.62E-86 | 5.61E-86 | 5.61E-02 | 2.05E+00 |
| 15.00  | 4.44E-60 | 4.44E-60 | 5.61E-02 | 2.05E+00 |
| 20.00  | 3.05E-42 | 3.05E-42 | 5.60E-02 | 2.05E+00 |
| 25.00  | 1.61E-31 | 1.61E-31 | 5.58E-02 | 2.04E+00 |
| 30.00  | 2.34E-24 | 2.34E-24 | 5.55E-02 | 2.03E+00 |
| 35.00  | 3.12E-19 | 3.12E-19 | 5.53E-02 | 2.02E+00 |
| 40.00  | 2.21E-15 | 2.21E-15 | 5.56E-02 | 2.02E+00 |
| 45.00  | 2.22E-12 | 2.22E-12 | 5.78E-02 | 2.04E+00 |
| 50.00  | 5.63E-10 | 5.63E-10 | 6.47E-02 | 2.14E+00 |
| 60.00  | 2.33E-06 | 2.33E-06 | 1.25E-01 | 2.91E+00 |
| 70.00  | 9.13E-04 | 9.13E-04 | 4.83E-01 | 6.24E+00 |
| 80.00  | 8.17E-02 | 8.17E-02 | 3.39E+00 | 2.18E+01 |
| 90.00  | 2.72E+00 | 2.72E+00 | 3.02E+01 | 1.10E+02 |
| 100.00 | 4.54E+01 | 4.54E+01 | 2.40E+02 | 6.22E+02 |
| 110.00 | 4.58E+02 | 4.58E+02 | 1.51E+03 | 3.21E+03 |
| 120.00 | 3.16E+03 | 3.15E+03 | 7.56E+03 | 1.41E+04 |
| 130.00 | 1.62E+04 | 1.62E+04 | 3.10E+04 | 5.23E+04 |
| 140.00 | 6.63E+04 | 6.63E+04 | 1.07E+05 | 1.68E+05 |
| 150.00 | 2.25E+05 | 2.25E+05 | 3.21E+05 | 4.73E+05 |
| 160.00 | 6.58E+05 | 6.58E+05 | 8.55E+05 | 1.19E+06 |
| 170.00 | 1.70E+06 | 1.70E+06 | 2.06E+06 | 2.74E+06 |
| 180.00 | 3.95E+06 | 3.95E+06 | 4.53E+06 | 5.82E+06 |
| 190.00 | 8.41E+06 | 8.41E+06 | 9.24E+06 | 1.15E+07 |
| 200.00 | 1.66E+07 | 1.66E+07 | 1.77E+07 | 2.14E+07 |
| 220.00 | 5.42E+07 | 5.42E+07 | 5.49E+07 | 6.38E+07 |
| 240.00 | 1.46E+08 | 1.46E+08 | 1.43E+08 | 1.61E+08 |
| 260.00 | 3.36E+08 | 3.36E+08 | 3.24E+08 | 3.56E+08 |
| 280.00 | 6.91E+08 | 6.91E+08 | 6.57E+08 | 7.09E+08 |

298.00 1.22E+09 1.22E+09 1.15E+09 1.22E+09

**Table S2.13.** Rate constants of the isomerization reaction *E-6a* → *Z-6a* in s<sup>-1</sup> computed at the CVT/SCT//MP2/cc-pVDZ level of theory using polyrate.

| T (K)  | TST      | CVT      | CVT/ZCT  | CVT/SCT  |
|--------|----------|----------|----------|----------|
| 0.10   | NaN      | NaN      | NaN      | NaN      |
| 1.00   | NaN      | NaN      | NaN      | NaN      |
| 5.00   | 0.00E+00 | 0.00E+00 | NaN      | NaN      |
| 10.00  | 8.81-162 | 6.54-162 | 2.14E-09 | 3.01E-07 |
| 11.00  | 4.54-146 | 3.38-146 | 2.15E-09 | 3.03E-07 |
| 15.00  | 3.77-104 | 2.84-104 | 2.19E-09 | 3.09E-07 |
| 20.00  | 2.63E-75 | 2.01E-75 | 2.19E-09 | 3.08E-07 |
| 25.00  | 5.48E-58 | 4.25E-58 | 2.14E-09 | 3.02E-07 |
| 30.00  | 1.95E-46 | 1.53E-46 | 2.08E-09 | 2.93E-07 |
| 35.00  | 3.51E-38 | 2.77E-38 | 2.01E-09 | 2.83E-07 |
| 40.00  | 5.46E-32 | 4.35E-32 | 1.93E-09 | 2.71E-07 |
| 45.00  | 3.57E-27 | 2.86E-27 | 1.89E-09 | 2.62E-07 |
| 50.00  | 2.54E-23 | 2.05E-23 | 1.95E-09 | 2.58E-07 |
| 60.00  | 1.52E-17 | 1.24E-17 | 2.98E-09 | 2.97E-07 |
| 70.00  | 2.02E-13 | 1.66E-13 | 1.01E-08 | 5.42E-07 |
| 80.00  | 2.48E-10 | 2.05E-10 | 8.80E-08 | 1.87E-06 |
| 90.00  | 6.22E-08 | 5.17E-08 | 1.81E-06 | 1.30E-05 |
| 100.00 | 5.14E-06 | 4.30E-06 | 4.87E-05 | 1.55E-04 |
| 110.00 | 1.90E-04 | 1.60E-04 | 1.05E-03 | 2.12E-03 |
| 120.00 | 3.82E-03 | 3.23E-03 | 1.56E-02 | 2.47E-02 |
| 130.00 | 4.83E-02 | 4.10E-02 | 1.63E-01 | 2.25E-01 |
| 140.00 | 4.24E-01 | 3.61E-01 | 1.25E+00 | 1.59E+00 |
| 150.00 | 2.78E+00 | 2.37E+00 | 7.44E+00 | 8.91E+00 |
| 160.00 | 1.44E+01 | 1.23E+01 | 3.55E+01 | 4.10E+01 |
| 170.00 | 6.10E+01 | 5.24E+01 | 1.41E+02 | 1.59E+02 |
| 180.00 | 2.20E+02 | 1.90E+02 | 4.84E+02 | 5.34E+02 |
| 190.00 | 6.94E+02 | 5.99E+02 | 1.45E+03 | 1.58E+03 |
| 200.00 | 1.94E+03 | 1.68E+03 | 3.91E+03 | 4.20E+03 |
| 220.00 | 1.15E+04 | 9.99E+03 | 2.15E+04 | 2.28E+04 |
| 240.00 | 5.02E+04 | 4.38E+04 | 8.90E+04 | 9.31E+04 |
| 260.00 | 1.74E+05 | 1.53E+05 | 2.94E+05 | 3.05E+05 |
| 280.00 | 5.04E+05 | 4.43E+05 | 8.18E+05 | 8.44E+05 |
| 298.00 | 1.16E+06 | 1.02E+06 | 1.82E+06 | 1.87E+06 |

**Table S2.14.** Rate constants of the isomerization reaction *E-6b* → *Z-6b* in s<sup>-1</sup> computed at the CVT/SCT//MP2/cc-pVDZ level of theory using polyrate.

| T (K) | TST      | CVT      | CVT/ZCT  | CVT/SCT  |
|-------|----------|----------|----------|----------|
| 0.10  | NaN      | NaN      | NaN      | NaN      |
| 1.00  | NaN      | NaN      | NaN      | NaN      |
| 5.00  | 0.00E+00 | 0.00E+00 | NaN      | NaN      |
| 10.00 | 1.29-155 | 7.27-156 | 4.73E-09 | 6.30E-07 |
| 11.00 | 1.83-140 | 1.04-140 | 4.80E-09 | 6.39E-07 |
| 15.00 | 4.88-100 | 2.84-100 | 4.98E-09 | 6.63E-07 |
| 20.00 | 3.22E-72 | 1.92E-72 | 5.08E-09 | 6.77E-07 |
| 25.00 | 1.63E-55 | 9.93E-56 | 5.08E-09 | 6.76E-07 |
| 30.00 | 2.27E-44 | 1.41E-44 | 5.00E-09 | 6.66E-07 |
| 35.00 | 2.09E-36 | 1.31E-36 | 4.88E-09 | 6.50E-07 |
| 40.00 | 1.96E-30 | 1.25E-30 | 4.77E-09 | 6.31E-07 |

|        |          |          |          |          |
|--------|----------|----------|----------|----------|
| 45.00  | 8.70E-26 | 5.60E-26 | 4.78E-09 | 6.18E-07 |
| 50.00  | 4.53E-22 | 2.95E-22 | 5.15E-09 | 6.22E-07 |
| 60.00  | 1.70E-16 | 1.12E-16 | 9.59E-09 | 7.93E-07 |
| 70.00  | 1.61E-12 | 1.08E-12 | 3.84E-08 | 1.69E-06 |
| 80.00  | 1.54E-09 | 1.04E-09 | 3.47E-07 | 6.44E-06 |
| 90.00  | 3.17E-07 | 2.17E-07 | 6.48E-06 | 4.50E-05 |
| 100.00 | 2.24E-05 | 1.55E-05 | 1.39E-04 | 4.93E-04 |
| 110.00 | 7.27E-04 | 5.08E-04 | 2.29E-03 | 5.70E-03 |
| 120.00 | 1.31E-02 | 9.25E-03 | 2.69E-02 | 5.48E-02 |
| 130.00 | 1.52E-01 | 1.08E-01 | 2.30E-01 | 4.12E-01 |
| 140.00 | 1.23E+00 | 8.78E-01 | 1.52E+00 | 2.46E+00 |
| 150.00 | 7.54E+00 | 5.41E+00 | 7.98E+00 | 1.20E+01 |
| 160.00 | 3.67E+01 | 2.65E+01 | 3.48E+01 | 4.91E+01 |
| 170.00 | 1.48E+02 | 1.07E+02 | 1.29E+02 | 1.73E+02 |
| 180.00 | 5.10E+02 | 3.71E+02 | 4.20E+02 | 5.39E+02 |
| 190.00 | 1.54E+03 | 1.13E+03 | 1.21E+03 | 1.50E+03 |
| 200.00 | 4.15E+03 | 3.05E+03 | 3.16E+03 | 3.80E+03 |
| 220.00 | 2.30E+04 | 1.70E+04 | 1.67E+04 | 1.92E+04 |
| 240.00 | 9.51E+04 | 7.08E+04 | 6.75E+04 | 7.50E+04 |
| 260.00 | 3.15E+05 | 2.36E+05 | 2.21E+05 | 2.39E+05 |
| 280.00 | 8.75E+05 | 6.60E+05 | 6.09E+05 | 6.49E+05 |
| 298.00 | 1.95E+06 | 1.48E+06 | 1.35E+06 | 1.42E+06 |

**Table S2.15.** Rate constants of the isomerization reaction *E-6c* → *Z-6c* in s<sup>-1</sup> computed at the CVT/SCT//MP2/cc-pVDZ level of theory using polyrate.

| T (K)  | TST      | CVT      | CVT/ZCT  | CVT/SCT  |
|--------|----------|----------|----------|----------|
| 0.10   | NaN      | NaN      | NaN      | NaN      |
| 1.00   | NaN      | NaN      | NaN      | NaN      |
| 5.00   | 0.00E+00 | 0.00E+00 | NaN      | NaN      |
| 10.00  | 4.38-161 | 2.26-161 | 1.47E-09 | 2.15E-07 |
| 11.00  | 1.95-145 | 1.01-145 | 1.49E-09 | 2.18E-07 |
| 15.00  | 1.09-103 | 5.82-104 | 1.54E-09 | 2.25E-07 |
| 20.00  | 5.77E-75 | 3.18E-75 | 1.56E-09 | 2.28E-07 |
| 25.00  | 1.02E-57 | 5.75E-58 | 1.55E-09 | 2.26E-07 |
| 30.00  | 3.25E-46 | 1.87E-46 | 1.51E-09 | 2.21E-07 |
| 35.00  | 5.39E-38 | 3.16E-38 | 1.47E-09 | 2.14E-07 |
| 40.00  | 7.89E-32 | 4.69E-32 | 1.42E-09 | 2.07E-07 |
| 45.00  | 4.93E-27 | 2.97E-27 | 1.40E-09 | 2.01E-07 |
| 50.00  | 3.38E-23 | 2.06E-23 | 1.46E-09 | 1.99E-07 |
| 60.00  | 1.91E-17 | 1.19E-17 | 2.35E-09 | 2.34E-07 |
| 70.00  | 2.43E-13 | 1.54E-13 | 8.41E-09 | 4.41E-07 |
| 80.00  | 2.90E-10 | 1.85E-10 | 7.51E-08 | 1.58E-06 |
| 90.00  | 7.11E-08 | 4.60E-08 | 1.43E-06 | 1.10E-05 |
| 100.00 | 5.77E-06 | 3.77E-06 | 3.14E-05 | 1.23E-04 |
| 110.00 | 2.09E-04 | 1.38E-04 | 5.36E-04 | 1.46E-03 |
| 120.00 | 4.16E-03 | 2.77E-03 | 6.60E-03 | 1.44E-02 |
| 130.00 | 5.21E-02 | 3.50E-02 | 6.03E-02 | 1.12E-01 |
| 140.00 | 4.52E-01 | 3.06E-01 | 4.25E-01 | 6.96E-01 |
| 150.00 | 2.94E+00 | 2.00E+00 | 2.40E+00 | 3.56E+00 |
| 160.00 | 1.51E+01 | 1.03E+01 | 1.12E+01 | 1.53E+01 |
| 170.00 | 6.36E+01 | 4.38E+01 | 4.44E+01 | 5.71E+01 |
| 180.00 | 2.28E+02 | 1.58E+02 | 1.53E+02 | 1.87E+02 |
| 190.00 | 7.15E+02 | 4.98E+02 | 4.65E+02 | 5.46E+02 |
| 200.00 | 1.99E+03 | 1.39E+03 | 1.27E+03 | 1.45E+03 |
| 220.00 | 1.17E+04 | 8.24E+03 | 7.31E+03 | 7.96E+03 |
| 240.00 | 5.07E+04 | 3.60E+04 | 3.16E+04 | 3.34E+04 |
| 260.00 | 1.75E+05 | 1.25E+05 | 1.09E+05 | 1.13E+05 |
| 280.00 | 5.03E+05 | 3.63E+05 | 3.15E+05 | 3.23E+05 |

298.00 1.15E+06 8.34E+05 7.25E+05 7.36E+05

**Table S2.16.** Rate constants of the isomerization reaction *E-6e* → *Z-6e* in s<sup>-1</sup> computed at the CVT/SCT//MP2/cc-pVDZ level of theory using polyrate.

| T (K)  | TST      | CVT      | CVT/ZCT  | CVT/SCT  |
|--------|----------|----------|----------|----------|
| 0.10   | NaN      | NaN      | NaN      | NaN      |
| 1.00   | NaN      | NaN      | NaN      | NaN      |
| 5.00   | 0.00E+00 | 0.00E+00 | NaN      | NaN      |
| 10.00  | 2.41-155 | 1.29-155 | 5.42E-09 | 6.47E-07 |
| 11.00  | 3.23-140 | 1.74-140 | 5.49E-09 | 6.56E-07 |
| 15.00  | 7.39-100 | 4.08-100 | 5.71E-09 | 6.83E-07 |
| 20.00  | 4.37E-72 | 2.49E-72 | 5.82E-09 | 6.96E-07 |
| 25.00  | 2.08E-55 | 1.21E-55 | 5.81E-09 | 6.94E-07 |
| 30.00  | 2.76E-44 | 1.64E-44 | 5.71E-09 | 6.82E-07 |
| 35.00  | 2.45E-36 | 1.48E-36 | 5.58E-09 | 6.65E-07 |
| 40.00  | 2.25E-30 | 1.37E-30 | 5.51E-09 | 6.49E-07 |
| 45.00  | 9.78E-26 | 6.04E-26 | 5.65E-09 | 6.45E-07 |
| 50.00  | 5.01E-22 | 3.13E-22 | 6.27E-09 | 6.67E-07 |
| 60.00  | 1.83E-16 | 1.16E-16 | 1.16E-08 | 8.99E-07 |
| 70.00  | 1.71E-12 | 1.10E-12 | 4.32E-08 | 1.90E-06 |
| 80.00  | 1.61E-09 | 1.05E-09 | 3.71E-07 | 6.95E-06 |
| 90.00  | 3.28E-07 | 2.17E-07 | 6.90E-06 | 4.70E-05 |
| 100.00 | 2.30E-05 | 1.54E-05 | 1.58E-04 | 5.16E-04 |
| 110.00 | 7.42E-04 | 5.00E-04 | 2.82E-03 | 6.24E-03 |
| 120.00 | 1.34E-02 | 9.07E-03 | 3.53E-02 | 6.38E-02 |
| 130.00 | 1.53E-01 | 1.05E-01 | 3.17E-01 | 5.08E-01 |
| 140.00 | 1.24E+00 | 8.54E-01 | 2.14E+00 | 3.17E+00 |
| 150.00 | 7.56E+00 | 5.24E+00 | 1.13E+01 | 1.60E+01 |
| 160.00 | 3.67E+01 | 2.56E+01 | 4.94E+01 | 6.67E+01 |
| 170.00 | 1.48E+02 | 1.03E+02 | 1.82E+02 | 2.38E+02 |
| 180.00 | 5.08E+02 | 3.58E+02 | 5.85E+02 | 7.43E+02 |
| 190.00 | 1.53E+03 | 1.08E+03 | 1.66E+03 | 2.07E+03 |
| 200.00 | 4.12E+03 | 2.93E+03 | 4.27E+03 | 5.21E+03 |
| 220.00 | 2.27E+04 | 1.63E+04 | 2.19E+04 | 2.59E+04 |
| 240.00 | 9.38E+04 | 6.78E+04 | 8.57E+04 | 9.89E+04 |
| 260.00 | 3.10E+05 | 2.25E+05 | 2.73E+05 | 3.08E+05 |
| 280.00 | 8.61E+05 | 6.30E+05 | 7.35E+05 | 8.19E+05 |
| 298.00 | 1.91E+06 | 1.41E+06 | 1.60E+06 | 1.76E+06 |

**Table S2.17.** Rate constants of the isomerization reaction *E-7a* → *Z-7a* in s<sup>-1</sup> computed at the CVT/SCT//MP2/cc-pVDZ level of theory using polyrate.

| T (K) | TST      | CVT      | CVT/ZCT  | CVT/SCT  |
|-------|----------|----------|----------|----------|
| 0.10  | NaN      | NaN      | NaN      | NaN      |
| 1.00  | NaN      | NaN      | NaN      | NaN      |
| 5.00  | 0.00E+00 | 0.00E+00 | NaN      | NaN      |
| 10.00 | 1.50-147 | 9.63-148 | 1.31E-07 | 1.04E-05 |
| 11.00 | 3.92-133 | 2.54-133 | 1.32E-07 | 1.05E-05 |
| 15.00 | 1.17E-94 | 7.73E-95 | 1.37E-07 | 1.09E-05 |
| 20.00 | 3.56E-68 | 2.41E-68 | 1.42E-07 | 1.12E-05 |
| 25.00 | 2.92E-52 | 2.01E-52 | 1.45E-07 | 1.15E-05 |
| 30.00 | 1.23E-41 | 8.55E-42 | 1.48E-07 | 1.18E-05 |
| 35.00 | 4.85E-34 | 3.42E-34 | 1.50E-07 | 1.19E-05 |
| 40.00 | 2.45E-28 | 1.75E-28 | 1.52E-07 | 1.20E-05 |
| 45.00 | 6.77E-24 | 4.86E-24 | 1.56E-07 | 1.22E-05 |

|        |          |          |          |          |
|--------|----------|----------|----------|----------|
| 50.00  | 2.43E-20 | 1.76E-20 | 1.67E-07 | 1.26E-05 |
| 60.00  | 5.31E-15 | 3.90E-15 | 2.52E-07 | 1.54E-05 |
| 70.00  | 3.49E-11 | 2.59E-11 | 7.57E-07 | 2.76E-05 |
| 80.00  | 2.57E-08 | 1.92E-08 | 5.66E-06 | 8.78E-05 |
| 90.00  | 4.37E-06 | 3.30E-06 | 9.62E-05 | 5.45E-04 |
| 100.00 | 2.67E-04 | 2.03E-04 | 2.08E-03 | 5.65E-03 |
| 110.00 | 7.70E-03 | 5.90E-03 | 3.60E-02 | 6.60E-02 |
| 120.00 | 1.27E-01 | 9.79E-02 | 4.44E-01 | 6.62E-01 |
| 130.00 | 1.36E+00 | 1.05E+00 | 3.94E+00 | 5.24E+00 |
| 140.00 | 1.04E+01 | 8.08E+00 | 2.63E+01 | 3.26E+01 |
| 150.00 | 6.04E+01 | 4.72E+01 | 1.38E+02 | 1.64E+02 |
| 160.00 | 2.81E+02 | 2.21E+02 | 5.96E+02 | 6.84E+02 |
| 170.00 | 1.09E+03 | 8.61E+02 | 2.17E+03 | 2.44E+03 |
| 180.00 | 3.64E+03 | 2.88E+03 | 6.85E+03 | 7.57E+03 |
| 190.00 | 1.07E+04 | 8.49E+03 | 1.92E+04 | 2.09E+04 |
| 200.00 | 2.82E+04 | 2.24E+04 | 4.85E+04 | 5.24E+04 |
| 220.00 | 1.50E+05 | 1.20E+05 | 2.41E+05 | 2.56E+05 |
| 240.00 | 5.99E+05 | 4.82E+05 | 9.12E+05 | 9.60E+05 |
| 260.00 | 1.93E+06 | 1.56E+06 | 2.81E+06 | 2.94E+06 |
| 280.00 | 5.25E+06 | 4.26E+06 | 7.35E+06 | 7.64E+06 |
| 298.00 | 1.15E+07 | 9.36E+06 | 1.56E+07 | 1.62E+07 |

### 3. Computed Linear Free Energy Relationships

The half-lives computation using Polyrate described in Section 2 yielded the intrinsic reaction coordinates (IRCs) that have been augmented with the zero-point vibrational energies ZPVEs. For example, **Figure S3.1** illustrates the barrier widths ( $w_p$ ) of the rotamerization of **E-6a**  $\rightarrow$  **Z-6a**. “Collision energy” is given by half of the ZPVE ( $v_E$ ) of the vibrational “reaction” mode (C–O bond rotations in the carboxylic motif) of the *E*-isomer towards the transition structure. The barrier widths of eight compounds, four for each series, are listed in Table S3.1, and the Bell–Evans–Polanyi (BEP) plot of the width against the computed reaction free energy is presented in Figure S3.2(a).

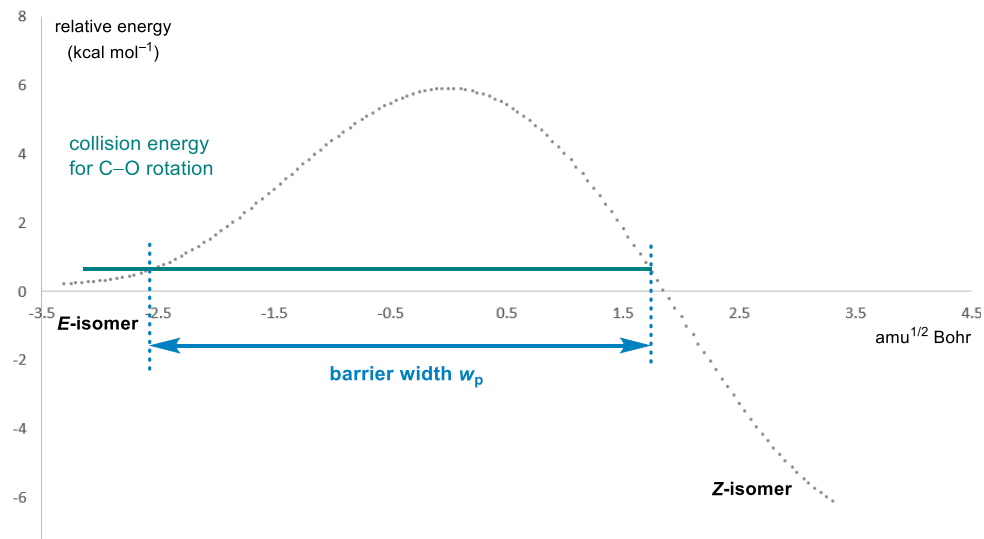

**Figure S3.1.** ZPVE-corrected IRC of the reaction **E-6a**  $\rightarrow$  **Z-6a** computed at the CVT/SCT//MP2/cc-pVDZ level of theory using Polyrate Version 2017-c.<sup>3</sup>

**Table S3.1.** Computed (MP2/cc-pVDZ) free energy change ( $\Delta G$ ), free energy barrier height ( $\Delta^\ddagger G$ ) and width ( $w_p$ ) of  $E \rightarrow Z$  isomerization for deuterated carboxylic acids (ArCOOD). The widths were obtained from the ZPVE-corrected IRCs.

| Compound                     | $\Delta G$ (kcal mol <sup>-1</sup> ) | $\nu_E$ (cm <sup>-1</sup> ) | $w_p$ ( u <sup>1/2</sup> Bohr) |
|------------------------------|--------------------------------------|-----------------------------|--------------------------------|
| 5a. R=H, X=H                 | -6.6                                 | 357.6                       | 4.421                          |
| 5c. R=H, X=Me                | -6.5                                 | 368.6                       | 4.436                          |
| 5d. R=H, X=Cl                | -7.1                                 | 363.1                       | 4.269                          |
| 5e. R=H, X=CH <sub>2</sub> F | -6.8                                 | 362.5                       | 4.358                          |
| 6a. R=Me, X=Me               | -4.1                                 | 393.2                       | 5.159                          |
| 6c. R=Me, X=F                | -4.4                                 | 393.2                       | 5.089                          |
| 6e. R=Me, X=Cl               | -4.4                                 | 389.9                       | 5.075                          |
| 6f. R=Me, X=CN               | -4.6                                 | 383.8                       | 5.024                          |

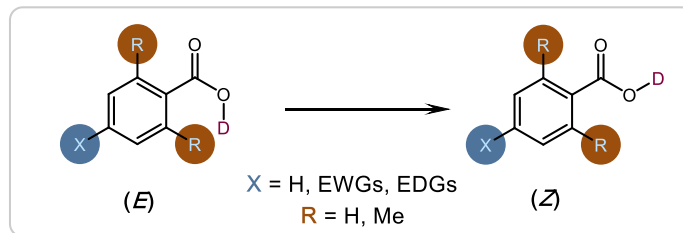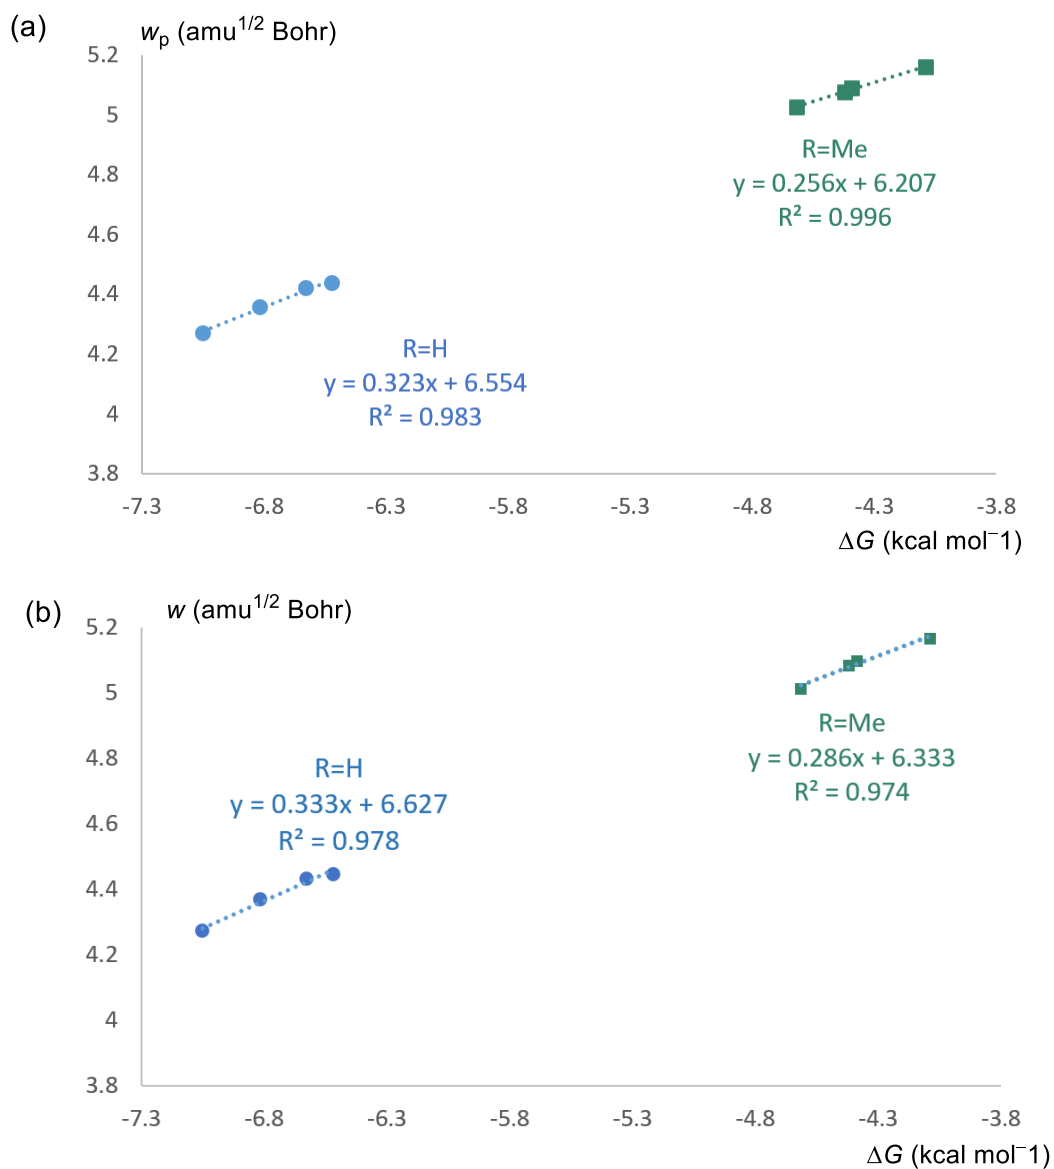

**Figure S3.2.** (a) BEP correlations for the data in **Table S3.1**. For  $R = \text{H}$ ,  $X = \text{Cl, CFH}_2, \text{H, Me}$ ; for  $R = \text{Me}$ ,  $X = \text{CN, Cl, F, H, Me}$ ; both in the ascending order of free energy change of isomerization. (b) BEP correlations for the same compounds as in (a), where the barrier widths ( $w$ ) were obtained via the approximation presented in **Figure S3.3**.

To significantly expand the data set to map out multiple LFERs of the barrier width at a reasonable computational cost, we approximated the barrier width ( $w$ ) obtained from the IRSs that have not been ZPVE-corrected (**Figure S3.3**). The BEP correlation of the approximated width for the same eight



compounds is shown in **Figure S3.2(b)**. The barrier widths obtained *via* the two method agree well (compare **Table S3.1** with **Table S3.3** below). The two plots in **Figure S3.2(a)** and **(b)** are also in good agreement: in both, the *ortho*-Me series display a smaller slope and a smaller intercept than the *ortho*-H series.

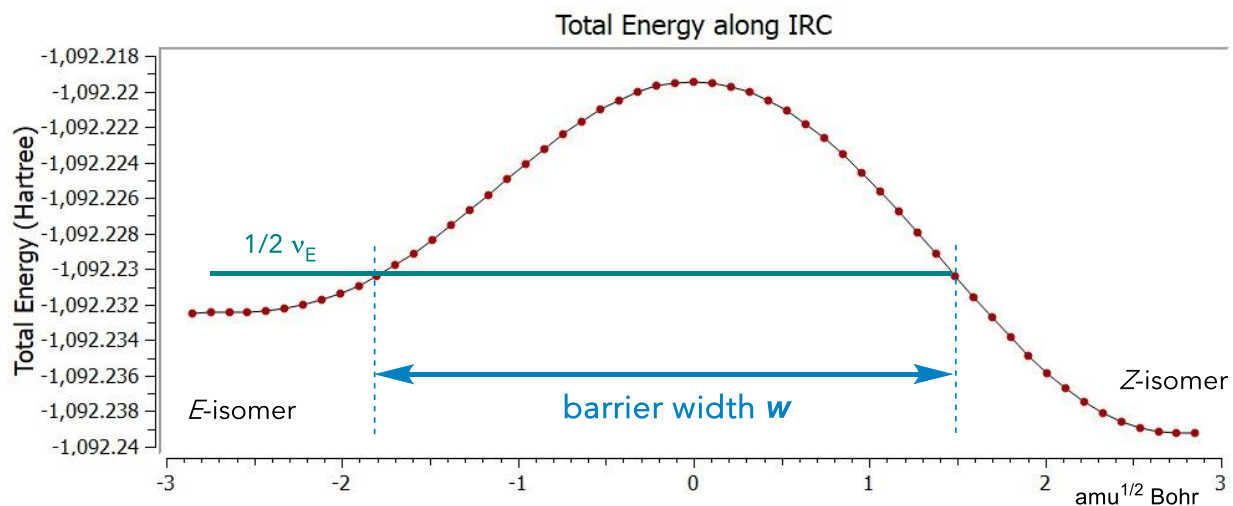

**Figure S3.3.** IRC of the reaction ***E-4a* → *Z-4a*** computed by connecting the rotamerization transition structure with the *E* and *Z* conformers at the MP2/cc-pVDZ level of theory. Note that only the provided relative energies of the stationary points are ZPVE corrected, while the IRC curve is not. The barrier widths (*w*) listed in **Tables S3.2** and **S3.3** were obtained from this approximation.

**Table S3.2.** Computed (MP2/cc-pVDZ) free energy change ( $\Delta G$ ), free energy barrier height ( $\Delta^\ddagger G$ ) and width ( $w$ ) of  $E \rightarrow Z$  isomerization for protium carboxylic acids (ArCOOH). The widths were obtained from the approximation shown in **Figure S3.3**.

| Compound                            | $\Delta G$ (kcal mol <sup>-1</sup> ) | $\Delta^\ddagger G$ (kcal mol <sup>-1</sup> ) | $\nu_E$ (cm <sup>-1</sup> ) | $w$ ( u <sup>1/2</sup> Bohr) |
|-------------------------------------|--------------------------------------|-----------------------------------------------|-----------------------------|------------------------------|
| <b>1a.</b> R=H, X=H                 | -6.6                                 | 5.0                                           | 496.4                       | 3.188                        |
| <b>1b.</b> R=H, X=F                 | -7.0                                 | 4.6                                           | 492.0                       | 3.077                        |
| <b>1c.</b> R=H, X=Me                | -6.5                                 | 5.0                                           | 495.7                       | 3.203                        |
| <b>1d.</b> R=H, X=Cl                | -7.0                                 | 4.6                                           | 485.2                       | 3.097                        |
| <b>1e.</b> R=H, X=CH <sub>2</sub> F | -6.8                                 | 4.8                                           | 500.3                       | 3.141                        |
| <b>1f.</b> R=H, X=CN                | -7.4                                 | 4.5                                           | 480.9                       | 3.036                        |
| <b>2a.</b> R=Me, X=H                | -4.1                                 | 7.8                                           | 540.6                       | 3.686                        |
| <b>2b.</b> R=Me, X=F                | -4.4                                 | 7.5                                           | 547.7                       | 3.632                        |
| <b>2c.</b> R=Me, X=Me               | -4.1                                 | 7.8                                           | 544.7                       | 3.678                        |
| <b>2d.</b> R=Me, X=NO <sub>2</sub>  | -4.6                                 | 7.4                                           | 532.4                       | 3.588                        |
| <b>2e.</b> R=Me, X=Cl               | -4.4                                 | 7.5                                           | 541.2                       | 3.625                        |
| <b>2f.</b> R=Me, X=CN               | -4.6                                 | 7.4                                           | 536.6                       | 3.603                        |
| <b>2g.</b> R=Me, X=CCH              | -4.3                                 | 7.6                                           | 544.4                       | 3.638                        |
| <b>2h.</b> R=Me, X=AcNMe            | -4.5                                 | 7.5                                           | 544.4                       | 3.613                        |
| <b>3a.</b> R=iPr, X=H               | -3.7                                 | 8.4                                           | 559.4                       | 3.967                        |
| <b>3b.</b> R=iPr, X=F               | -3.9                                 | 8.2                                           | 557.7                       | 3.973                        |
| <b>3c.</b> R=iPr, X=CF <sub>3</sub> | -4.1                                 | 8.1                                           | 561.6                       | 3.928                        |
| <b>3d.</b> R=iPr, X=Me              | -3.7                                 | 8.4                                           | 560.6                       | 3.968                        |
| <b>3e.</b> R=iPr, X=NO <sub>2</sub> | -4.1                                 | 8.0                                           | 559.1                       | 3.915                        |
| <b>3f.</b> R=iPr, X=Cl              | -3.9                                 | 8.2                                           | 559.9                       | 3.965                        |
| <b>3g.</b> R=iPr, X=CN              | -4.2                                 | 8.0                                           | 557.9                       | 3.930                        |
| <b>4a.</b> R=CF <sub>3</sub> , X=H  | -4.1                                 | 7.2                                           | 498.5                       | 3.608                        |
| <b>4b.</b> R=CF <sub>3</sub> , X=Me | -4.0                                 | 7.2                                           | 493.9                       | 3.630                        |
| <b>4c.</b> R=CF <sub>3</sub> , X=Cl | -4.3                                 | 7.1                                           | 495.9                       | 3.599                        |
| <b>4d.</b> R=CF <sub>3</sub> , X=CN | -4.5                                 | 6.8                                           | 489.3                       | 3.552                        |

**Table S3.3.** Computed (MP2/cc-pVDZ) free energy change ( $\Delta G$ ), free energy barrier height ( $\Delta^\ddagger G$ ) and width ( $w$ ) of  $E \rightarrow Z$  isomerization for deuterated carboxylic acids (ArCOOD). The widths were obtained from the approximation shown in **Figure S3.3**.

| Compound                                         | $\Delta G$ (kcal mol <sup>-1</sup> ) | $\Delta^\ddagger G$ (kcal mol <sup>-1</sup> ) | $\nu_E$ (cm <sup>-1</sup> ) | $w$ ( u <sup>1/2</sup> Bohr) |
|--------------------------------------------------|--------------------------------------|-----------------------------------------------|-----------------------------|------------------------------|
| <b>5a.</b> R=H, X=H                              | -6.6                                 | 5.2                                           | 357.6                       | 4.433                        |
| <b>5b.</b> R=H, X=F                              | -7.0                                 | 4.9                                           | 362.4                       | 4.276                        |
| <b>5c.</b> R=H, X=Me                             | -6.5                                 | 5.2                                           | 368.6                       | 4.446                        |
| <b>5d.</b> R=H, X=Cl                             | -7.1                                 | 4.9                                           | 363.1                       | 4.275                        |
| <b>5e.</b> R=H, X=CH <sub>2</sub> F              | -6.8                                 | 5.1                                           | 362.5                       | 4.369                        |
| <b>5f.</b> R=H, X=CCH                            | -6.9                                 | 5.0                                           | 371.6                       | 4.309                        |
| <b>6a.</b> R=Me, X=H                             | -4.1                                 | 8.1                                           | 391.4                       | 5.162                        |
| <b>6b.</b> R=Me, X=F                             | -4.4                                 | 7.8                                           | 392.8                       | 5.098                        |
| <b>6c.</b> R=Me, X=Me                            | -4.1                                 | 8.0                                           | 393.2                       | 5.166                        |
| <b>6d.</b> R=Me, X=Br                            | -4.4                                 | 7.8                                           | 389.0                       | 5.082                        |
| <b>6e.</b> R=Me, X=Cl                            | -4.4                                 | 7.8                                           | 389.9                       | 5.084                        |
| <b>6f.</b> R=Me, X=CN                            | -4.6                                 | 7.7                                           | 383.8                       | 5.012                        |
| <b>6h.</b> R=Me, X=NMe <sub>2</sub>              | -4.2                                 | 7.7                                           | 397.2                       | 5.144                        |
| <b>6i.</b> R=Me, X=CHO                           | -4.4                                 | 7.9                                           | 386.2                       | 5.093                        |
| <b>7a.</b> R=CF <sub>3</sub> , X=H               | -4.1                                 | 7.3                                           | 357.9                       | 5.061                        |
| <b>7b.</b> R=CF <sub>3</sub> , X=CF <sub>3</sub> | -4.4                                 | 7.1                                           | 354.6                       | 4.997                        |
| <b>7c.</b> R=CF <sub>3</sub> , X=NO <sub>2</sub> | -4.5                                 | 7.0                                           | 354.7                       | 4.979                        |
| <b>7d.</b> R=CF <sub>3</sub> , X=CN              | -4.5                                 | 7.0                                           | 353.9                       | 4.976                        |
| <b>7e.</b> R=CF <sub>3</sub> , X=CCH             | -4.1                                 | 7.4                                           | 357.1                       | 5.060                        |

## 4. Matrix Isolation and Computed IR Spectra

Equipment used in matrix isolation, photoexcitation, and IR measurement:

- Sumitomo cryostat system consisting of an RDK 408D2 closed-cycle refrigerator cold head and an F-70 compressor unit.
- Bruker Vertex 70 FTIR spectrometer
- 150 W Hamamatsu Xe(Hg) high-pressure lamp

A polished CsI window was mounted in the cold head's sample holder. The sample holder, connected with silicon diodes for temperature measurements, was covered by the vacuum shroud, which was equipped with KBr windows to allow for IR measurements. The sample and the host gas (argon, purity of 99.999%) were deposited at 15 K. All spectral data were collected at 11 K, except for one kinetic experiment, which was performed at 20 K. Argon was stored in a 2 L gas balloon, which was evacuated and filled three times before every experiment. All monodeuterated aryl carboxylic acids (ArCOOD) were obtained (from the respective commercial ArCOOH without further purification) and were purified with five re-crystallizations from D<sub>2</sub>O (co-solvated with 1/3 volume of HPLC grade acetone to increase solubility).

Five carboxylic acids were studied, each was evaporated at r.t., mixed with Ar in the gas phase, condensed on the cold window of the matrix apparatus (CsI, 15 K) ca. 50 mm away from the substance reservoir. The evaporation time for each compound is shown below:

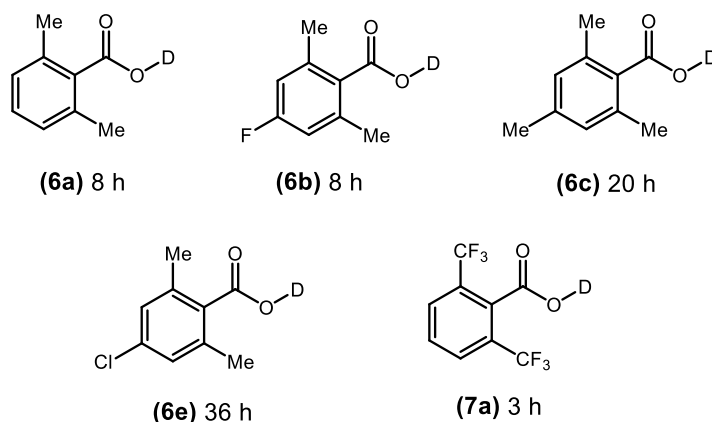

The higher-lying *E*-isomers were generated photochemically by irradiation of the *Z*-isomer at 254 nm, for 30 min.

**Table S4.1.** Computed and experimental vibrational frequencies in Ar solid at 11 K for *E-6a* and *Z-6a* (wavenumbers [ $\text{cm}^{-1}$ ], intensities [ $\text{km mol}^{-1}$ ]).

| MP2/cc-pVDZ<br>( <i>Z-6a</i> ) / $\text{cm}^{-1}$ | Intensity /<br>$\text{km mol}^{-1}$ | Approximate<br>Assignment                     | MP2/cc-pVDZ<br>( <i>E-6a</i> ) / $\text{cm}^{-1}$ | Intensity /<br>$\text{km mol}^{-1}$ | Approximate<br>Assignment                     | Ar matrix <sup>a</sup> / $\text{cm}^{-1}$ |
|---------------------------------------------------|-------------------------------------|-----------------------------------------------|---------------------------------------------------|-------------------------------------|-----------------------------------------------|-------------------------------------------|
| 900.6                                             | < 0.1                               | H-C-C-C<br>torsion                            | 900.8                                             | < 0.1                               | H-C-C-C<br>torsion                            | not observed                              |
| 940.6                                             | 7.3                                 | C-C-C bend +<br>H-C-C bend                    | 939.2                                             | 5.3                                 | C-C-C bend +<br>H-C-C bend                    | not observed                              |
| 942.6                                             | 12.5                                | H-C-C-C<br>torsion                            | 941.9                                             | 6.5                                 | H-C-C-C<br>torsion                            | 932.1 vw                                  |
| 1011.7                                            | 5.5                                 | ring-CH <sub>3</sub> wag                      | 1007.2                                            | 4.3                                 | ring-CH <sub>3</sub> wag                      | not observed                              |
| 1019.0                                            | 203.9                               | C-O-H bend                                    | 951.9                                             | 63.1                                | C-O-H bend                                    | 995.2 m (Z), 932.1 m (E)                  |
| 1042.7                                            | 17.8                                | ring-CH <sub>3</sub> wag                      | 1041.5                                            | 6.8                                 | ring-CH <sub>3</sub> wag                      | 1036.1 vw                                 |
| 1052.3                                            | 0.6                                 | ring-CH <sub>3</sub> wag                      | 1051.3                                            | 1.8                                 | ring-CH <sub>3</sub> wag                      | not observed                              |
| 1066.1                                            | 3.7                                 | ring-CH <sub>3</sub> wag                      | 1064.2                                            | 6.4                                 | ring-CH <sub>3</sub> wag                      | 1041.4 vw                                 |
| 1090.7                                            | 156.8                               | in-plane C-C<br>ring stretch                  | 1087.9                                            | 199.8                               | in-plane C-C<br>ring stretch                  | 1070.2 s                                  |
| 1139.5                                            | 59.6                                | H-C-C in-<br>plane bend                       | 1135.2                                            | 138.8                               | H-C-C in-<br>plane bend                       | 1120.3 m                                  |
| 1184.7                                            | 2.4                                 | H-C-C in-<br>plane bend                       | 1184.3                                            | 1.7                                 | H-C-C in-<br>plane bend                       | 1173.3 w                                  |
| 1269.8                                            | 7.9                                 | H-C-C in-<br>plane bend                       | 1270.4                                            | 19.4                                | H-C-C in-<br>plane bend                       | 1276.3 w (Z), 1253.7 m<br>(E)             |
| 1287.6                                            | 10.2                                | ring C-C<br>stretch                           | 1286.6                                            | 57.6                                | ring C-C<br>stretch                           | 1282.2 w (Z), 1266.3 m<br>(E)             |
| 1341.2                                            | 588.3                               | C-O stretch                                   | 1318.0                                            | 719.9                               | C-O stretch                                   | 1298.3 vs (Z), 1274.2 vs<br>(E)           |
| 1408.5                                            | 1.8                                 | C-H wag<br>(CH <sub>3</sub> )                 | 1409.0                                            | 2.1                                 | C-H wag (CH <sub>3</sub> )                    | not observed                              |
| 1413.5                                            | 5.2                                 | C-H wag<br>(CH <sub>3</sub> )                 | 1415.0                                            | 4.5                                 | C-H wag (CH <sub>3</sub> )                    | 1383.6 w                                  |
| 1454.1                                            | 2.7                                 | C-H twist<br>(CH <sub>3</sub> )               | 1457.5                                            | 4.8                                 | C-H twist<br>(CH <sub>3</sub> )               | 1386.3 w                                  |
| 1465.8                                            | 121.4                               | C-H sciss<br>(CH <sub>3</sub> )               | 1462.0                                            | 81.1                                | C-H sciss<br>(CH <sub>3</sub> )               | 1426.4 m                                  |
| 1481.4                                            | 22.0                                | C-H sciss<br>(CH <sub>3</sub> )               | 1479.6                                            | 17.8                                | C-H sciss<br>(CH <sub>3</sub> )               | 1431.7 w/m                                |
| 1484.6                                            | 6.4                                 | C-H sciss<br>(CH <sub>3</sub> )               | 1484.4                                            | 6.6                                 | C-H sciss<br>(CH <sub>3</sub> )               | 1456.7 w                                  |
| 1486.5                                            | 26.9                                | C-H sciss<br>(CH <sub>3</sub> )               | 1491.4                                            | 20.9                                | C-H sciss<br>(CH <sub>3</sub> )               | 1489.3 w                                  |
| 1505.7                                            | 52.8                                | C-H sciss<br>(CH <sub>3</sub> ) + C-H<br>rock | 1506.2                                            | 35.7                                | C-H sciss<br>(CH <sub>3</sub> ) + C-H<br>rock | 1452 m                                    |
| 1507.1                                            | 26.0                                | C-H sciss<br>(CH <sub>3</sub> ) + C-H<br>rock | 1506.7                                            | 40.6                                | C-H sciss<br>(CH <sub>3</sub> ) + C-H<br>rock | 1473.8 m                                  |
| 1641.4                                            | 6.0                                 | C=C stretch                                   | 1639.2                                            | 5.9                                 | C=C stretch                                   | 1601.1 w                                  |
| 1651.5                                            | 19.9                                | C=C stretch                                   | 1650.9                                            | 13.5                                | C=C stretch                                   | 1603.9 w                                  |
| 1815.2                                            | 493.7                               | C=O stretch                                   | 1843.0                                            | 469.7                               | C=O stretch                                   | 1748.2 vs (Z), 1785.1 vs<br>(E)           |
| 2721.6                                            | 76.2                                | O-D stretch                                   | 2777.4                                            | 41.0                                | O-D stretch                                   | 2619.1 m/s (Z), 2660.1<br>m/s (E)         |

|        |      |                                         |        |      |                                         |              |
|--------|------|-----------------------------------------|--------|------|-----------------------------------------|--------------|
| 3088.5 | 52.9 | C-H stretch<br>(CH <sub>3</sub> , sym)  | 3077.9 | 27.9 | C-H stretch<br>(CH <sub>3</sub> , sym)  | 2939.5 w     |
| 3089.0 | 4.5  | C-H stretch<br>(CH <sub>3</sub> , sym)  | 3085.5 | 22.2 | C-H stretch<br>(CH <sub>3</sub> , sym)  | 2949.8 w     |
| 3181.6 | 14.2 | C-H stretch<br>(CH <sub>3</sub> , asym) | 3164.5 | 14.0 | C-H stretch<br>(CH <sub>3</sub> , asym) | 2978.6 w     |
| 3184.1 | 14.8 | C-H stretch<br>(CH <sub>3</sub> , asym) | 3176.6 | 11.1 | C-H stretch<br>(CH <sub>3</sub> , asym) | 2993.6 w     |
| 3189.6 | 11.5 | C-H stretch<br>(CH <sub>3</sub> , asym) | 3190.1 | 9.2  | C-H stretch<br>(CH <sub>3</sub> , asym) | 3038.2 w     |
| 3193.8 | 9.9  | C-H stretch<br>(CH <sub>3</sub> , asym) | 3195.1 | 9.6  | C-H stretch<br>(CH <sub>3</sub> , asym) | 3045.2 w     |
| 3209.1 | 0.1  | C-H in-plane<br>stretch,<br>asym)       | 3209.7 | 0.2  | C-H in-plane<br>stretch, asym)          | not observed |
| 3218.8 | 21.5 | C-H in-plane<br>stretch,<br>asym)       | 3218.5 | 18.4 | C-H in-plane<br>stretch, asym)          | 3057.7 w     |
| 3235.7 | 20.0 | C-H in-plane<br>stretch, sym)           | 3236.7 | 17.3 | C-H in-plane<br>stretch, sym)           | 3084.7 w     |

a: rel. experimental intensities (vw = very weak, w = weak, m = middle, s = strong, vs = very strong)

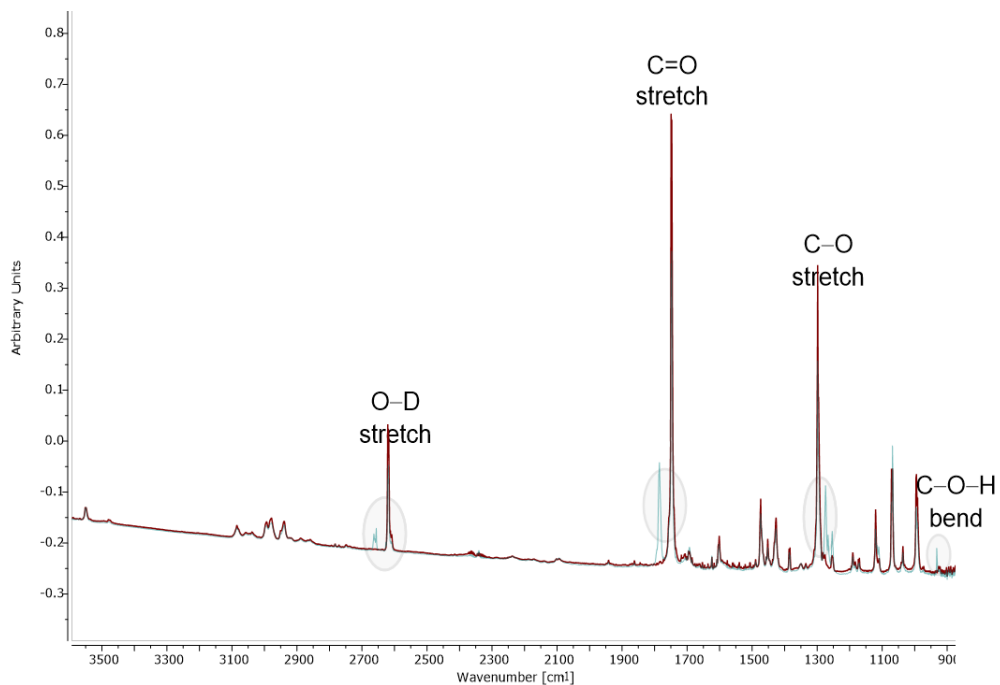

Figure S4.1: Matrix IR spectrum of acid Z-6a in Ar before (red) and after irradiation at 254 nm (green).

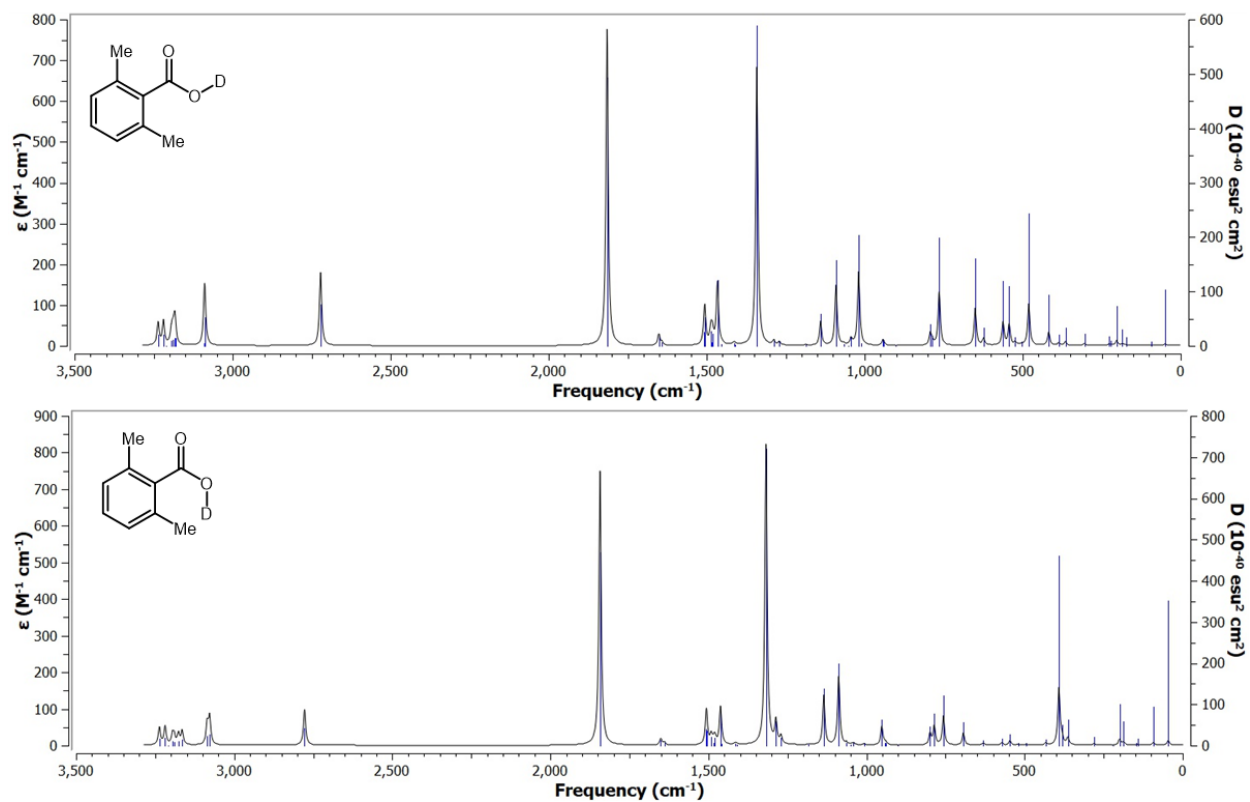

Figure S4.2. MP2/cc-pVDZ Harmonic IR-spectra of *E*- and *Z*-isomers of 6a.

**Table S4.2.** Computed and experimental vibrational frequencies in Ar solid at 11 K for *E-6b* and *Z-6b* (wavenumbers [ $\text{cm}^{-1}$ ], intensities [ $\text{km mol}^{-1}$ ]).

| MP2/cc-pVDZ<br>( <i>Z-6b</i> ) / $\text{cm}^{-1}$ | Intensity /<br>$\text{km mol}^{-1}$ | Approximate<br>Assignment                     | MP2/cc-pVDZ<br>( <i>E-6b</i> ) / $\text{cm}^{-1}$ | Intensity /<br>$\text{km mol}^{-1}$ | Approximate<br>Assignment                     | Ar matrix / $\text{cm}^{-1}$                                                              |
|---------------------------------------------------|-------------------------------------|-----------------------------------------------|---------------------------------------------------|-------------------------------------|-----------------------------------------------|-------------------------------------------------------------------------------------------|
| 869.2                                             | 138.4                               | H-C-C-C torsion                               | 866.5                                             | 125.5                               | H-C-C-C torsion                               | 862.9 s, 870.7 m                                                                          |
| 877.9                                             | 0.3                                 | H-C-C-C torsion                               | 878.6                                             | 4.8                                 | H-C-C-C torsion                               | not observed                                                                              |
| 979.4                                             | 30.3                                | ring-CH <sub>3</sub> wag +<br>H-C-C bend      | 978.5                                             | 9.9                                 | ring-CH <sub>3</sub> wag +<br>H-C-C bend      | 979.5w                                                                                    |
| 993.8                                             | 41.4                                | ring-CH <sub>3</sub> wag +<br>H-C-C bend      | 988.7                                             | 27.4                                | ring-CH <sub>3</sub> wag +<br>H-C-C bend      | 993.6 m                                                                                   |
| 1019.2                                            | 205.4                               | C-O-H bend                                    | 949.5                                             | 73.8                                | C-O-H bend                                    | 977.1 m (Z), 932.5<br>(E)                                                                 |
| 1042.5                                            | 14.4                                | ring-CH <sub>3</sub> wag                      | 1041.2                                            | 4.8                                 | ring-CH <sub>3</sub> wag                      | not observed                                                                              |
| 1050.3                                            | 64.1                                | ring-CH <sub>3</sub> wag                      | 1048.1                                            | 88.5                                | ring-CH <sub>3</sub> wag                      | 1031.3 m                                                                                  |
| 1054.2                                            | 38.4                                | ring-CH <sub>3</sub> wag                      | 1052.1                                            | 12.6                                | ring-CH <sub>3</sub> wag                      | 1035.6 w                                                                                  |
| 1066.2                                            | 1.7                                 | ring-CH <sub>3</sub> wag                      | 1063.8                                            | 9.0                                 | ring-CH <sub>3</sub> wag                      | 1039.8 w                                                                                  |
| 1104.9                                            | 130.5                               | in-plane C-C<br>ring stretch                  | 1103.7                                            | 229.1                               | in-plane C-C<br>ring stretch                  | 1078.5 w/m                                                                                |
| 1169.7                                            | 194.2                               | H-C-C in-plane<br>bend                        | 1167.1                                            | 234.7                               | H-C-C in-plane<br>bend                        | 1144.5 s (Z),<br>1137.9 s (E)                                                             |
| 1226.2                                            | 0.4                                 | H-C-C in-plane<br>bend                        | 1224.6                                            | 2.7                                 | H-C-C in-plane<br>bend                        | 1219.7 vw                                                                                 |
| 1334.8                                            | 376.7                               | C-O stretch                                   | 1313.4                                            | 690.4                               | C-O stretch                                   | 1285.9 vs (Z),<br>1267.2 vs (E)                                                           |
| 1365.3                                            | 532.9                               | F-C-C in-plane<br>bend + C-C<br>stretch       | 1363.5                                            | 371.3                               | F-C-C in-plane<br>bend + C-C<br>stretch       | 1312.9 vs                                                                                 |
| 1408.8                                            | 5.7                                 | C-H wag (CH <sub>3</sub> )                    | 1409.0                                            | 0.4                                 | C-H wag (CH <sub>3</sub> )                    | not observed                                                                              |
| 1415.4                                            | 2.4                                 | C-H wag (CH <sub>3</sub> )                    | 1416.9                                            | 3.5                                 | C-H wag (CH <sub>3</sub> )                    | 1341.1 w                                                                                  |
| 1452.6                                            | 9.8                                 | C-H twist (CH <sub>3</sub> )                  | 1457.5                                            | 13.7                                | C-H twist (CH <sub>3</sub> )                  | 1384.3 w/m                                                                                |
| 1458.8                                            | 1.2                                 | F-C-C bend + C-<br>H sciss (CH <sub>3</sub> ) | 1458.5                                            | 1.9                                 | F-C-C bend + C-<br>H sciss (CH <sub>3</sub> ) | 1398.6 w                                                                                  |
| 1470.0                                            | 113.1                               | C-H sciss (CH <sub>3</sub> )                  | 1466.6                                            | 57.6                                | C-H sciss (CH <sub>3</sub> )                  | 1432.8 m                                                                                  |
| 1481.3                                            | 22.3                                | C-H sciss (CH <sub>3</sub> )                  | 1479.6                                            | 16.8                                | C-H sciss (CH <sub>3</sub> )                  | 1446.2 w/m                                                                                |
| 1485.5                                            | 17.4                                | C-H sciss (CH <sub>3</sub> )                  | 1491.6                                            | 23.0                                | C-H sciss (CH <sub>3</sub> )                  | 1459.7 m                                                                                  |
| 1501.9                                            | 25.4                                | C-H sciss (CH <sub>3</sub> )                  | 1503.5                                            | 20.1                                | C-H sciss (CH <sub>3</sub> )                  | 1472.1 w                                                                                  |
| 1522.4                                            | 79.1                                | C-H sciss (CH <sub>3</sub> )<br>+ H-C-C bend  | 1521.5                                            | 111.8                               | C-H sciss (CH <sub>3</sub> )<br>+ H-C-C bend  | 1483.1 m/s                                                                                |
| 1656.9                                            | 37.2                                | C=C stretch                                   | 1653.8                                            | 39.4                                | C=C stretch                                   | 1596.7 m                                                                                  |
| 1671.0                                            | 267.3                               | C=C stretch                                   | 1669.7                                            | 234.7                               | C=C stretch                                   | 1609.6 s                                                                                  |
| 1814.2                                            | 518.1                               | C=O stretch                                   | 1841.6                                            | 482.1                               | C=O stretch                                   | 1747.5 vs (Z),<br>1786.5 vs (E)                                                           |
| 2722.9                                            | 79.9                                | O-D stretch                                   | 2779.2                                            | 40.7                                | O-D stretch                                   | 2608.2 s (Z, site 1),<br>2619.9 (Z, site 2),<br>2655.2 (E, site 1),<br>2665.3 (E, site 2) |
| 3092.3                                            | 46.7                                | C-H stretch<br>(CH <sub>3</sub> , sym)        | 3079.7                                            | 24.0                                | C-H stretch<br>(CH <sub>3</sub> , sym)        | 2937.2 w                                                                                  |
| 3092.6                                            | 3.5                                 | C-H stretch<br>(CH <sub>3</sub> , sym)        | 3088.9                                            | 19.2                                | C-H stretch<br>(CH <sub>3</sub> , sym)        | 2947.6 w                                                                                  |



|        |      |                                         |        |      |                                         |              |
|--------|------|-----------------------------------------|--------|------|-----------------------------------------|--------------|
| 3187.2 | 12.5 | C-H stretch<br>(CH <sub>3</sub> , asym) | 3166.9 | 12.9 | C-H stretch<br>(CH <sub>3</sub> , asym) | 2983.4 w     |
| 3190.1 | 13.5 | C-H stretch<br>(CH <sub>3</sub> , asym) | 3180.9 | 9.8  | C-H stretch<br>(CH <sub>3</sub> , asym) | 2992.4 w     |
| 3192.7 | 11.1 | C-H stretch<br>(CH <sub>3</sub> , asym) | 3194.8 | 8.2  | C-H stretch<br>(CH <sub>3</sub> , asym) | 3061.9 vw    |
| 3196.4 | 10.3 | C-H stretch<br>(CH <sub>3</sub> , asym) | 3198.6 | 9.8  | C-H stretch<br>(CH <sub>3</sub> , asym) | 3100.2 vw    |
| 3241.6 | 3.2  | C-H in-plane<br>stretch, asym)          | 3240.0 | 2.2  | C-H in-plane<br>stretch, asym)          | 3202.3 vw    |
| 3242.9 | 2.2  | C-H in-plane<br>stretch, sym)           | 3242.0 | 1.7  | C-H in-plane<br>stretch, sym)           | not observed |

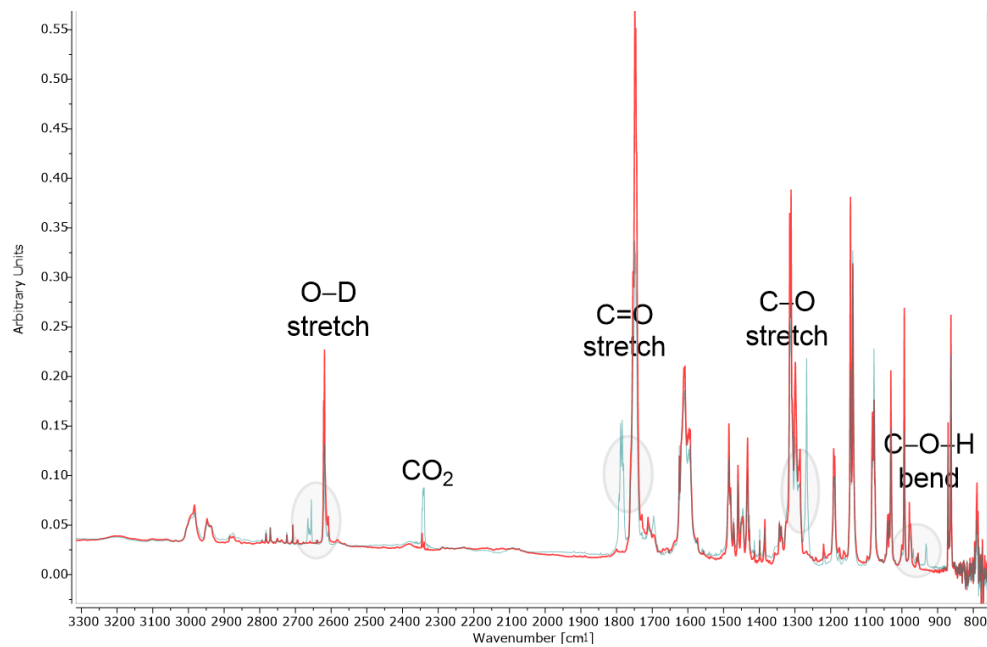

**Figure S4.3:** Matrix IR spectrum of acid Z-6b in Ar before (red) and after irradiation at 254 nm (green).

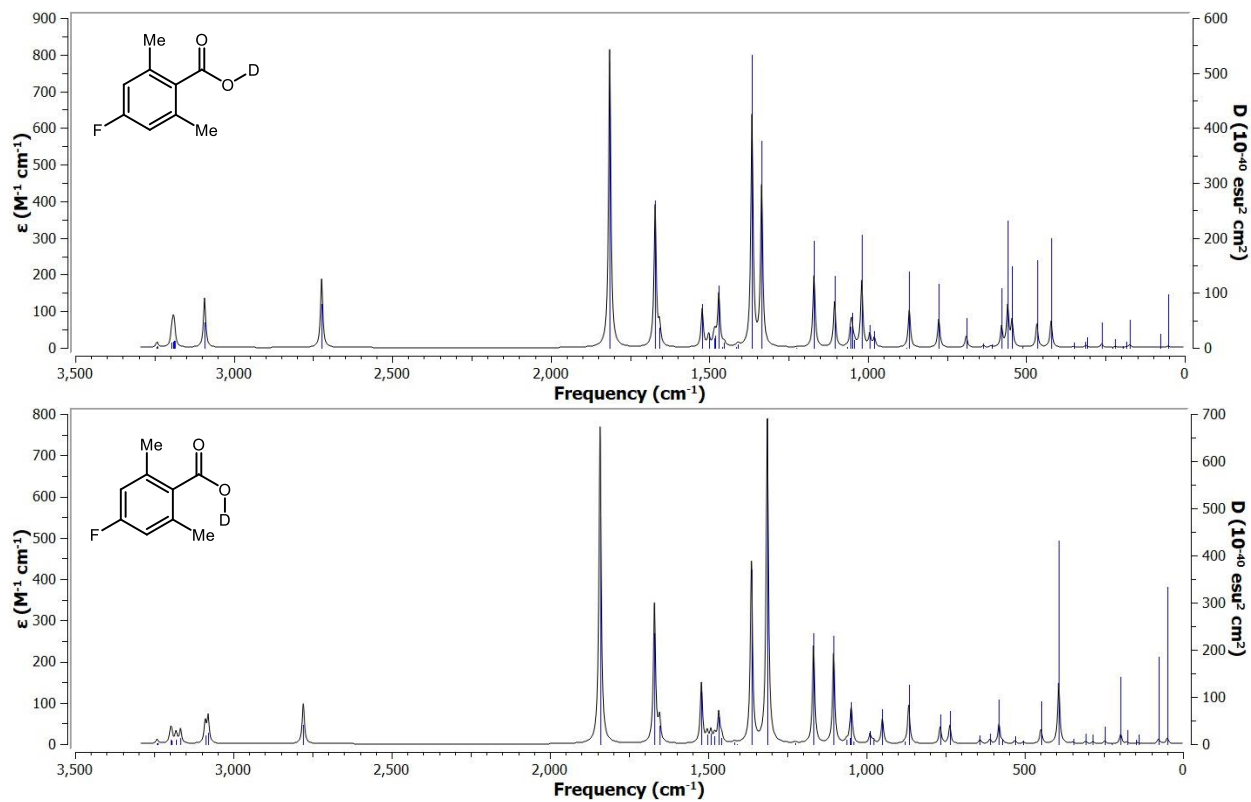

**Figure S4.4.** MP2/cc-pVDZ Harmonic IR-spectra of E- and Z-isomers of 6b.

**Table S4.3.** Computed and experimental vibrational frequencies in Ar solid at 11 K for *E-6c* and *Z-6c* (wavenumbers [ $\text{cm}^{-1}$ ], intensities [ $\text{km mol}^{-1}$ ]).

| MP2/cc-pVDZ<br>( <i>Z-6c</i> ) / $\text{cm}^{-1}$ | Intensity /<br>$\text{km mol}^{-1}$ | Approximate<br>Assignment                    | MP2/cc-pVDZ<br>( <i>E-6c</i> ) / $\text{cm}^{-1}$ | Intensity /<br>$\text{km mol}^{-1}$ | Approximate<br>Assignment                    | Ar matrix / $\text{cm}^{-1}$ |
|---------------------------------------------------|-------------------------------------|----------------------------------------------|---------------------------------------------------|-------------------------------------|----------------------------------------------|------------------------------|
| 853.6                                             | 49.9                                | H-C-C-C torsion                              | 851.3                                             | 48.8                                | H-C-C-C torsion                              | out of range                 |
| 892.0                                             | 0.1                                 | H-C-C-C torsion                              | 892.4                                             | 0.2                                 | H-C-C-C torsion                              | out of range                 |
| 957.3                                             | 12.2                                | ring-CH <sub>3</sub> wag +<br>C-O-H bend     | 949.0                                             | 63.2                                | C-O-H bend                                   | 998.9 m/s (Z),<br>940.9 (E)  |
| 977.9                                             | 1.5                                 | ring-CH <sub>3</sub> wag +<br>C-C-C bend     | 957.5                                             | 11.2                                | ring-CH <sub>3</sub> wag +<br>C-O-H bend     | not observed                 |
| 1018.5                                            | 222.5                               | C-O-H bend                                   | 973.4                                             | 1.3                                 | ring-CH <sub>3</sub> wag +<br>C-C-C bend     | not observed                 |
| 1033.7                                            | 16.0                                | ring-CH <sub>3</sub> wag                     | 1032.7                                            | 12.1                                | ring-CH <sub>3</sub> wag                     | 1035.6 w                     |
| 1037.9                                            | 9.6                                 | ring-CH <sub>3</sub> wag                     | 1037.4                                            | 4.1                                 | ring-CH <sub>3</sub> wag                     | 1040.5 w                     |
| 1042.6                                            | 10.8                                | ring-CH <sub>3</sub> wag                     | 1039.9                                            | 14.2                                | ring-CH <sub>3</sub> wag                     | 1045.5 w                     |
| 1051.7                                            | 0.3                                 | ring-CH <sub>3</sub> wag                     | 1050.0                                            | 5.4                                 | ring-CH <sub>3</sub> wag                     | not observed                 |
| 1052.2                                            | 9.7                                 | C-H wag (CH <sub>3</sub> )                   | 1051.7                                            | 8.0                                 | C-H wag (CH <sub>3</sub> )                   | not observed                 |
| 1066.4                                            | 3.0                                 | C-H wag (CH <sub>3</sub> )                   | 1064.3                                            | 7.9                                 | C-H wag (CH <sub>3</sub> )                   | not observed                 |
| 1099.4                                            | 205.2                               | in-plane H-C-C<br>bend + C-C bend            | 1098.2                                            | 303.0                               | in-plane H-C-C<br>bend + C-C<br>bend         | 1079.3 s                     |
| 1201.2                                            | 40.9                                | H-C-C in-plane<br>bend                       | 1196.8                                            | 84.9                                | H-C-C in-plane<br>bend                       | 1160.8 m                     |
| 1261.4                                            | 2.5                                 | H-C-C in-plane<br>bend                       | 1259.9                                            | 6.8                                 | H-C-C in-plane<br>bend                       | 1177.9 m                     |
| 1332.9                                            | 284.5                               | C-O stretch + CH <sub>3</sub><br>wag         | 1314.6                                            | 708.2                               | C-O stretch                                  | 1301.9 vs (Z),<br>1275.6 (E) |
| 1349.0                                            | 348.5                               | C-O stretch + CH <sub>3</sub><br>wag         | 1343.9                                            | 93.0                                | CH <sub>3</sub> wag + C-C<br>stretch         | 1285.4 m                     |
| 1404.9                                            | 1.8                                 | C-H wag (CH <sub>3</sub> )                   | 1405.3                                            | 2.1                                 | C-H wag (CH <sub>3</sub> )                   | 1381.5 vw                    |
| 1408.0                                            | 4.0                                 | C-H wag (CH <sub>3</sub> )                   | 1408.5                                            | 0.8                                 | C-H wag (CH <sub>3</sub> )                   | 1387.3 vw                    |
| 1416.5                                            | 0.4                                 | C-H wag (CH <sub>3</sub> )                   | 1417.9                                            | 0.6                                 | C-H wag (CH <sub>3</sub> )                   | not observed                 |
| 1440.3                                            | 5.4                                 | C-H wag (CH <sub>3</sub> )                   | 1439.4                                            | 2.4                                 | C-H wag (CH <sub>3</sub> )                   | not observed                 |
| 1453.6                                            | 1.7                                 | C-H sciss (CH <sub>3</sub> )                 | 1458.1                                            | 3.5                                 | C-H sciss (CH <sub>3</sub> )                 | not observed                 |
| 1469.0                                            | 134.2                               | C-H sciss (CH <sub>3</sub> )                 | 1466.2                                            | 87.2                                | C-H sciss (CH <sub>3</sub> )                 | 1404.6 m                     |
| 1481.0                                            | 21.5                                | C-H twist (CH <sub>3</sub> )                 | 1479.3                                            | 18.7                                | C-H twist (CH <sub>3</sub> )                 | 1431.4 m                     |
| 1483.5                                            | 21.9                                | C-H sciss (CH <sub>3</sub> )                 | 1482.6                                            | 14.7                                | C-H sciss (CH <sub>3</sub> )                 | 1446.0 w                     |
| 1485.1                                            | 9.5                                 | C-H sciss (CH <sub>3</sub> )                 | 1490.2                                            | 18.1                                | C-H sciss (CH <sub>3</sub> )                 | 1456.9 w                     |
| 1492.0                                            | 12.9                                | C-H sciss (CH <sub>3</sub> )                 | 1494.0                                            | 16.7                                | C-H sciss (CH <sub>3</sub> )                 | 1464.9 w                     |
| 1501.0                                            | 75.4                                | C-H sciss (CH <sub>3</sub> )                 | 1502.1                                            | 63.0                                | C-H sciss (CH <sub>3</sub> )                 | 1488.8 w                     |
| 1521.6                                            | 11.8                                | C-H sciss (CH <sub>3</sub> ) +<br>H-C-C bend | 1520.5                                            | 14.9                                | C-H sciss (CH <sub>3</sub> ) +<br>H-C-C bend | 1576.4 w                     |
| 1633.4                                            | 9.1                                 | C=C stretch                                  | 1631.2                                            | 7.3                                 | C=C stretch                                  | not observed                 |
| 1668.1                                            | 57.7                                | C=C stretch                                  | 1666.8                                            | 46.7                                | C=C stretch                                  | 1597.3 m                     |
| 1814.1                                            | 516.6                               | C=O stretch                                  | 1842.1                                            | 490.1                               | C=O stretch                                  | 1741.5 vs (Z),<br>1780.8 (E) |

|        |      |                                         |        |      |                                         |                                                                                       |
|--------|------|-----------------------------------------|--------|------|-----------------------------------------|---------------------------------------------------------------------------------------|
| 2722.3 | 78.5 | O-D stretch                             | 2778.4 | 39.2 | O-D stretch                             | 2605.5 s (Z site 1),<br>2614.8 (Z site 2),<br>2641.9 (E site 1),<br>2653.2 (E site 2) |
| 3075.4 | 36.1 | C-H stretch (CH <sub>3</sub> ,<br>sym)  | 3075.9 | 34.0 | C-H stretch<br>(CH <sub>3</sub> , sym)  | 2936.7 w/m                                                                            |
| 3088.1 | 55.9 | C-H stretch (CH <sub>3</sub> ,<br>sym)  | 3077.3 | 30.3 | C-H stretch<br>(CH <sub>3</sub> , sym)  | 2965.3 w/m                                                                            |
| 3088.5 | 4.0  | C-H stretch (CH <sub>3</sub> ,<br>sym)  | 3085.2 | 23.5 | C-H stretch<br>(CH <sub>3</sub> , sym)  | 2990.4 w/m                                                                            |
| 3163.6 | 15.5 | C-H stretch (CH <sub>3</sub> ,<br>asym) | 3162.1 | 14.4 | C-H stretch<br>(CH <sub>3</sub> , asym) | 3015.7 vw                                                                             |
| 3181.1 | 13.8 | C-H stretch (CH <sub>3</sub> ,<br>asym) | 3165.8 | 14.6 | C-H stretch<br>(CH <sub>3</sub> , asym) | 3029.5 vw                                                                             |
| 3183.6 | 12.5 | C-H stretch (CH <sub>3</sub> ,<br>asym) | 3176.1 | 11.5 | C-H stretch<br>(CH <sub>3</sub> , asym) | 3042.2 vw                                                                             |
| 3184.0 | 12.9 | C-H stretch (CH <sub>3</sub> ,<br>asym) | 3184.8 | 11.0 | C-H stretch<br>(CH <sub>3</sub> , asym) | 3082.7 vw                                                                             |
| 3188.2 | 9.4  | C-H stretch (CH <sub>3</sub> ,<br>asym) | 3189.7 | 6.4  | C-H stretch<br>(CH <sub>3</sub> , asym) | 3105.5 vw                                                                             |
| 3192.4 | 6.2  | C-H stretch                             | 3194.0 | 4.2  | C-H stretch                             | not observed                                                                          |
| 3199.8 | 26.8 | C-H stretch                             | 3199.6 | 26.3 | C-H stretch                             | 3157.9 w/m                                                                            |
| 3201.3 | 17.3 | C-H stretch                             | 3200.5 | 13.7 | C-H stretch                             | 3194.4 w                                                                              |

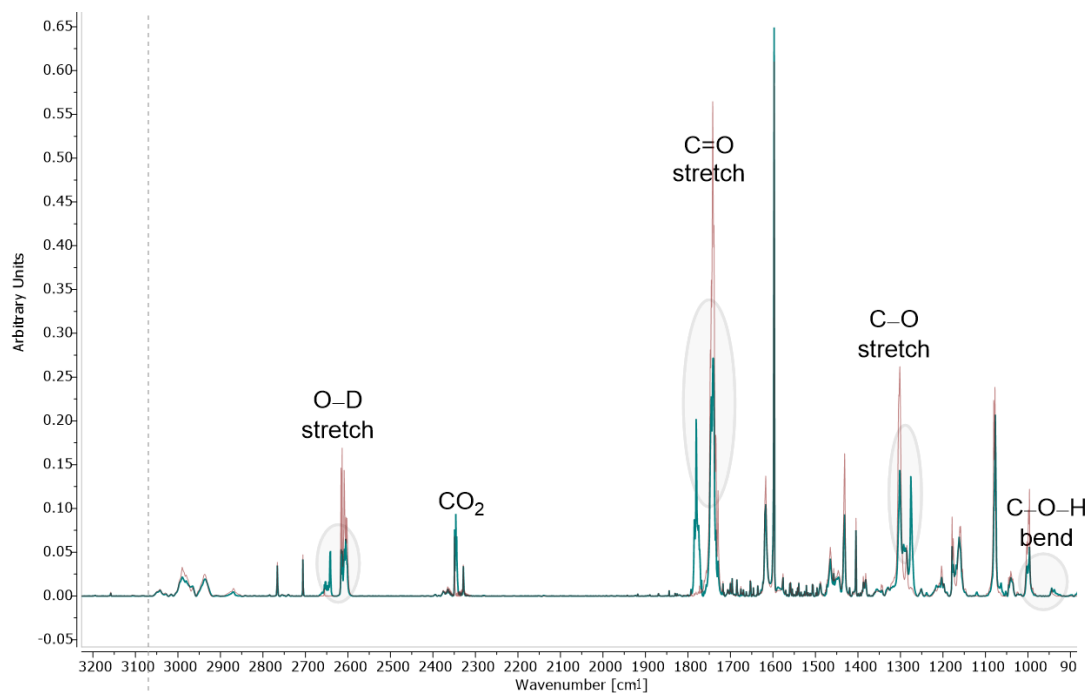

**Figure S4.5:** Matrix IR spectrum of acid Z-6c in Ar before (red) and after irradiation at 254 nm (green).

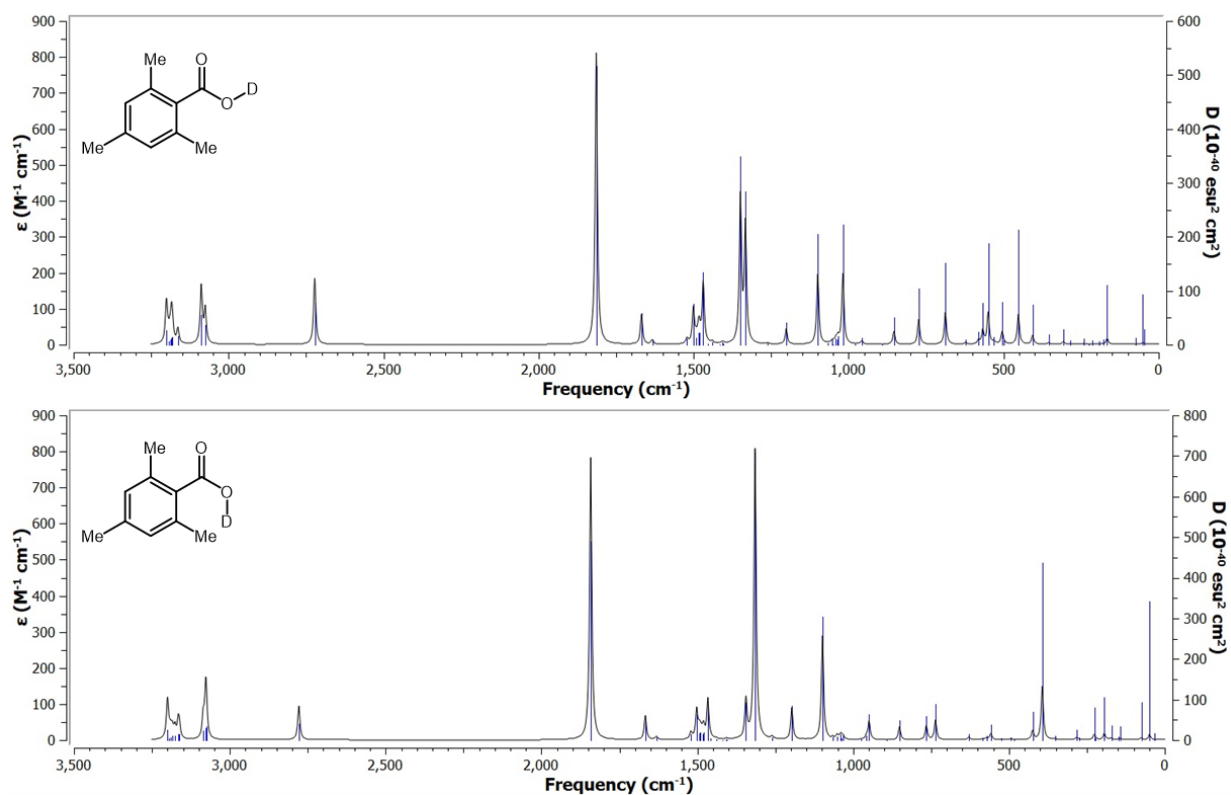

**Figure S4.6:** MP2/cc-pVDZ Harmonic IR-spectra of *E*- and *Z*-isomers of 6c.

**Table S4.4.** Computed and experimental vibrational frequencies in Ar solid at 11 K for *E-6e* and *Z-6e* (wavenumbers [ $\text{cm}^{-1}$ ], intensities [ $\text{km mol}^{-1}$ ]).

| MP2/cc-pVDZ<br>( <i>Z-6e</i> ) / $\text{cm}^{-1}$ | Intensity /<br>$\text{km mol}^{-1}$ | Approximate<br>Assignment                    | MP2/cc-pVDZ<br>( <i>E-6e</i> ) / $\text{cm}^{-1}$ | Intensity /<br>$\text{km mol}^{-1}$ | Approximate<br>Assignment                    | Ar matrix / $\text{cm}^{-1}$                                                              |
|---------------------------------------------------|-------------------------------------|----------------------------------------------|---------------------------------------------------|-------------------------------------|----------------------------------------------|-------------------------------------------------------------------------------------------|
| 853.7                                             | 78.6                                | H-C-C-C<br>torsion                           | 851.2                                             | 75.0                                | H-C-C-C<br>torsion                           | 861.5 s                                                                                   |
| 876.8                                             | 0.5                                 | H-C-C-C<br>torsion                           | 877.4                                             | 0.5                                 | H-C-C-C<br>torsion                           | not observed                                                                              |
| 897.1                                             | 216.2                               | ring-CH <sub>3</sub> wag +<br>Cl-C-C bend    | 897.0                                             | 185.7                               | ring-CH <sub>3</sub> wag +<br>Cl-C-C bend    | 882.5 s                                                                                   |
| 974.7                                             | 17.7                                | ring-CH <sub>3</sub> wag +<br>H-C-C bend     | 973.8                                             | 4.5                                 | ring-CH <sub>3</sub> wag +<br>H-C-C bend     | 870.2 vw                                                                                  |
| 1019.0                                            | 199.8                               | C-O-H bend                                   | 949.2                                             | 77.7                                | C-O-H bend                                   | 993.3 w/m                                                                                 |
| 1024.1                                            | 28.9                                | ring-CH <sub>3</sub> wag                     | 1020.0                                            | 41.2                                | ring-CH <sub>3</sub> wag                     | 1008.9 w                                                                                  |
| 1041.3                                            | 15.7                                | ring-CH <sub>3</sub> wag                     | 1040.2                                            | 5.5                                 | ring-CH <sub>3</sub> wag                     | 1034.2 vw                                                                                 |
| 1051.8                                            | 0.3                                 | ring-CH <sub>3</sub> wag                     | 1050.7                                            | 1.4                                 | ring-CH <sub>3</sub> wag                     | 1036.8 vw                                                                                 |
| 1066.8                                            | 3.7                                 | ring-CH <sub>3</sub> wag                     | 1064.8                                            | 7.7                                 | ring-CH <sub>3</sub> wag                     | 1040.9 vw                                                                                 |
| 1098.0                                            | 166.3                               | ring C-C bend                                | 1096.0                                            | 234.5                               | ring C-C bend                                | 1073.2 s                                                                                  |
| 1154.0                                            | 142.4                               | H-C-C in-plane<br>bend                       | 1148.9                                            | 206.3                               | H-C-C in-plane<br>bend                       | 1122.2 s                                                                                  |
| 1245.2                                            | 1.1                                 | H-C-C in-plane<br>bend                       | 1243.6                                            | 4.7                                 | H-C-C in-plane<br>bend                       | 1195.1 w                                                                                  |
| 1301.2                                            | 32.4                                | Cl-C-C in-plane<br>bend + C-C<br>stretch     | 1299.8                                            | 69.2                                | Cl-C-C in-plane<br>bend + C-C<br>stretch     | 1185.3 m/s                                                                                |
| 1340.6                                            | 660.8                               | C-O stretch                                  | 1319.1                                            | 800.1                               | C-O stretch                                  | 1296.4 s (Z) 1271.0<br>(E)                                                                |
| 1408.2                                            | 3.8                                 | C-H wag (CH <sub>3</sub> )                   | 1408.2                                            | 1.2                                 | C-H wag (CH <sub>3</sub> )                   | not observed                                                                              |
| 1413.2                                            | 0.8                                 | C-H wag (CH <sub>3</sub> )                   | 1414.6                                            | 0.6                                 | C-H wag (CH <sub>3</sub> )                   | not observed                                                                              |
| 1442.0                                            | 12.0                                | C-H twist (CH <sub>3</sub> )                 | 1442.0                                            | 12.2                                | C-H twist (CH <sub>3</sub> )                 | 1335.7 w                                                                                  |
| 1457.2                                            | 10.4                                | C-H sciss (CH <sub>3</sub> )                 | 1459.4                                            | 11.1                                | C-H sciss (CH <sub>3</sub> )                 | 1361.6 w                                                                                  |
| 1466.8                                            | 144.6                               | C-H sciss (CH <sub>3</sub> )                 | 1462.9                                            | 77.8                                | C-H sciss (CH <sub>3</sub> )                 | 1384.2 m                                                                                  |
| 1481.1                                            | 22.1                                | C-H sciss (CH <sub>3</sub> )                 | 1479.1                                            | 18.2                                | C-H sciss (CH <sub>3</sub> )                 | 1398.5 w                                                                                  |
| 1485.1                                            | 17.4                                | C-H sciss (CH <sub>3</sub> )                 | 1490.8                                            | 23.2                                | C-H sciss (CH <sub>3</sub> )                 | 1427.8 w                                                                                  |
| 1499.0                                            | 38.6                                | C-H sciss (CH <sub>3</sub> )                 | 1500.6                                            | 33.5                                | C-H sciss (CH <sub>3</sub> )                 | 1456.9 w                                                                                  |
| 1506.0                                            | 34.0                                | C-H sciss (CH <sub>3</sub> )<br>+ H-C-C bend | 1505.7                                            | 53.7                                | C-H sciss (CH <sub>3</sub> )<br>+ H-C-C bend | 1586.9 w/m                                                                                |
| 1631.1                                            | 21.8                                | C=C stretch                                  | 1628.9                                            | 23.8                                | C=C stretch                                  | 1589.5 w                                                                                  |
| 1642.8                                            | 170.4                               | C=C stretch                                  | 1642.4                                            | 141.4                               | C=C stretch                                  | 1593.3 m                                                                                  |
| 1814.6                                            | 516.6                               | C=O stretch                                  | 1841.7                                            | 485.6                               | C=O stretch                                  | 1751.4 s (Z), 1788.7<br>(E)                                                               |
| 2722.1                                            | 84.3                                | O-D stretch                                  | 2778.2                                            | 41.0                                | O-D stretch                                  | 2619.3 s (Z, site 1),<br>2639.2 (Z, site 2),<br>2655.9 (E, site 1),<br>2666.5 (Z, site 2) |
| 3091.7                                            | 45.1                                | C-H stretch<br>(CH <sub>3</sub> , sym)       | 3080.0                                            | 23.9                                | C-H stretch<br>(CH <sub>3</sub> , sym)       | 2942.9 w                                                                                  |
| 3092.1                                            | 4.2                                 | C-H stretch<br>(CH <sub>3</sub> , sym)       | 3088.2                                            | 19.0                                | C-H stretch<br>(CH <sub>3</sub> , sym)       | 2989.7 w                                                                                  |

|        |      |                                         |        |      |                                         |              |
|--------|------|-----------------------------------------|--------|------|-----------------------------------------|--------------|
| 3186.4 | 12.1 | C-H stretch<br>(CH <sub>3</sub> , asym) | 3167.6 | 12.1 | C-H stretch<br>(CH <sub>3</sub> , asym) | 2996.1 w     |
| 3189.1 | 13.0 | C-H stretch<br>(CH <sub>3</sub> , asym) | 3180.3 | 9.3  | C-H stretch<br>(CH <sub>3</sub> , asym) | not observed |
| 3193.4 | 10.4 | C-H stretch<br>(CH <sub>3</sub> , asym) | 3194.0 | 8.0  | C-H stretch<br>(CH <sub>3</sub> , asym) | not observed |
| 3197.1 | 9.5  | C-H stretch<br>(CH <sub>3</sub> , asym) | 3198.8 | 9.1  | C-H stretch<br>(CH <sub>3</sub> , asym) | not observed |
| 3235.9 | 1.9  | C-H in-plane<br>stretch, asym)          | 3234.3 | 1.2  | C-H in-plane<br>stretch, asym)          | not observed |
| 3236.9 | 1.8  | C-H in-plane<br>stretch, sym)           | 3236.3 | 1.4  | C-H in-plane<br>stretch, sym)           | not observed |

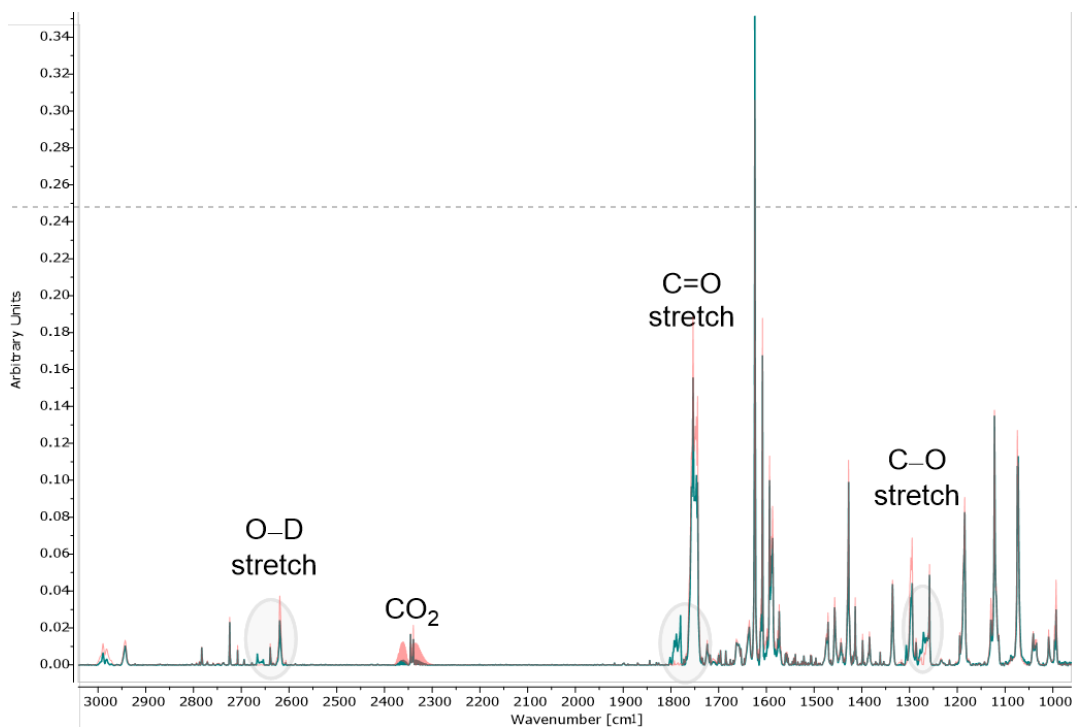

Figure S4.7. Matrix IR spectrum of acid Z-6e in Ar before (red) and after irradiation at 254 nm (green).

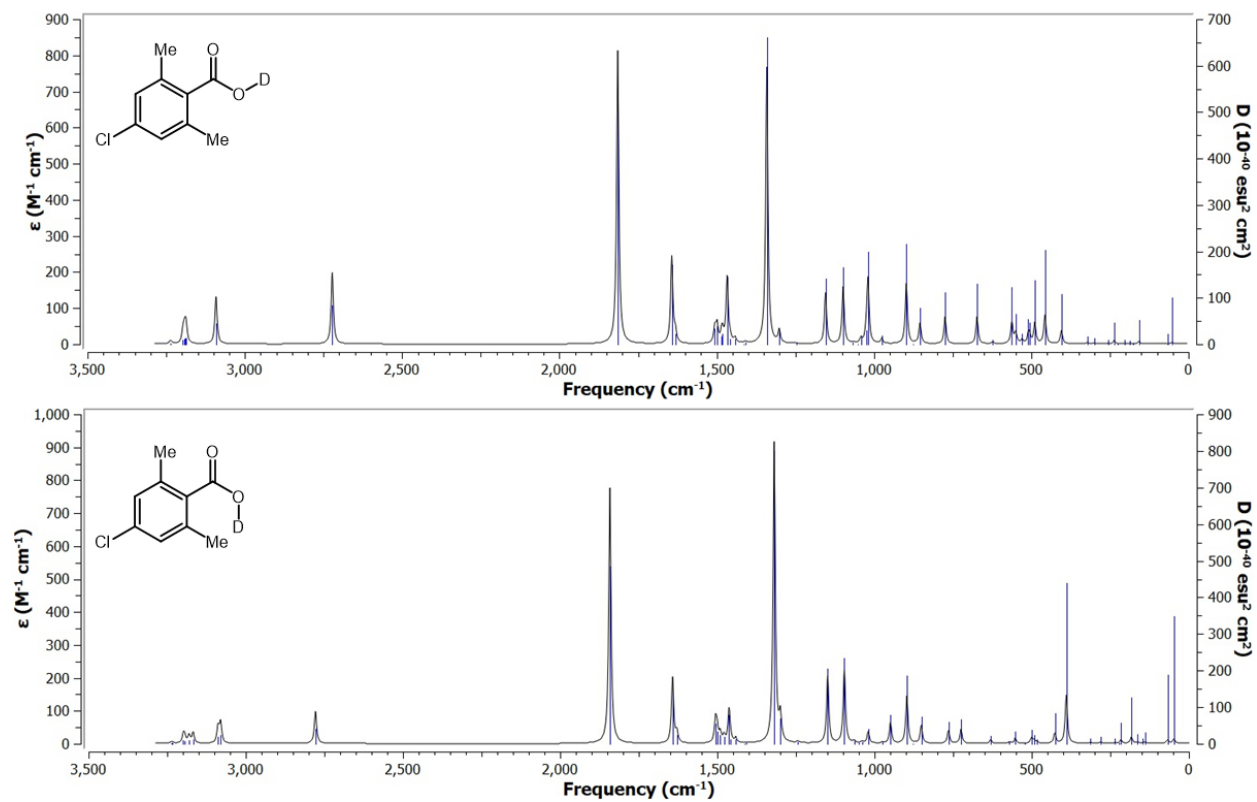

Figure S4.8. MP2/cc-pVDZ Harmonic IR-spectra of E- and Z-isomers of 6e.



**Table S4.5.** Computed and experimental vibrational frequencies in Ar solid at 11 K for *E-7a* and *Z-7a* (wavenumbers [ $\text{cm}^{-1}$ ], intensities [ $\text{km mol}^{-1}$ ]).

| MP2/cc-pVDZ ( <i>Z-7a</i> ) / $\text{cm}^{-1}$ | Intensity / $\text{km mol}^{-1}$ | Approximate Assignment                    | MP2/cc-pVDZ ( <i>E-7a</i> ) / $\text{cm}^{-1}$ | Intensity / $\text{km mol}^{-1}$ | Approximate Assignment                    | Ar matrix / $\text{cm}^{-1}$ |
|------------------------------------------------|----------------------------------|-------------------------------------------|------------------------------------------------|----------------------------------|-------------------------------------------|------------------------------|
| 931.4                                          | 0.2                              | H-C-C-C torsion                           | 934.0                                          | 0.1                              | H-C-C-C torsion                           | not observed                 |
| 968.9                                          | 3.1                              | H-C-C-C torsion                           | 971.6                                          | 8.4                              | H-C-C-C torsion                           | not observed                 |
| 1019.8                                         | 175.2                            | C-O-H bend                                | 959.0                                          | 96.2                             | C-O-H bend                                | 992.8 vw                     |
| 1067.9                                         | 29.4                             | C-C-C bend + H-C-C bend                   | 1065.0                                         | 8.8                              | C-C-C bend + H-C-C bend                   | 1061.8 vw                    |
| 1097.9                                         | 218.0                            | H-C-C in-plane bend                       | 1096.8                                         | 224.5                            | H-C-C in-plane bend                       | 1077.3 m                     |
| 1152.3                                         | 43.9                             | H-C-C in-plane bend                       | 1150.8                                         | 81.0                             | H-C-C in-plane bend                       | 1150.6 w                     |
| 1160.7                                         | 197.9                            | H-C-C in-plane bend                       | 1158.1                                         | 243.2                            | H-C-C in-plane bend                       | 1159.1 m/s                   |
| 1209.8                                         | 33.3                             | H-C-C in-plane bend                       | 1190.9                                         | 592.7                            | H-C-C bend + C-F stretch                  | 1161.8 s                     |
| 1220.1                                         | 445.4                            | C-F stretch                               | 1211.6                                         | 159.4                            | H-C-C in-plane bend                       | 1166.9 s                     |
| 1224.9                                         | 1130.8                           | H-C-C bend + C-F stretch                  | 1230.0                                         | 796.5                            | C-F stretch                               | 1177.2 s                     |
| 1234.3                                         | 872.5                            | H-C-C bend + C-F stretch                  | 1233.7                                         | 773.3                            | C-C-C bend + C-C-H bend                   | 1190.4 s                     |
| 1237.0                                         | 879.4                            | H-C-C bend + C-F stretch                  | 1254.5                                         | 772.4                            | H-C-C bend + C-F stretch                  | 1193.6 s                     |
| 1325.6                                         | 1189.5                           | H-C-C in-plane bend                       | 1326.1                                         | 1046.7                           | C-O stretch                               | 1212.9 vs                    |
| 1351.7                                         | 990.1                            | C-O stretch + H-C-C bend                  | 1327.0                                         | 1464.0                           | C-O stretch + H-C-C bend                  | 1302.2 vs                    |
| 1389.6                                         | 370.0                            | C-(CF <sub>3</sub> ) stretch + H-C-C bend | 1389.6                                         | 415.0                            | C-(CF <sub>3</sub> ) stretch + H-C-C bend | 1309.6 m/s                   |
| 1487.4                                         | 34.3                             | C=C stretch + H-C-C bend                  | 1484.0                                         | 45.2                             | C=C stretch                               | 1347.9 m                     |
| 1506.1                                         | 36.6                             | C=C stretch + H-C-C bend                  | 1500.2                                         | 50.5                             | C=C stretch + H-C-C bend                  | 1478.0 w                     |
| 1512.2                                         | 71.3                             | C=C stretch + H-C-C bend                  | 1506.8                                         | 26.0                             | C=C stretch + H-C-C bend                  | not observed                 |
| 1649.9                                         | 61.9                             | C=C stretch                               | 1645.6                                         | 62.6                             | C=C stretch                               | 1600.9 w                     |
| 1659.6                                         | 2.3                              | C=C stretch                               | 1658.4                                         | 1.9                              | C=C stretch                               | not observed                 |
| 1839.4                                         | 501.5                            | C=O stretch                               | 1853.4                                         | 472.9                            | C=O stretch                               | 1779.0 s (Z), 1800.8 (E)     |
| 2723.8                                         | 93.1                             | O-D stretch                               | 2784.8                                         | 66.6                             | O-D stretch                               | 2617.1 s (Z), 2661.9 (E)     |
| 3239.3                                         | 2.8                              | C-H stretch (CH <sub>3</sub> , asym)      | 3240.6                                         | 2.2                              | C-H stretch (CH <sub>3</sub> , asym)      | not observed                 |
| 3263.6                                         | 0.2                              | C-H stretch (CH <sub>3</sub> , asym)      | 3264.1                                         | 0.3                              | C-H stretch (CH <sub>3</sub> , asym)      | not observed                 |
| 3267.8                                         | 1.0                              | C-H in-plane stretch, sym)                | 3268.2                                         | 0.7                              | C-H in-plane stretch, sym)                | not observed                 |

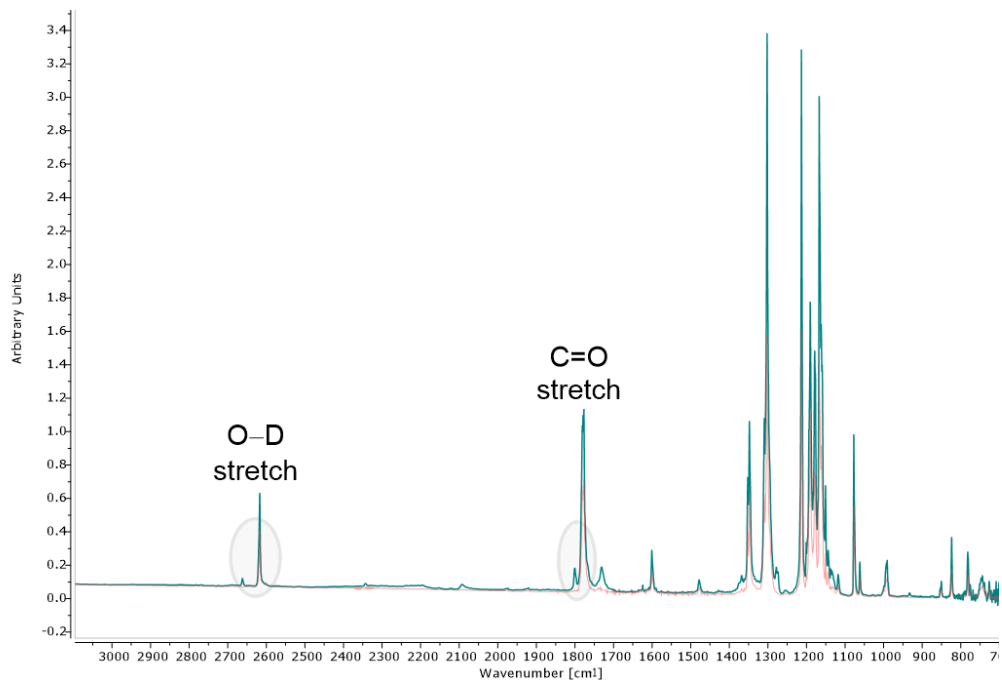

Figure S4.9. Matrix IR spectrum of acid Z-7a in Ar before (red) and after irradiation at 254 nm (green).

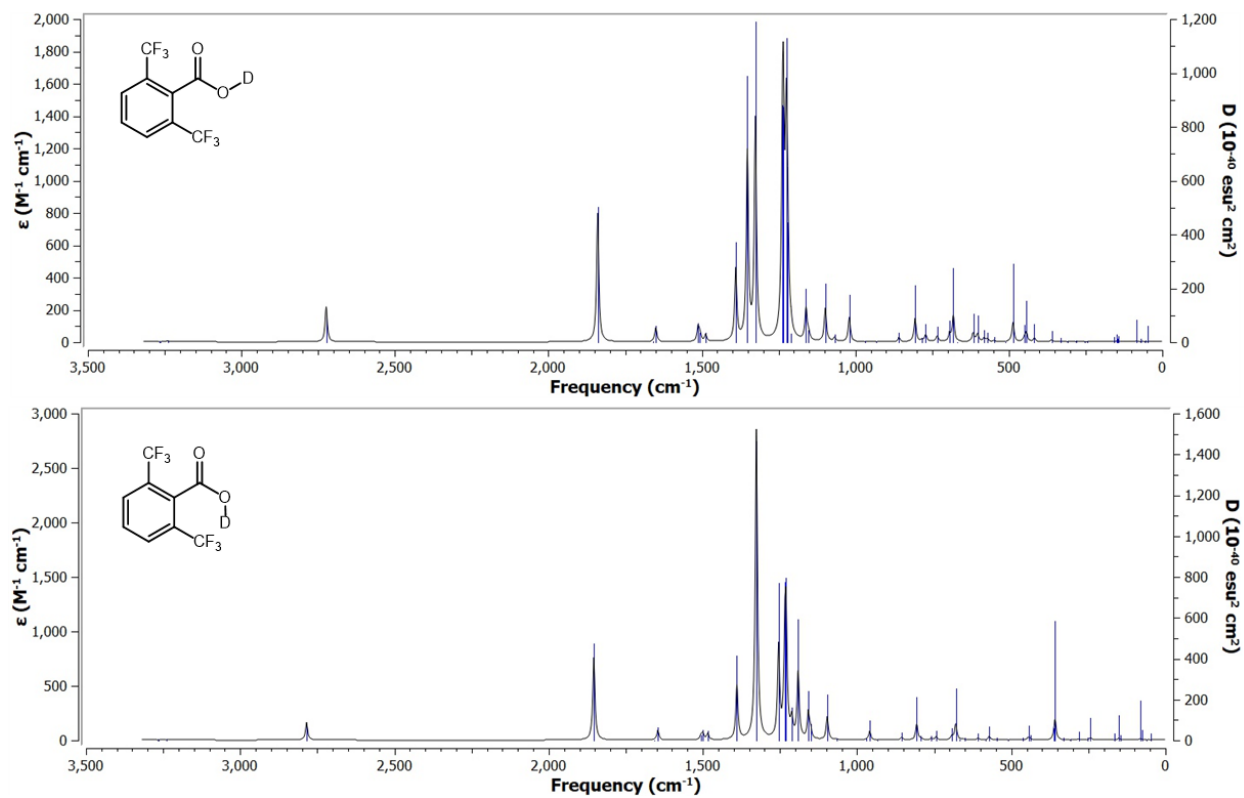

Figure S4.10. MP2/cc-pVDZ Harmonic IR-spectra of *E*- and *Z*-isomers of 7a

## 5. Matrix Isolation Kinetic Measurements

As in our previous matrix isolation study on benzoic acid derivatives (compounds **5a**, **5c**, and **5d**), the characteristic C=O IR stretching bands were quantitatively monitored to determine the  $E \rightarrow Z$  isomerization rate constants.<sup>2</sup> The C=O peak intensities of the  $E$ -isomer ( $[E]$ ) and the  $Z$ -isomer ( $[Z]$ ) were both monitored. The logarithm of the quotient  $\ln([E]/([E]+[Z]))$  was then plotted against  $t$  to obtain the first-order decay constant  $k$ , *i.e.*, as  $\ln([E]/([E]+[Z])) = k \cdot t + \text{const}$ . The half-life  $t_{1/2(\text{exp})}$  equals  $\ln(2)/k$ . Note that very low extinction values  $E$ , which can hardly be told apart from the baseline, lead to values of  $[E]$  which are afflicted with a large error. These data points were therefore excluded from the fitting procedure and are thus not shown in the kinetic plots.

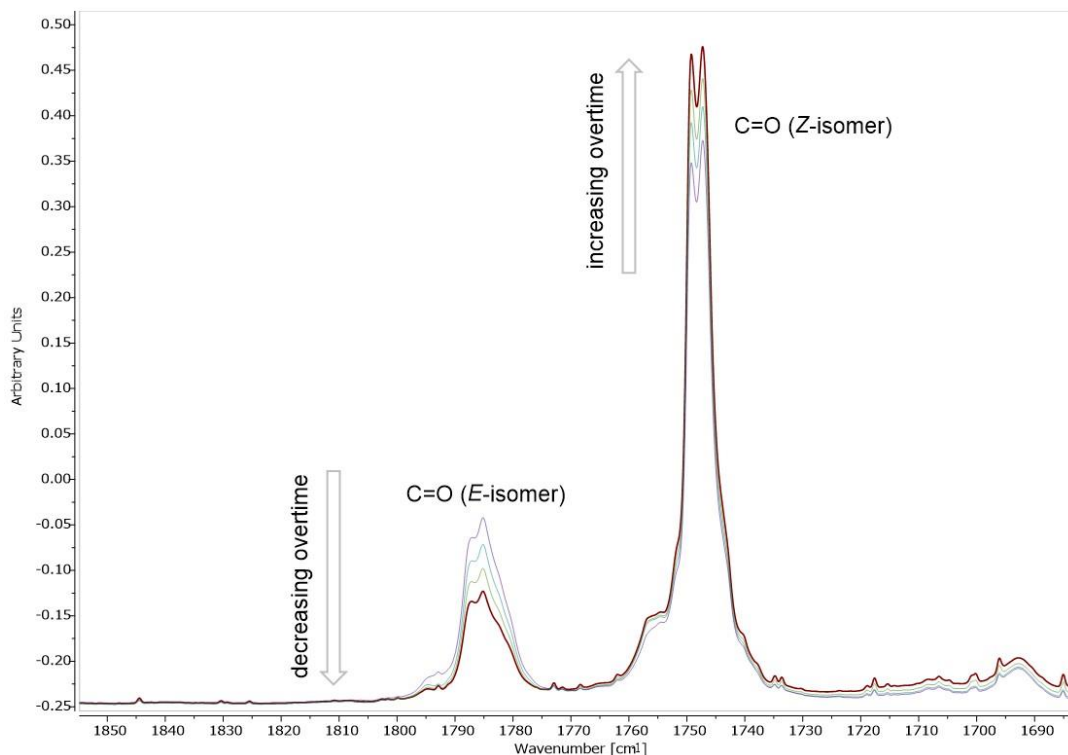

**Figure S5.1.** Decay of the matrix isolated  $E$ -6a (Ar, 11 K) as monitored by the evolution of intensities of the two C=O bands at 1748.2 and 1785.1 cm<sup>-1</sup> over time.

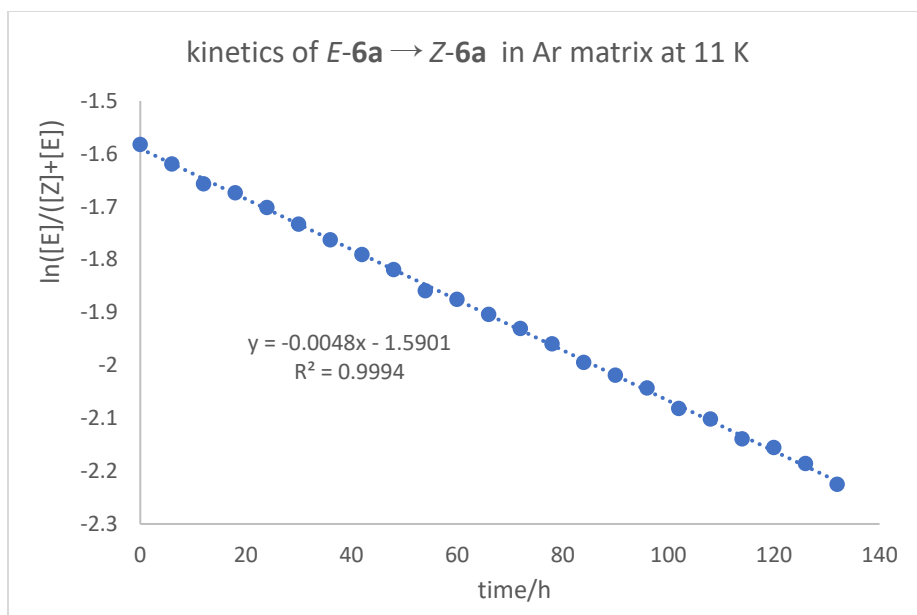

**Figure S5.2.** Kinetic evaluation of *E-6a* ( $1785.1 \text{ cm}^{-1}$ ) → *Z-6a* ( $1748.2 \text{ cm}^{-1}$ ) in Ar, 11 K; half-life  $t_{1/2(\text{exp})}$  (**6a**) =  $(8660 \pm 60)$  min.

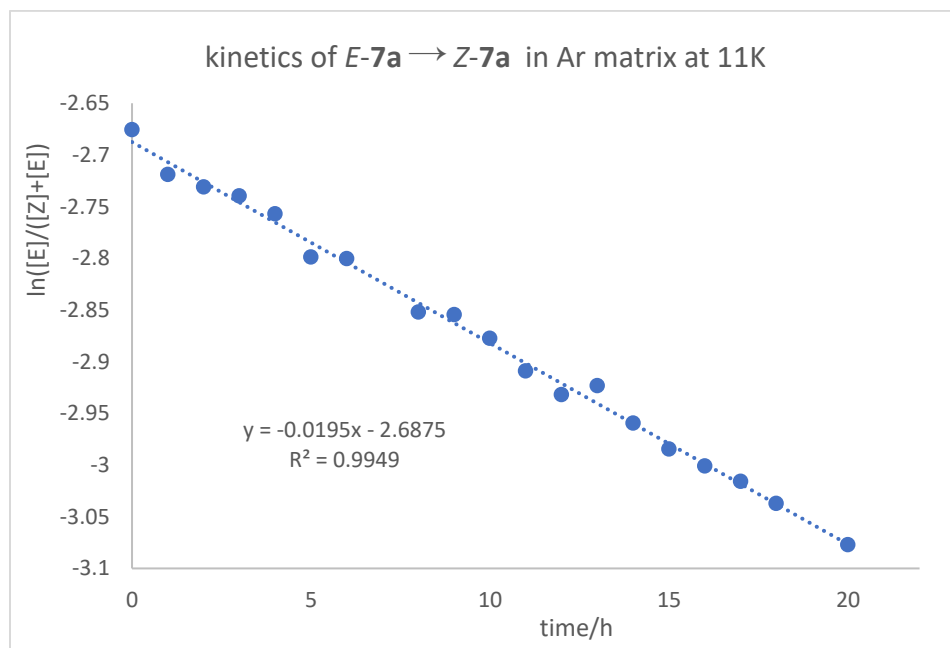

**Figure S5.3.** Kinetic evaluation of *E-7a* ( $1800.8 \text{ cm}^{-1}$ ) → *Z-7a* ( $1779.0 \text{ cm}^{-1}$ ) in Ar, 11 K; half-life  $t_{1/2(\text{exp})}$  (**7a**) =  $(2080 \pm 50)$  min.

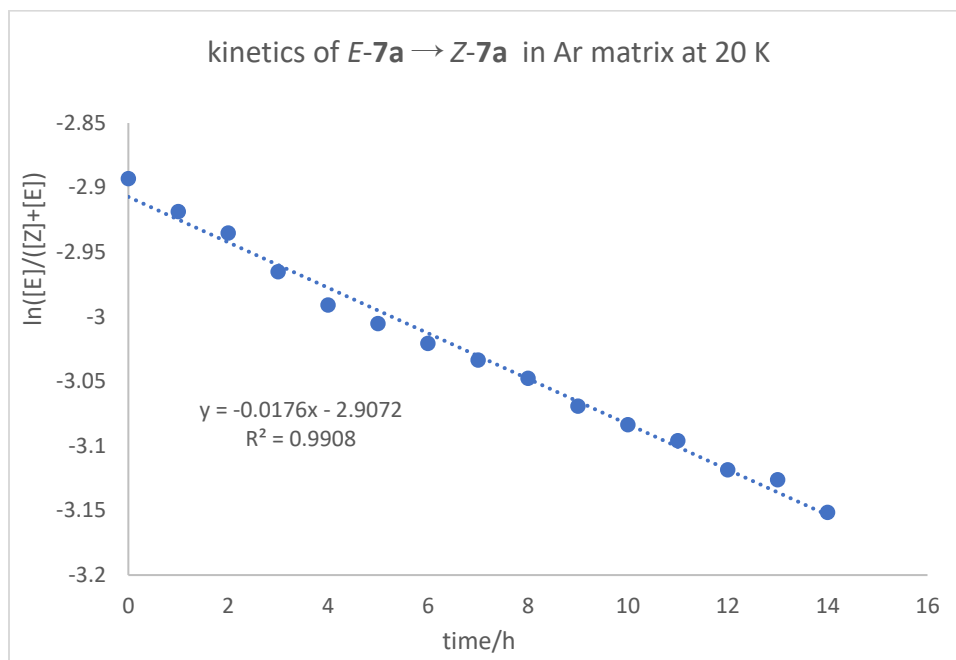

**Figure S5.4** Kinetic evaluation of *E-7a* ( $1800.8\text{ cm}^{-1}$ ) → *Z-7a* ( $1779.0\text{ cm}^{-1}$ ) in Ar, 20 K;  
half-life  $t_{1/2(\text{exp})}$  (**7a**) =  $(2360 \pm 60)$  min.

The kinetic behavior of the **6b**, **6c**, and **6e** isomerizations is more complicated, because the rate constant  $k$  measured in a given matrix at 11 K is not constant, but displayed two rate constants. This is observed frequently in solid-state reactions resulting in dispersive kinetics. Some molecules form in “fast” matrix sites and isomerize much more quickly than others that occupy “slow” sites, where “fast” sites react first and “slow” sites later.<sup>4</sup> We employ the model (**equation 1**) from our previous study of dispersive kinetics in conformational tunneling in carbonic acid monomethyl ester.<sup>5</sup> As before, we define the effective half life as the time required for the fitted relative population function of the *E*-isomer to reach  $[Y]=1/2[Y]_0$ .

$$Y/Y_0 = \frac{2^{-t/\tau_{\text{slow}}} + B \times 2^{-t/\tau_{\text{fast}}}}{1 + B} \quad (1)$$

$Y$ : percentage of *E*-isomer  $[E]/([E]+[Z])$

$Y_0$ : initial percentage of *E*-isomer  $[E]_0/([E]_0+[Z]_0)$

$B$ :  $[E]_{\text{fast-site}}/[E]_{\text{slow-site}}$

$\tau_{\text{slow}}$ : half life of the slow-site

$\tau_{\text{fast}}$ : half life of the fast-site

effective half life: time required to reach  $[Y]=1/2[Y]_0$

kinetics of *E*-(**6b**) → *Z*-(**6b**) in Ar matrix at 11 K

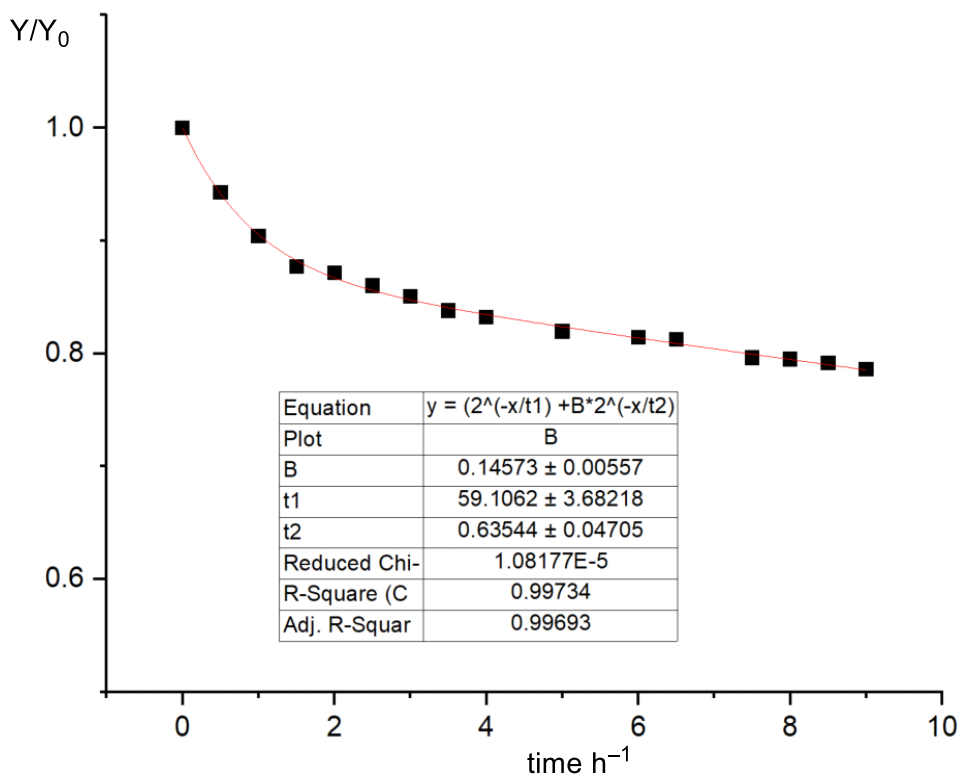

**Figure S5.5** Kinetic evaluation of *E*-(**6b**) (1786.5 cm<sup>-1</sup>) → *Z*-(**6b**) (1747.5 cm<sup>-1</sup>) in Ar, 11 K

$$k_{\text{fast}} = (0.087 \pm 0.009) \text{ h}^{-1}, \% \text{ fast-site} = 12\%$$

$$k_{\text{slow}} = (0.0137 \pm 0.0008) \text{ h}^{-1}, \% \text{ slow-site} = 88\%$$

$$\text{half-life } t_{1/2(\text{exp})}(\mathbf{6b}) = (2800 \pm 100) \text{ min}$$

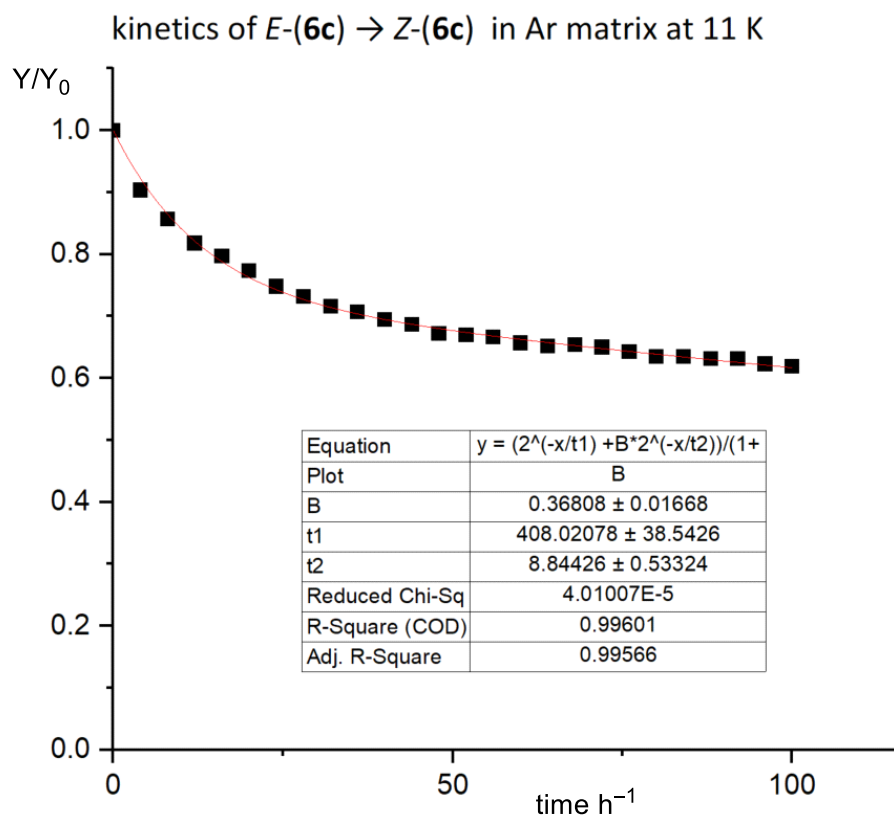

**Figure S5.6.** Kinetic evaluation of *E*-(**6c**) (1780.8 cm<sup>-1</sup>) → *Z*-(**6c**) (1741.5 cm<sup>-1</sup>) in Ar, 11 K

$$k_{\text{fast}} = (0.0081 \pm 0.0005) \text{ h}^{-1}, \% \text{ fast-site} = 30\%$$

$$k_{\text{slow}} = (0.0018 \pm 0.00009) \text{ h}^{-1}, \% \text{ slow-site} = 70\%$$

$$\text{half-life } t_{1/2(\text{exp})}(\mathbf{6c}) = (13300 \pm 700) \text{ min}$$

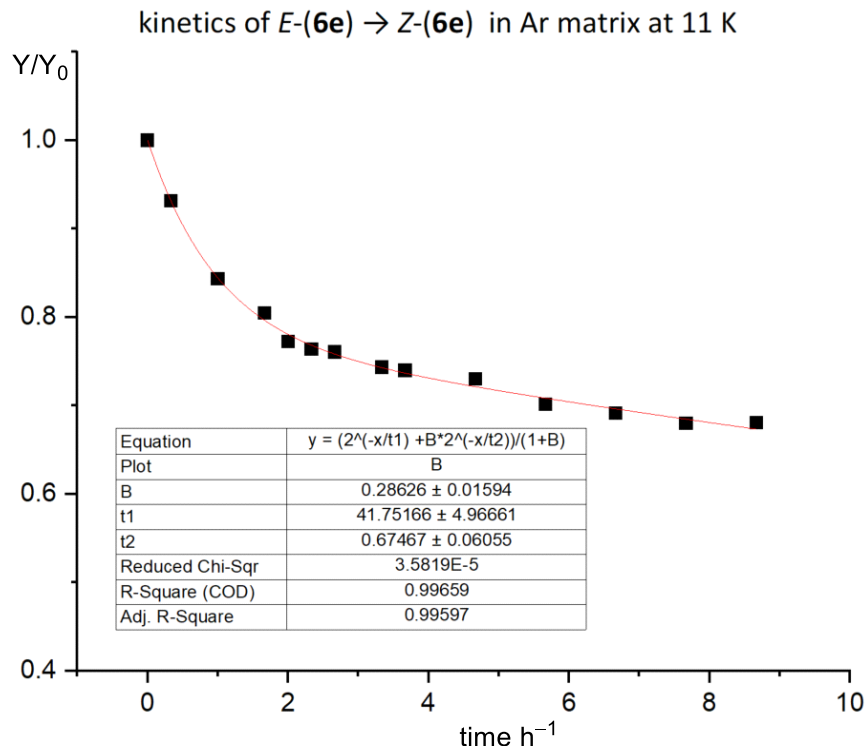

**Figure S5.7.** Kinetic evaluation of  $E\text{-}(\mathbf{6e})$  ( $1788.7 \text{ cm}^{-1}$ )  $\rightarrow$   $Z\text{-}(\mathbf{6e})$  ( $1751.4 \text{ cm}^{-1}$ ) in Ar, 11 K

$$k_{\text{fast}} = (0.11 \pm 0.01) \text{ h}^{-1}, \quad \% \text{ fast-site} = 23\%$$

$$k_{\text{slow}} = (0.022 \pm 0.001) \text{ h}^{-1}, \quad \% \text{ slow-site} = 77\%$$

$$\text{half-life } t_{1/2(\text{exp})}(\mathbf{6e}) = 30.8 \text{ h} = (1600 \pm 200) \text{ min}$$

As mentioned in the main text, to provide a more intuitive sense of the significance of the intrinsic QMT reactivity, we take the *ortho*-H series as the reference and assume that all compounds studied have the same intrinsic QMT reactivity and that the BEP principle alone is able to model their reactivity. Each reaction's free activation energy change was submitted to the linear BEP equation of the *ortho*-H series, obtaining  $t_{1/2}(\text{"R=H"})$  in Table 2 of the main text. Such hypothetical half-lives are about two orders of magnitude different from the experimental half-lives. Here we compare each of the fast site and the slow site individually with  $t_{1/2}(\text{"R=H"})$  (**Table S5.1**). All  $t_{1/2}(\text{"R=H"})$  differ from the actual half-lives of the fast site and the slow site by about 1.5-3.5 orders of magnitude, both still manifesting the importance of intrinsic QMT reactivity.



**Table S5.1.** Experimental half-lives of the fast site ( $t_{1/2(\text{fast})}$ ) and the slow site ( $t_{1/2(\text{slow})}$ ) for the  $E \rightarrow Z$  rotamerization of compounds **6b**, **6c**, and **6e** in Ar matrix at 11 K, and hypothetical half-lives ( $t_{1/2''R=H''}$ ) that assume that the intrinsic reactivity for all compounds (regardless of R) is identical to the R=H series.

| Compound  | R= | X= | $\Delta G$ (kcal/mol) | $t_{1/2(\text{fast})}$ (min) | $t_{1/2(\text{slow})}$ (min) | $t_{1/2''R=H''}$ (min) |
|-----------|----|----|-----------------------|------------------------------|------------------------------|------------------------|
| <b>6b</b> | Me | Me | -4.1                  | 530                          | 24500                        | 517000                 |
| <b>6e</b> | Me | Cl | -4.4                  | 40                           | 2500                         | 132000                 |
| <b>6c</b> | Me | F  | -4.4                  | 40                           | 3500                         | 150000                 |

The rate constant of a QMT reaction not only depends linearly on the barrier width but also has a square root dependence on the barrier height, by our definition. Thus, the *intrinsic* QMT reactivity also has a square root dependence on the *intrinsic* barrier height, besides the linear dependence on the *intrinsic* barrier width. The plot of experimental half-life against thermodynamic driving force is normalized to remove the effect of the barrier height to the QMT rate (**Figure S5.8**). There are still three distinct intrinsic QMT reactivities displayed, reflecting exclusively the role of the intrinsic barrier width.

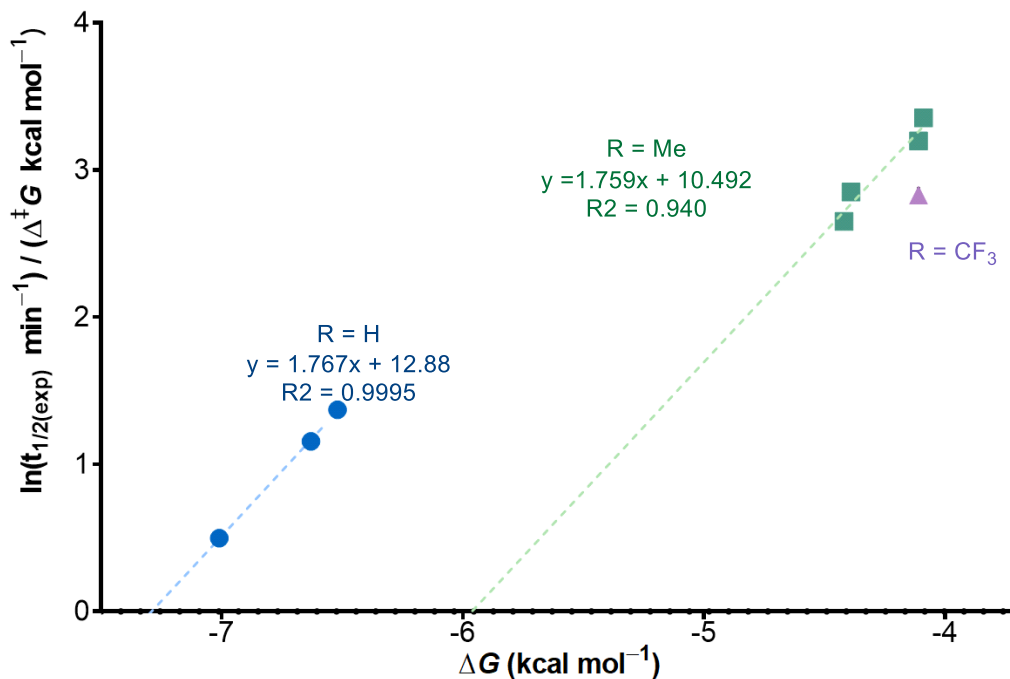

**Figure S5.8.** Barrier-height-normalized plot of experimental QMT  $\ln(t_{1/2})$  in min against the free energy change of  $E \rightarrow Z$  rotamerization in Ar matrix at 11 K.

## References

- (1) Gaussian 09, M. J. Frisch, G. W. Trucks, H. B. Schlegel, G. E. Scuseria, M. A. Robb, J. R. Cheeseman, G. Scalmani, V. Barone, B. Mennucci, G. A. Petersson, H. Nakatsuji, M. Caricato, X. Li, H. P. Hratchian, A. F. Izmaylov, J. Bloino, G. Zheng, J. L. Sonnenberg, M. Hada, M. Ehara, K. Toyota, R. Fukuda, J. Hasegawa, M. Ishida, T. Nakajima, Y. Honda, O. Kitao, H. Nakai, T. Vreven, J. A. Montgomery, Jr., J. E. Peralta, F. Ogliaro, M. Bearpark, J. J. Heyd, E. Brothers, K. N. Kudin, V. N. Staroverov, R. Kobayashi, J. Normand, K. Raghavachari, A. Rendell, J. C. Burant, S. S. Iyengar, J. Tomasi, M. Cossi, N. Rega, J. M. Millam, M. Klene, J. E. Knox, J. B. Cross, V. Bakken, C. Adamo, J. Jaramillo, R. Gomperts, R. E. Stratmann, O. Yazyev, A. J. Austin, R. Cammi, C. Pomelli, J. W. Ochterski, R. L. Martin, K. Morokuma, V. G. Zakrzewski, G. A. Voth, P. Salvador, J. J. Dannenberg, S. Dapprich, A. D. Daniels, O. Farkas, J. B. Foresman, J. V. Ortiz, J. Cioslowski, D. J. Fox, Gaussian, Inc., Wallingford CT, 2009
- (2) Amiri, S., Reisenauer, H. P. & Schreiner, P. R. Electronic effects on atom tunneling: Conformational isomerization of monomeric para -substituted benzoic acid derivatives. *J. Am. Chem. Soc.* **132**, 15902–15904 (2010).
- (3) J. Zheng, J. L. Bao, R. Meana-Pañeda, S. Zhang, B. J. Lynch, J. C. Corchado, Y.-Y. Chuang, P. L. Fast, W.-P. Hu, Y.-P. Liu, G. C. Lynch, K. A. Nguyen, C. F. Jackels, A. Fernandez Ramos, B. A. Ellingson, V. S. Melissas, J. Villà, I. Rossi, E. L. Coitiño, J. Pu, T. V. Albu, A. Ratkiewicz, R. Steckler, B. C. Garrett, A. D. Isaacson, D. G. Truhlar, Polyrate Version 2017-C, 2017, University of Minnesota, Minneapolis.
- (4) Ertelt, M., Hrovat, D.A., Borden, W.T. & Sander, W. Heavy-Atom Tunneling in the Ring Opening of a Strained Cyclopropene at Very Low Temperatures. *Chem. Eur. J.* **20**, 4713-4720 (2014).
- (5) Linden, M. M.; Wagner, J. P.; Bernhardt, B.; Bartlett, M. A.; Allen, W. D.; Schreiner, P. R. Intricate Conformational Tunneling in Carbonic Acid Monomethyl Ester. **9** *J. Phys. Chem. Lett.* 1663– 1667 (2018)
